1 **TWIST1 and chromatin regulatory proteins interact to guide neural crest cell**  
2 **differentiation**

3 Xiaochen Fan<sup>1,2, a\*</sup>, V. Pragathi Masamsetti<sup>1</sup>, Jane Q. J. Sun<sup>1</sup>, Kasper Engholm-Keller<sup>3, b</sup>, Pierre  
4 Osteil<sup>1</sup>, Joshua Studdert<sup>1</sup>, Mark E. Graham<sup>3</sup>, Nicolas Fossat<sup>1,2,c\*</sup> and Patrick P.L. Tam<sup>1,2\*</sup>

5

6 <sup>1</sup> Embryology Unit, Children's Medical Research Institute, The University of Sydney, <sup>2</sup> The  
7 University of Sydney, School of Medical Sciences, Faculty of Medicine and Health and <sup>3</sup> Synapse  
8 Proteomics Group, Children's Medical Research Institute, The University of Sydney.

9

10 Present address:

11 <sup>a</sup> Department of Bioengineering, University of California, San Diego, CA, USA.

12 <sup>b</sup> Department of Food Science, University of Copenhagen, Copenhagen, Denmark.

13 <sup>c</sup> Copenhagen Hepatitis C Program (CO-HEP), Department of Immunology and Microbiology,  
14 University of Copenhagen, and Department of Infectious Diseases, Hvidovre Hospital, Denmark.

15

16 \*Co-corresponding authors: Xiaochen Fan (x6fan@ucsd.edu), Nicolas Fossat (nfossat@sund.ku.dk),  
17 Patrick P.L. Tam (ptam@cmri.org.au)

18

19

20

21

22

23

24

25

26

27

## 28 **Abstract**

29 Protein interaction is critical molecular regulatory activity underlining cellular functions and  
30 precise cell fate choices. Using TWIST1 BioID-proximity-labelling and network propagation  
31 analyses, we discovered and characterized a TWIST-chromatin regulatory module (TWIST1-  
32 CRM) in the neural crest cell (NCC). Combinatorial perturbation of core members of TWIST1-  
33 CRM: TWIST1, CHD7, CHD8, and WHSC1 in cell models and mouse embryos revealed that  
34 loss of the function of the regulatory module resulted in abnormal specification of NCCs and  
35 compromised craniofacial tissue patterning. Our results showed that in the course of cranial  
36 neural crest differentiation, phasic activity of TWIST1 and the interacting chromatin regulators  
37 promote the choice of NCC fate while suppressing neural stem cell fates, and subsequently  
38 enhance ectomesenchyme potential and cell motility. We have revealed the connections  
39 between TWIST1 and potential neurocristopathy factors which are functionally interdependent  
40 in NCC specification. Moreover, the NCC module participate in the genetic circuit delineating  
41 dorsal-ventral patterning of neural progenitors in the neuroepithelium.

## 42 **Introduction**

43 The cranial neural crest cell (NCC) lineage originates from the neuroepithelium (Vokes *et al.*,  
44 2007; Groves and Labonne, 2014; Mandalos and Remboutsika, 2017) and contributes to the  
45 craniofacial tissues in vertebrates (Sauka-Spengler and Bronner-Fraser, 2008) including parts  
46 of the craniofacial skeleton, connective tissues, melanocytes, neurons and glia (Kang and  
47 Svoboda, 2005; Blentic *et al.*, 2008; Ishii *et al.*, 2012; Theveneau and Mayor, 2012). The  
48 development of these tissues is affected in neurocristopathies, which can be traced to mutations  
49 in genetic determinants of NCC specification and differentiation (Etchevers *et al.*, 2019). As  
50 an example, mutations in transcription factor *TWIST1* in human are associated with  
51 craniosynostosis (Ghouzzi *et al.*, 2000) and cerebral vasculature defects (Tischfield *et al.*,  
52 2017). Phenotypic analyses of *Twist1* conditional knockout mouse revealed that TWIST1 is  
53 required in the NCCs for the formation of the facial skeleton, the anterior skull vault, and the  
54 patterning of the cranial nerves (Soo *et al.*, 2002; Ota *et al.*, 2004; Bildsoe *et al.*, 2009; Bildsoe  
55 *et al.*, 2016). To comprehend the mechanistic complexity of NCC development and its  
56 implication in a range of diseases, it is essential to collate the compendium of genetic  
57 determinants of the NCC lineage and characterize how they act in concert in time and space.

58 During neuroectoderm development, transcriptional programs are initiated successively in

59 response to morphogen induction to specify neural stem cell (NSC) subdomains along the  
60 dorsal-ventral axis in the neuroepithelium (Briscoe *et al.*, 2000; Vokes *et al.*, 2007; Kutejova  
61 *et al.*, 2016). NCCs also arise from the neuroepithelium, at the border of the surface ectoderm  
62 through pre-epithelial-mesenchymal transition (pre-EMT) which is marked by the activation  
63 of *Twist1*, *Tfap2a*, *Id1*, *Id2*, *Zic1*, *Msx1* and *Msx2* (Baker *et al.*, 1997; Mayor *et al.*, 1997; Saint-  
64 Jeannet *et al.*, 1997; Marchant *et al.*, 1998; Etchevers *et al.*, 2019). In the migratory NCCs,  
65 gene activity associated with pre-EMT and NCC specification is replaced by that of EMT and  
66 NCC identity (Marchant *et al.*, 1998). NCC differentiation progresses in a series of cell fate  
67 decisions (Lasrado *et al.*, 2017; Soldatov *et al.*, 2019). Genetic activities for mutually exclusive  
68 cell fates are co-activated in the progenitor population, which is followed by an enhancement  
69 of the transcriptional activities that predilect one lineage over the others (Lasrado *et al.*,  
70 2017; Soldatov *et al.*, 2019). However, more in-depth knowledge of the factors triggering this  
71 sequence of events and cell fate bias is presently lacking. Furthermore, it is not clear how NCCs  
72 are specified in parallel with other neurogenic cell populations in the neuroepithelium.

73 *Twist1* expression is initiated during NCC specification and its activity is sustained in  
74 migratory NCCs to promote ectomesenchymal fate (Soldatov *et al.*, 2019). TWIST1 mediates  
75 cell fate choices through functional interactions with other basic-helix-loop-helix (bHLH)  
76 factors (Spicer *et al.*, 1996; Firulli *et al.*, 2005; Connerney *et al.*, 2006) in addition to  
77 transcription factors SOX9, SOX10 and RUNX2 (Spicer *et al.*, 1996; Hamamori *et al.*,  
78 1997; Bialek *et al.*, 2004; Laursen *et al.*, 2007; Gu *et al.*, 2012; Vincentz *et al.*, 2013). TWIST1  
79 therefore constitutes a unique assembly point to identify the molecular modules necessary for  
80 cranial NCC development and determine how they orchestrate the sequence of events in this  
81 process.

82 To decipher the molecular context of TWIST1 activity and identify functional modules, we  
83 generated the first TWIST1 protein interactome in NCCs. Leveraging the proximity-dependent  
84 biotin identification (BioID) methodology, we captured TWIST1 interactions in the native  
85 cellular environment including previously intractable transient low-abundance events which  
86 feature interactions between transcription regulators (Roux *et al.*, 2012; Kim and Roux, 2016).  
87 Integrating prior knowledge of protein associations and applying network propagation analysis  
88 (Cowen *et al.*, 2017), we uncovered modules of highly connected interactors as potent NCC  
89 regulators. Among the top-ranked candidates were histone modifiers and chromatin remodelers  
90 that constitute the functional chromatin regulatory module (TWIST1-CRM) in NCC. Genome

91 occupancy, gene expression, and combinatorial perturbation studies of high-ranked members  
92 of the TWIST1-CRM during neurogenic differentiation *in vitro* and in embryos revealed their  
93 necessity in NCC specification and acquisition of ectomesenchyme potential. This study also  
94 identified the concurrent activation and cross-repression of the molecular machinery that  
95 governs the choice of cell fate between neural crest and neurogenic cell lineage.

## 96 **Results**

### 97 **Deciphering the TWIST1 protein interactome in cranial NCCs using BioID**

98 The protein interactome of TWIST1 was characterized using the BioID technique which allows  
99 for the identification of interactors in their native cellular environment (Figure 1A). We  
100 performed the experiment in cranial NCC cell line O9-1 (Ishii *et al.*, 2012) transfected with  
101 TWIST1-BirA\* (TWIST1 fused to the BirA\* biotin ligase). In the transfected cells,  
102 biotinylated proteins were predominantly localized in the nucleus (Figure S1A, B; (Singh and  
103 Gramolini, 2009)). The profile of TWIST1-BirA\* biotinylated proteins were different from  
104 that of biotinylated proteins captured by GFP-BirA\* (Figure S2A). Western blot analysis  
105 detected TCF4, a known dimerization partner of TWIST1, among the TWIST1-BirA\*  
106 biotinylated proteins but not in the control group (Figure S2A). These findings demonstrated  
107 the utility and specificity of the BioID technology to identify TWIST1 interacting proteins.

108 We characterized all the proteins biotinylated by TWIST1-BirA\* and GFP-BirA\* followed by  
109 streptavidin purification using liquid chromatography combined with tandem mass  
110 spectrometry (LC-MS/MS) (Table S1). Differential binding analysis of TWIST1 using sum-  
111 normalized peptide-spectrum match (PSM) values (Figure S2B, C; see Methods) revealed 140  
112 putative TWIST1 interactors in NCCs ( $P < 0.05$ ; Fold-change  $> 3$ ; PSM#  $> 2$ ; Figure 1B, Table  
113 S1). These candidates included 4 of 56 known TWIST1 interactors, including TCF3, TCF4,  
114 TCF12 and GLI3 (overlap odds ratio = 18.05, Chi-squared test p-value = 0.0005; Agile Protein  
115 Interactomes DataServer [APID]) (Alonso-Lopez *et al.*, 2019; Fan *et al.*, 2020).



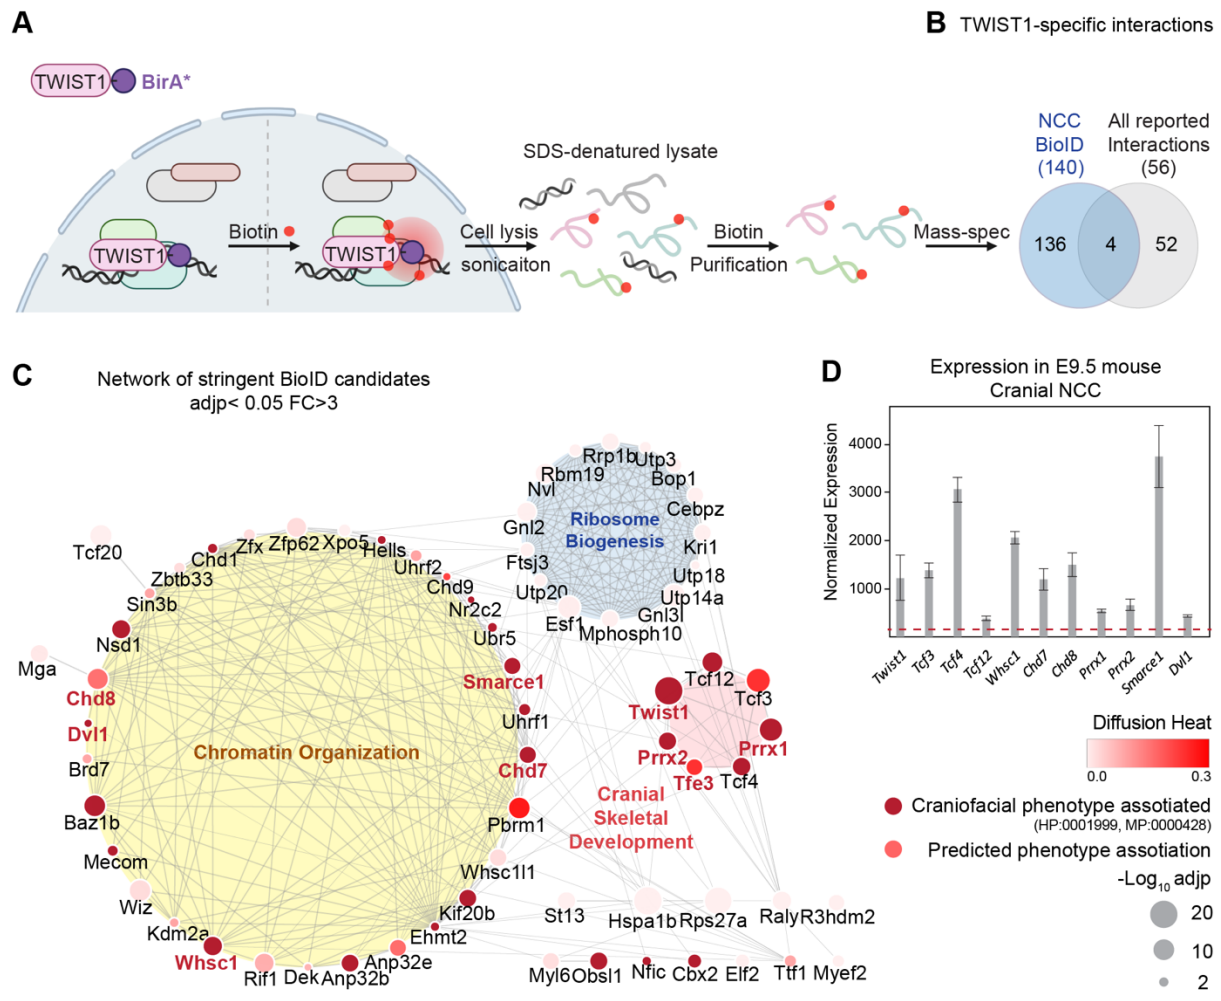

116

117 **Figure 1. TWIST1 interactome in cranial NCCs revealed using BioID and network propagation.**

118 **A.** BioID procedure to identify TWIST1-interacting partners in neural crest stem cells (NCCs).  
 119 TWIST1-BirA\* (TWIST1 fused to the BirA\* biotin ligase) labeled the proteins partners within the 10-  
 120 nm proximity in live cells. Following cell lysis and sonication, streptavidin beads were used to capture  
 121 denatured biotin-labeled proteins, which were purified and processed for mass spectrometry analysis.  
 122 **B.** TWIST1-specific interaction candidates identified by BioID mass-spectrometry analysis in NCC cell  
 123 line ( $P < 0.05$ ; Fold-change > 3; PSM# > 2) overlap with all reported TWIST1 interactions on the Agile  
 124 Protein Interactomes DataServer (APID) (Alonso-Lopez *et al.*, 2019). **C.** Networks constructed from  
 125 stringent TWIST1-specific interaction at a significant threshold of adjusted P-value (adjp) < 0.05 and  
 126 Fold-change > 3. Unconnected nodes were removed. Top GO terms for proteins from three different  
 127 clusters are shown. Node size =  $-\log_{10}(\text{adjp})$ . Genes associated with human and mouse facial  
 128 malformation (HP:0001999, MP:0000428) were used as seeds (dark red) for heat diffusion through  
 129 network neighbors. Node color represents the heat diffusion score. **D.** Expression of candidate interactor  
 130 genes in cranial neural crest from E9.5 mouse embryos; data were derived from published transcriptome  
 131 dataset (Fan *et al.*, 2016). Each bar represents mean expression  $\pm$  SE of 3 biological replicates. All

132 genes shown are expressed at level above the microarray detection threshold (red dashed line).

### 133 **Network propagation prioritized functional modules and core candidates in TWIST1** 134 **interactome**

135 We invoked network propagation analytics to identify functional modules amongst novel  
136 TWIST1 BioID-interactors and to prioritize the key NCC regulators (See Methods). Network  
137 propagation, which is built on the concept of "guilt-by-association", is a set of analytics used  
138 for gene function prediction and module discovery (Sharan *et al.*, 2007; Ideker and Sharan,  
139 2008; Cowen *et al.*, 2017). By propagating molecular and phenotypic information through  
140 connected neighbors, this approach identified and prioritized relevant functional cluster while  
141 eliminating irrelevant ones.

142 The TWIST1 functional interaction network was constructed by integrating the association  
143 probability matrix of the BioID candidates based on co-expression, protein-interaction, and  
144 text mining databases from STING (Singh and Gramolini, 2009; Szklarczyk *et al.*, 2015).  
145 Markov clustering (MCL) was applied to the matrix for the inference of functional clusters  
146 (Figure S2D, Table S2). Additionally, data from a survey of the interaction of 56 transcription  
147 factors and 70 unrelated control proteins were used to distinguish the most likely specific  
148 interactors from the non-specific and the promiscuous TF interactors (Li *et al.*, 2015). Specific  
149 TF interactors (red) and potential new interactors (blue; Figure S2D-i) clustered separately  
150 from the hubs predominated by non-specific interactors (grey; Figure S2D-ii). The stringency  
151 of the screen was enhanced by increasing the statistical threshold (adjusted P-value [adjp] <  
152 0.05) and excluding the clusters formed by non-specific interactors such as those containing  
153 heat shock proteins and cytoskeleton components. Gene Ontology analysis revealed major  
154 biological activities of proteins in the clusters: chromatin organization, cranial skeletal  
155 development, and ribosome biogenesis (Figure 1C; Table S2) (Chen *et al.*, 2009).

156 Heat diffusion was applied to prioritize key regulators of NCC development. The stringent  
157 TWIST1 interaction network comprises proteins associated with facial malformation  
158 phenotypes in human/mouse (HP:0001999, MP:0000428), that points to a likely role in NCC  
159 development. These factors were used as seeds for a heat diffusion simulation to find near-  
160 neighbors of the phenotype hot-spots (i.e. additional factors that may share the phenotype) and  
161 to determine the hierarchical ranking of their importance (Figure 1C, Table S2). Consistent  
162 with the expectation that disease causal factors are highly connected and tend to interact with

163 each other (Jonsson and Bates, 2006), a peak of proteins with high degrees of connectivity  
164 emerged among the top diffusion ranked causal factors, most of which are from the chromatin  
165 organization module (Figure S2F). TWIST1 and these interacting chromatin regulators were  
166 referred to hereafter as the TWIST1-chromatin regulatory module (TWIST1-CRM).

167 Among the top 30 diffusion ranked BioID candidates, we prioritized 9 for further  
168 characterization. These included chromatin regulators that interact with TWIST1 exclusively  
169 in NCCs versus 3T3 fibroblasts: the chromodomain helicases CHD7, CHD8, the histone  
170 methyltransferase WHSC1 and SMARCE1, a member of the SWI/SNF chromatin remodeling  
171 complex (Figure 1C, candidates name in red; Figure S2E, F; Table S3). We also covered other  
172 types of proteins, including transcription factors PRRX1, PRRX2, TFE3 and the cytoplasmic  
173 phosphoprotein DVL1 (Dishevelled 1). The genes encoding these proteins were found to be  
174 co-expressed with *Twist1* in the cranial NCCs of in embryonic day (E) 9.5 mouse embryos  
175 (Figure 1D) (Bildsoe *et al.*, 2016; Fan *et al.*, 2016).

#### 176 **The chromatin regulators interact with the N-terminus domain of TWIST1**

177 Co-immunoprecipitation (co-IP) assays showed that CHD7, CHD8, PRRX1, PRRX2 and DVL1  
178 could interact with TWIST1 like known interactors TCF3 and TCF4, while TFE3 and SMARCE1  
179 did not show any detectable interaction (Figure 2A). Fluorescent immunostaining  
180 demonstrated that these proteins co-localized with TWIST1 in the nucleus (Figure S1C). The  
181 exceptions were DVL1 and TFE3, which were localized predominantly in the cytoplasm (Figure  
182 S1C). Among these candidates, CHD7 and CHD8 are known to engage in direct domain-specific  
183 protein-protein interactions (Batsukh *et al.*, 2010). Three sub-regions of CHD7 and CHD8 were  
184 tested for interaction with TWIST1 (Figure 2B). For both proteins, the p1 region, which  
185 encompasses helicases and chromodomains, showed no detectable interaction with partial  
186 or full-length TWIST1. In contrast, the p2 and the p3 regions of CHD7 and CHD8 interacted  
187 with full-length TWIST1 as well as with its N-terminal region (Figure 2C). Reciprocally, the  
188 interaction was tested with different regions of TWIST1 including the bHLH domain, the WR  
189 domain, the C-terminal region and the N-terminal region (Figure 2B). CHD7, CHD8 and WHSC1  
190 interacted preferentially with the TWIST1 N-terminus whereas the TCF dimerization partners  
191 interacted specifically with the bHLH domain (Figure 2D). Consistent with the co-IP result,  
192 SMARCE1 and TFE3 did not interact with TWIST1. Interestingly, the other known factor that  
193 binds the TWIST1 N-terminal region is the histone acetyltransferase CBP/P300 which is also

194 involved in chromatin remodeling (Hamamori *et al.*, 1999). These findings demonstrated  
 195 direct interaction of TWIST1 with a range of epigenetic factors and transcriptional regulators  
 196 and identified the TWIST1 N-terminal region as the domain of contact.

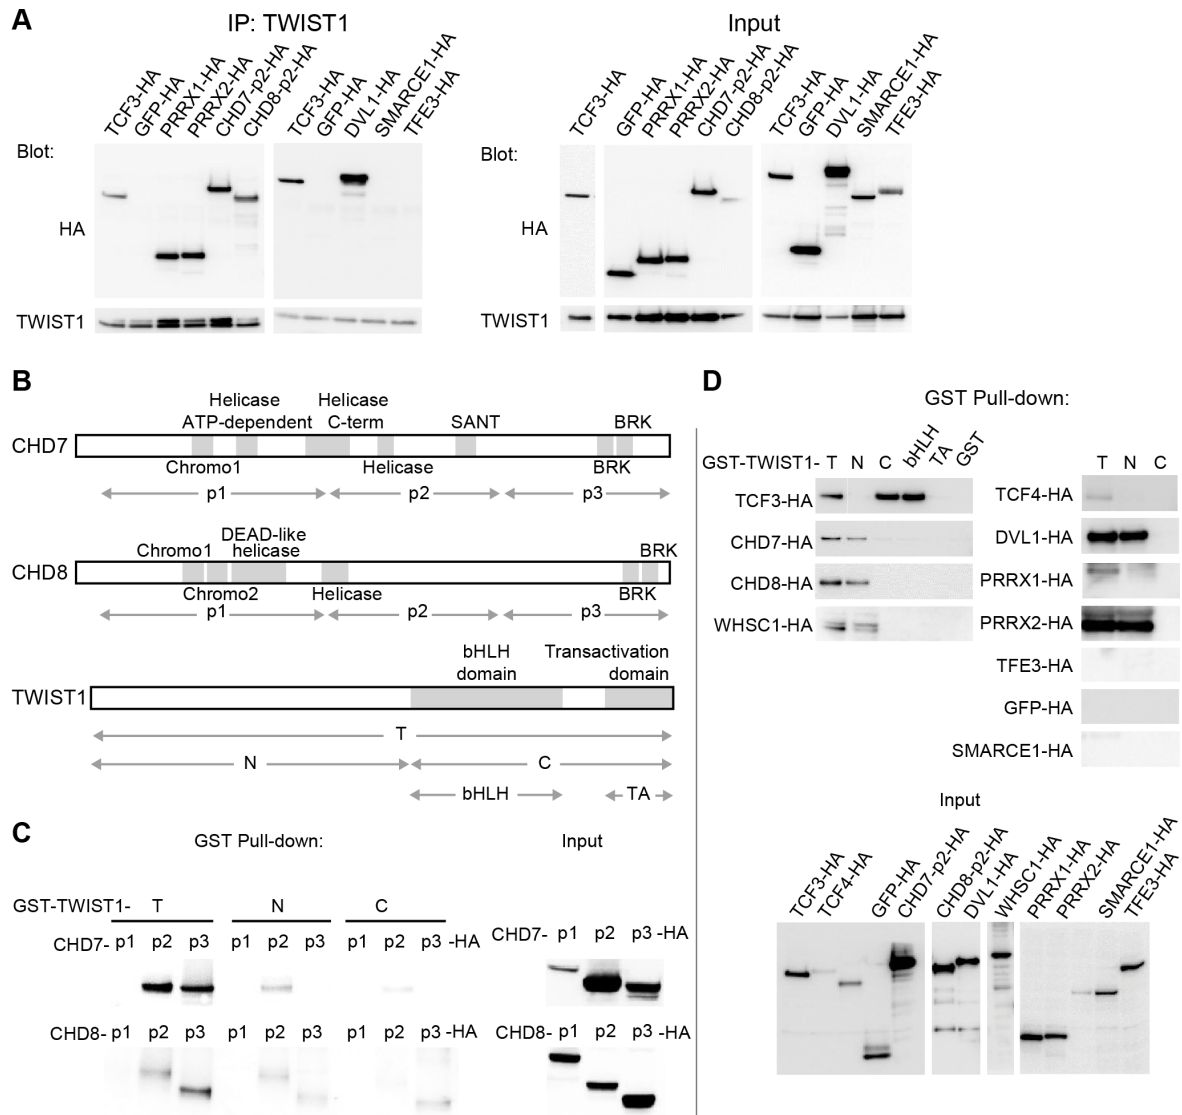

197

198 **Figure 2. The chromatin regulators interact with the N-terminus domain of TWIST1.** A. Detection  
 199 of HA-tagged proteins after immunoprecipitation (IP) of TWIST1 (IP:  $\alpha$ -TWIST1) from lysates of cells  
 200 transfected with constructs expressing TWIST1 (input blot:  $\alpha$ -TWIST1) and the HA-tagged proteins  
 201 partners (input blot:  $\alpha$ -HA). B. Schematics of CHD7, CHD8 and TWIST1 proteins showing the known  
 202 domains (grey blocks) and the regions (double arrows) tested in the experiments shown in panels C and  
 203 D. C, D. Western blot analysis of HA-tagged proteins ( $\alpha$ -HA antibody) after GST-pulldown with  
 204 different TWIST1 domains (illustrated in B). Protein expression in the input is displayed separately. T,  
 205 full-length TWIST1; N, N-terminal region; C, C-terminal region; bHLH, basic helix-loop-helix domain;  
 206 TA, transactivation domain.

## 207 Genetic interaction of *Twist1* and chromatin regulators in craniofacial morphogenesis

208 The function of the core components of the TWIST1-CRM was investigated *in vivo* using  
209 mouse embryos derived from ESCs that carried single-gene or compound heterozygous  
210 mutations of *Twist1* and the chromatin regulators. Mutant ESCs for *Twist1* and the three  
211 validated NCC-exclusive chromatin regulatory partners *Chd7*, *Chd8* and *Whsc1* were  
212 generated by CRISPR-Cas9 editing (Figure S3A, B) (Ran *et al.*, 2013). ESCs of specific  
213 genotype (non-fluorescent) were injected into 8-cell host wildtype embryos (expressing  
214 fluorescent DsRed.t3) and chimeras were collected at E9.5 or E11.5 (Figure 3A) (Sibbritt *et*  
215 *al.*, 2019). Only embryos with predominant contribution of mutant ESCs, indicated by absence  
216 or low level of DsRed.t3 fluorescence were analyzed. The majority of embryos derived from  
217 single-gene heterozygous ESCs (*Twist1*<sup>+/-</sup>, *Chd7*<sup>+/-</sup>, *Chd8*<sup>+/-</sup> and *Whsc1*<sup>+/-</sup>) displayed mild  
218 deficiency in the cranial neuroepithelium and focal vascular hemorrhage (Figure 3B).  
219 Compound heterozygous embryos (*Twist1*<sup>+/-</sup>;*Chd7*<sup>+/-</sup>, *Twist1*<sup>+/-</sup>;*Chd8*<sup>+/-</sup> and *Twist1*<sup>+/-</sup>;*Whsc1*<sup>+/-</sup>)  
220 displayed more severe craniofacial abnormalities and exencephaly (Figure 3B, C).

221 In view of that CHD8 was not previously known to involve in craniofacial development of the  
222 mouse embryo, we focused on elucidating the impact of genetic interaction of *Chd8* and *Twist1*  
223 on NCC development *in vivo*. While *Chd8*<sup>+/-</sup> embryos showed incomplete neural tube closure,  
224 compound *Twist1*<sup>+/-</sup>;*Chd8*<sup>+/-</sup> embryos displayed expanded neuroepithelium, a phenotype not  
225 observed in the single-gene mutants (Figure 3B, E). The population of NCCs expressing  
226 TFAP2 $\alpha$ , a TWIST1-independent NCC marker (Brewer *et al.*, 2004) was reduced in the  
227 frontonasal tissue and the trigeminal ganglion (Figure 3E-i, F). In contrast, SOX2 expression  
228 was upregulated in the ventricular zone of the neuroepithelium of mutant chimeras (Figure 3E-  
229 ii, iii, G). Furthermore, *Twist1*<sup>+/-</sup>, *Chd8*<sup>+/-</sup> and *Twist1*<sup>+/-</sup>;*Chd8*<sup>+/-</sup> embryos displayed different  
230 degrees of hypoplasia of the NCC-derived cranial nerves (Figure 3H). Cranial nerves III and  
231 IV were absent, and nerve bundle in the trigeminal ganglia showed reduced thickness (Figure  
232 3H, I) most evidently in the *Twist1*<sup>+/-</sup>;*Chd8*<sup>+/-</sup> compound mutant embryos (Figure 3F-v,v', I).  
233 Altogether, these results suggested that TWIST1 genetically interaction with epigenetic  
234 regulators CHD7, CHD8 and WHSC1 to guide the formation of the cranial NCC and  
235 downstream tissue genesis *in vivo*.



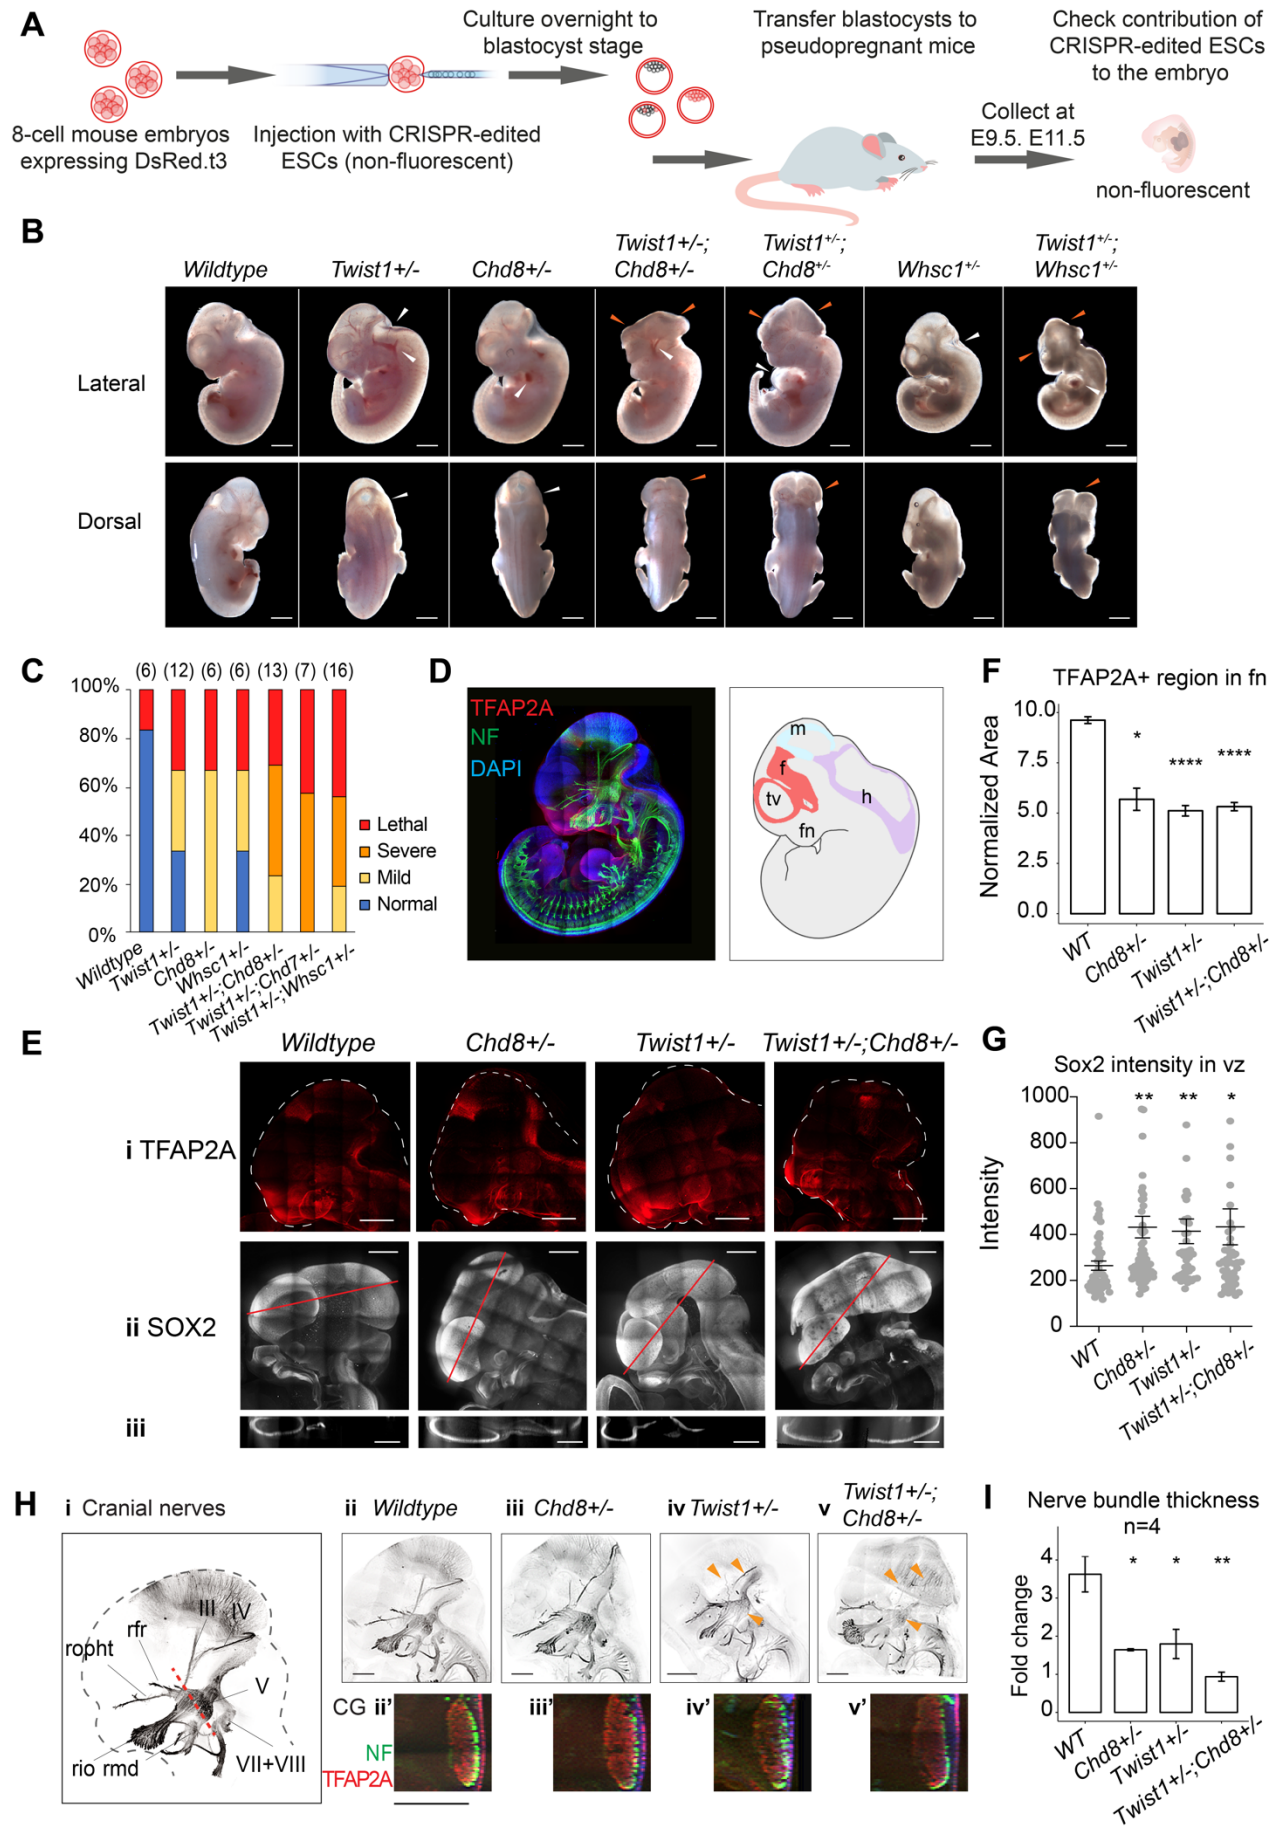

237 **Figure 3. Genetic interaction of Twist1 and chromatin regulators in craniofacial morphogenesis.**  
238 **A.** Experimental strategy for generating chimeric mouse from WT and mutant ESCs (see Methods). **B.**  
239 Lateral and dorsal view of mid-gestation chimeric embryos with predominant ESC contribution  
240 (embryo showing low red fluorescence). Genotype of ESC used for injection is indicated. Scale bar:  
241 1mm. Heterozygous embryos of single genes (*Twist1*<sup>+/-</sup>, *Chd8*<sup>+/-</sup>, *Whsc1*<sup>+/-</sup>) showed mild defects  
242 including hemorrhages and mild neural tube defect (white arrows). Compound heterozygous embryos  
243 displayed open neural tube and head malformation (orange arrows, n ≥ 6 for each genotype), in addition  
244 to heart defects. **C.** Proportions of normal and malformed embryos (Y-axis) for each genotype (X-axis).  
245 Severity of mutant phenotypes was determined based on the incidence of developmental defects in  
246 neuroepithelium, midline tissues, heart and vasculature: Normal (no defect); Mild (1-2 defects); Severe  
247 (3-4 defects) and early lethality. The number of embryos scored for each genotype is in parentheses. **D.**  
248 Whole-mount immunofluorescence of E11.5 chimeras derived from wildtype ESCs, shows the  
249 expression of TFAP2A (red) and neurofilament (NF, green) and cell nuclei by DAPI (blue). Schematic  
250 on the right shows the neuroepithelium structures: f, forebrain; m, midbrain; h, hindbrain; tv,  
251 telencephalic vesicle; fn, frontonasal region. **E. i.** NCC cells, marked by TFAP2A, and neuroepithelial  
252 cells, marked by SOX2, are shown in **ii.** sagittal and **iii.** transverse view of the craniofacial region (red  
253 dashed line in **ii:** plane of section). **F.** Quantification of frontal nasal TFAP2A<sup>+</sup> tissues (mean  
254 normalized area +/- SE) of three different sections for each genotype. **G.** SOX2 intensity (mean +/- SE)  
255 in the ventricular zone of three sections for each genotype were quantified using IMARIS. **H. i.** Cranial  
256 nerve structures were visualized by immuno-staining of neurofilament (NF). **ii-v** maximum projection  
257 of cranial nerves in embryos. Missing or hypoplastic neurites are indicated by arrowheads. **ii'-v'** cross-  
258 section of neurofilament bundles at trigeminal ganglion (V). Red dashed line in **i:** plane of section. Bar:  
259 500 μm; V, trigeminal ganglion; III, IV, VII, VIII; rio, infraorbital nerve of V2; rmd, mandibular nerve;  
260 ropht, ophthalmic profundal nerve of V1; rfr, frontal nerve. **I.** Thickness of neural bundle in the  
261 trigeminal ganglion was measured by the GFP positive area, normalized against area of the trigeminal  
262 ganglion (TFAP2A<sup>+</sup>). Values plotted represent mean fold change +/- SE. Each condition was compared  
263 to *WT*. P-values were computed by one-way ANOVA. \*P < 0.05, \*\*P < 0.01, \*\*\*P < 0.001, \*\*\*\* P <  
264 0.0001. ns, not significant.

### 265 **Genomic regions co-bound by TWIST1 and chromatin regulators are enriched for** 266 **active regulatory signatures and neural tube patterning genes**

267 The phenotypic data so far indicate that the combined activity of TWIST1-chromatin regulators  
268 might be required for the establishment of NCC identity. To examine whether TWIST1-  
269 chromatin regulators are required for NCC specification from the neuroepithelium and to  
270 pinpoint its primary molecular function in early neural differentiation, we performed an  
271 integrative analysis of ChIP-seq datasets of the candidates. The ChIP-seq dataset for TWIST1



272 was generated from the ESC-derived neuroepithelial cells (NECs) which are progenitors of  
273 NCCs (Figure S4 and Methods). We retrieved published NEC ChIP-seq datasets for CHD7 and  
274 CHD8 and the histone modifications and reanalysed the data following the ENCODE pipeline  
275 (Consortium, 2012; Sugathan et al., 2014; Ziller et al., 2015) (Figure S4A). Two H3K36me3  
276 ChIP-seq datasets for NECs were included in the analysis on the basis that WHSC1 trimethyl  
277 transferase targets several H3 lysine (Morishita *et al.*, 2014) and catalyzes H3K36me3  
278 modification *in vivo* (Nimura *et al.*, 2009).

279 Genome-wide co-occupancies of TWIST1, CHD7 and CHD8 showed significant overlap  
280 (Fisher's exact test) and clustered by Jaccard Similarity matrix (Figure 4A). ChIP-seq peaks  
281 were correlated with active histone modifications H3K27ac and H3K4me3 but not the inactive  
282 H3K27me3, or the WHSC1-associated H3K36me3 modifications (Figure 4A). TWIST1,  
283 CHD7 and CHD8 shared a significant number of putative target genes (Figure 4B). TWIST1  
284 shared 63% of target genes with CHD8 (odds ratio = 16.93, Chi-squared test p-value < 2.2e-  
285 16) and 18% with CHD7 (odds ratio = 8.26, p-value < 2.2e-16; Figure 4B; Table S4).  
286 Compared with genomic regions occupied by no or only one factor, greater percentage of  
287 regions with peaks for two or all three factors (TWIST1, CHD7 and CHD8) showed H3K27ac  
288 and H3K4me3 signal (Figure 4C). This trend was not observed for the H3K27me3 modification.  
289 Similarly, the co-occupied transcription start sites (TSS) showed active chromatin signatures  
290 with enrichment of H3K4me3 and H3K27Ac and depletion of H3K27me3 (Ernst *et al.*,  
291 2011; Rada-Iglesias *et al.*, 2011)(Figure 4D, E). We also did not observe H3K36me3  
292 modifications near the overlapping TSSs, suggesting that WHSC1 may have alternative histone  
293 lysine specificity in the NECs.

294 The top Gene Ontology enriched for the co-occupied regulatory regions of 2 or 3 core  
295 components included neural tube patterning, cell migration and BMP signaling pathway  
296 (Figure 4F). Regions with single factor binding sites were specifically enriched for different  
297 sets of ontology such as negative regulation of nervous system and muscle development.  
298 Overlapping peaks of the partners were localized within +/- 1 kb of the TSS of common target  
299 genes (Figure 4G; Table S4). This integrative analysis revealed that the TWIST1-chromatin  
300 regulators shared genomic targets that are harbored in open chromatin regions in the NECs.  
301 Therefore, combinatorial binding sites for TWIST1, CHD7 and CHD8 may confer specificity  
302 for regulation of patterning genes in the NECs.

303

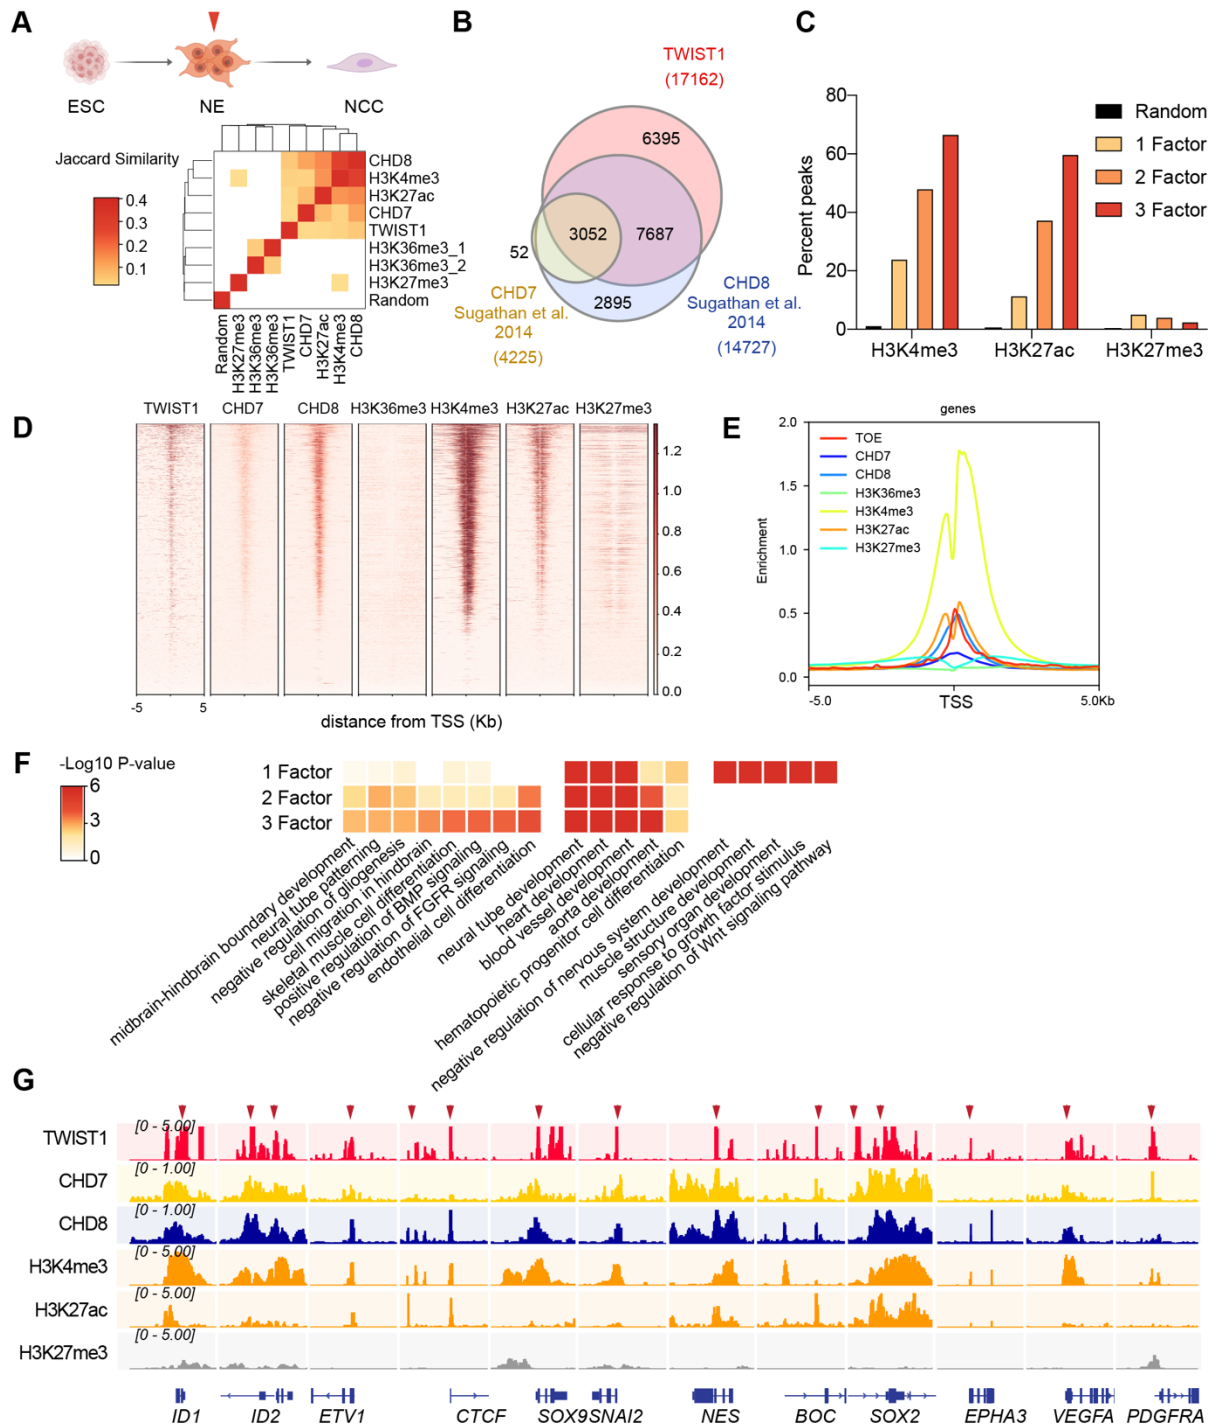

304

305 **Figure 4. Genomic region showing overlapping binding of TWIST1 and partners are enriched**  
 306 **for active regulatory signatures and neural tube patterning genes.** **A.** Top panel: Trajectory of ESC  
 307 differentiation to neuroepithelial cells (NECs) and NCCs. Bottom panel: Jaccard Similarity matrix  
 308 generated of CHIP-seq data of TWIST1, CHD7, CHD8 and histone modifications from NE cells. The  
 309 Jaccard correlation is represented by a color scale. White squares indicate no significant correlation  
 310 ( $P < 0.05$ , fisher's exact test) or odds ratio  $< 10$  between the two datasets. **B.** Venn diagram showing  
 311 overlaps of putative direct target of TWIST1, CHD7, and CHD8, based on CHIP-seq datasets for NE

312 cells (Sugathan *et al.*, 2014). **C.** Percent genomic region that is marked by H3K4me3, H3K27ac and  
313 H3K27me3 among regions bound by one, two or all three factors among TWIST1, CHD7 and CHD8.  
314 Randomized peak regions of similar length (1 kb) were generated for hg38 as a control. **D.** Heatmaps  
315 of genomic footprint of protein partners at +/- 5kb from the TSS, based on the ChIP-seq datasets (as in  
316 A) and compared with histone marks H3K4me3, H3K27ac and H3K27me3 in human neural progenitor  
317 cells (Ziller *et al.*, 2015). TSS lanes with no overlapping signals were omitted. **E.** ChIP-seq density  
318 profile (rpkm normalized) for all TSS flanking regions shown in D. **F.** Gene Ontology analysis of  
319 genomic regulatory regions by annotations of the nearby genes. Regions were grouped by presence of  
320 binding site of individual factor (TWIST1, CHD7 and CHD8), or combinatorial binding of 2 or 3  
321 factors. The top non-redundant developmental processes or pathways for combinatorial binding peaks  
322 or individual factor binding peaks are shown. P-value cut-off: 0.05. **G.** IGV track (Robinson *et al.*,  
323 2011) showing ChIP-peak overlap (red arrows) at common transcriptional target genes in neurogenesis  
324 and cell mobility in NCC development. Gene diagrams are indicated (bottom row).

## 325 **TWIST1 is required for the recruitment of CHD8 to the regulatory region of target** 326 **genes**

327 To examine whether TWIST1 is necessary to recruit partner proteins to specific regions of co-  
328 regulated genes or vice versa, we examined chromatin binding of the endogenous proteins in  
329 NECs by ChIP-qPCR analysis (Figure 5A). As CHD8 correlate best with TWIST1 in their  
330 ChIP-seq profile surrounding TSS, we analyzed the pattern of recruitment of TWIST1 and  
331 CHD8 at the shared peaks near *Sox2*, *Epha3*, *Pdgfra* and *Vegfa* (Figure 4G). One of the peaks  
332 near the *Sox2* TSS demonstrated binding by both TWIST1 and CHD8 (Figure 5A, B). In  
333 *Twist1*<sup>+/-</sup> or *Chd8*<sup>+/-</sup> NECs, the binding of TWIST1 or CHD8 at the peak were reduced.  
334 Interestingly, *Twist1*<sup>+/-</sup> mutation also diminished the binding of CHD8 yet *Chd8*<sup>+/-</sup> mutation  
335 did not affect TWIST1 binding (Figure 5A). For *Epha3*, *Vegfa* and *Pdgfra*, peaks identified by  
336 ChIP-seq with H3K4me3 or H3K27ac modifications were tested (Figure 4G). Partial loss of  
337 *Twist1* significantly affected the recruitment of both TWIST1 and CHD8 but again, the loss of  
338 CHD8 only affected its own binding (Figure 5C-E). These findings support that TWIST1  
339 binding is a prerequisite for the recruitment of CHD8.

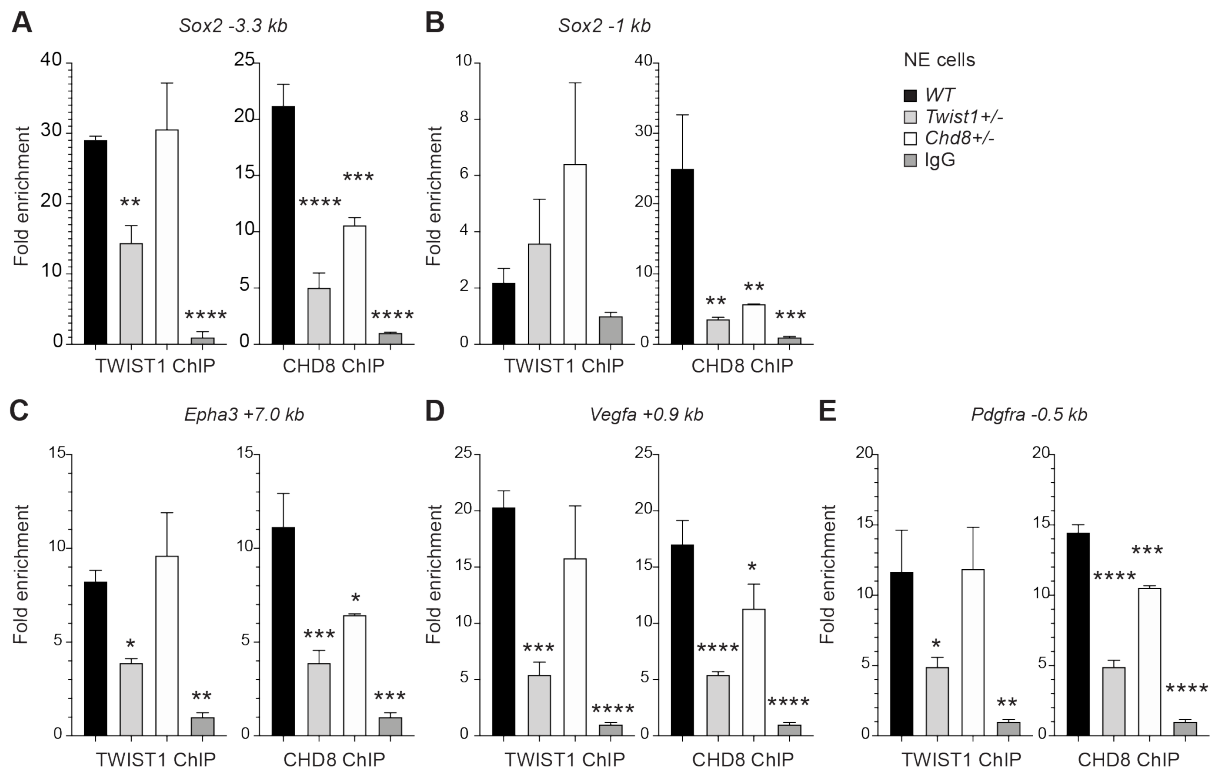

340

341 **Figure 5. TWIST1 is required for the recruitment of CHD8 to the regulatory region of target**  
 342 **genes.** Binding of endogenous TWIST1 and CHD8 to overlapping genomic peak regions called by  
 343 MACS2 ( $q < 0.05$ ) were assessed by ChIP-qPCR. **A-E.** qPCR quantification of genomic DNA from  
 344 ChIP of endogenous TWIST1 or CHD8 proteins are shown as mean fold enrichment  $\pm$  SE. ChIP  
 345 experiments using anti-TWIST1 or anti-CHD8 antibodies against endogenous proteins were performed  
 346 on *wildtype* (*WT*), *Twist1*<sup>+/-</sup> and *Chd8*<sup>+/-</sup> NECs derived from ESC (n = 3, day 3). qPCR results were  
 347 normalized against signal from non-binding negative control region and displayed as fold change  
 348 against IgG control. Each condition was compared against *WT* and P-values were generated using one-  
 349 way ANOVA. \*P < 0.05, \*\*P < 0.01, \*\*\*P < 0.001, \*\*\*\*P < 0.0001. ns, not significant.

### 350 **The TWIST1-chromatin regulators are necessary for cell migration and NCC** 351 **ectomesenchyme potential**

352 As the TWIST1 and partners were found to regulate cell migration and BMP signaling  
 353 pathways through target gene binding, we again took a loss-of-function approach and examined  
 354 the synergic function of TWIST1-chromatin regulatory factors on cell motility in both NECs  
 355 and NCCs. The migration of NECs out of their colonies was captured by time-lapse imaging  
 356 and were quantified (see Methods). While *Chd7*<sup>+/-</sup>, *Chd8*<sup>+/-</sup> and *Whsc1*<sup>+/-</sup> mutant cells displayed  
 357 marginally reduced motility, the motility of the *Twist1*<sup>+/-</sup> cells was compromised and further  
 358 reduced in *Twist1*<sup>+/-</sup>; *Chd7*<sup>+/-</sup>, *Twist1*<sup>+/-</sup>; *Chd8*<sup>+/-</sup>, and *Twist1*<sup>+/-</sup>; *Whsc1*<sup>+/-</sup> compound mutant cells

359 (Figure 6A, B).

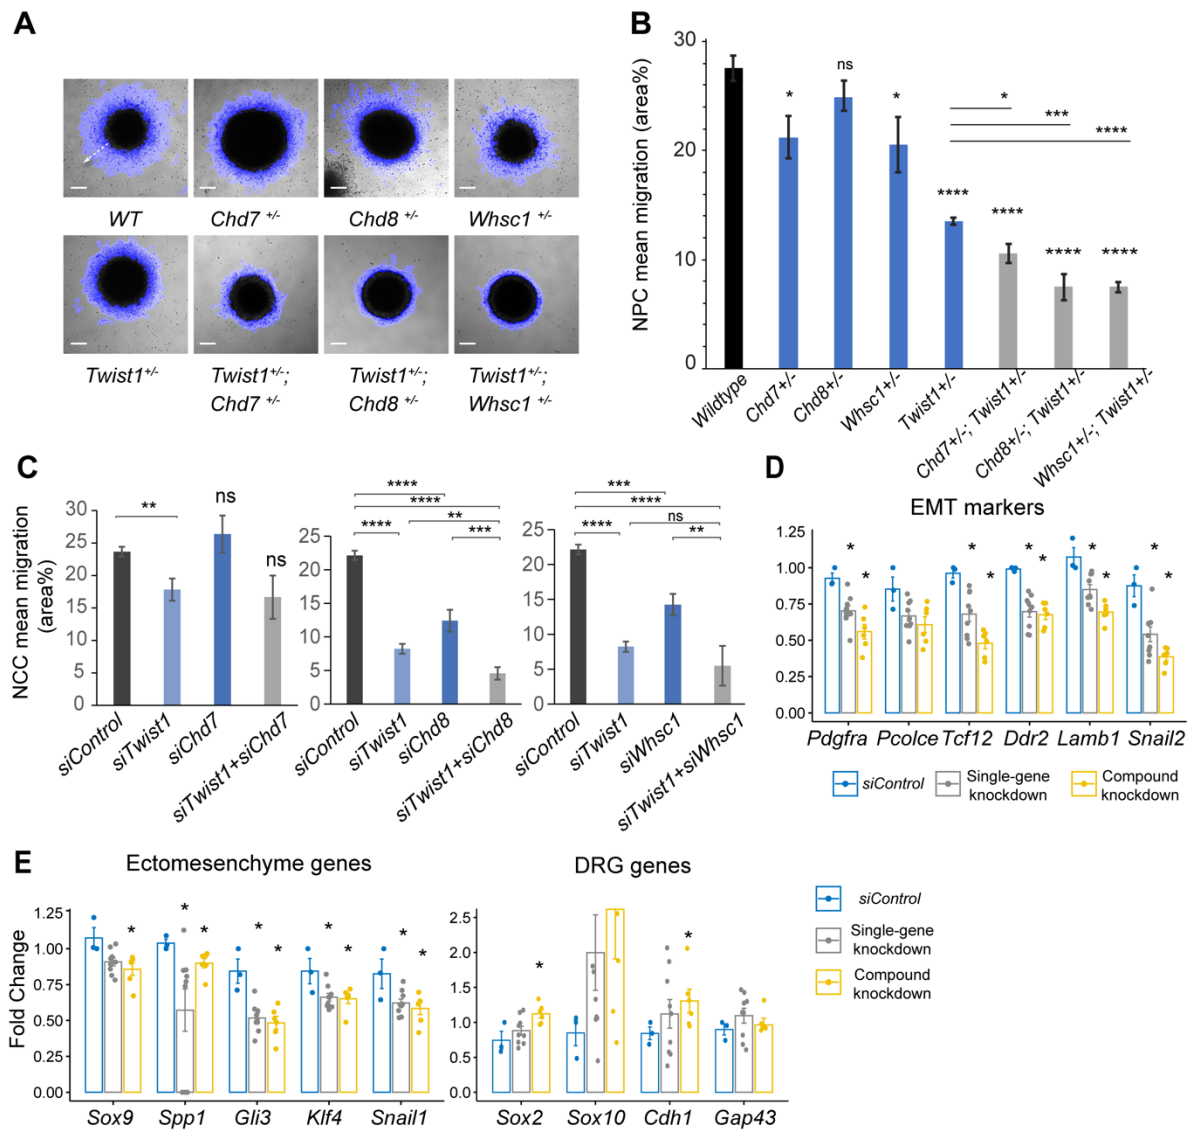

360

361 **Figure 6. The TWIST1-chromatin regulators are necessary for cell migration and the NCC**  
 362 **ectomesenchyme potential. A.** Dispersion of cells from the colony over 10 hours period *in vitro* (blue  
 363 halo area). White arrow (shown in wildtype, *WT*) indicates the centrifugal cell movement. Bright-field  
 364 time-lapse images were captured at set tile regions. Bar = 0.2 mm **B.** Cell migration over 10 hours was  
 365 quantified from time-lapse imaging data and plotted as mean area % +/- SE for each cell type. n = 5 for  
 366 each genotype. P-values computed by one-way ANOVA with Holm-sidak post-test. **C.** Results of the  
 367 scratch assay of O9-1 cells with siRNA knockdowns of *Twist1*, *Chd7*, *Chd8*, *Whsc1* and control siRNA.  
 368 Bright-field images were captured at set tile regions every 15 mins over a 10-hour period. Cell migration  
 369 was measured as mean area % traversed +/- SE, in triplicate experiments for each genotype. Each  
 370 condition was compared to *WT*. P-values computed by one-way ANOVA. \*P < 0.05, \*\*P < 0.01, \*\*\*P  
 371 < 0.001, \*\*\*\* P < 0.0001. ns, not significant. **D, E.** RT-qPCR quantification of expression of genes



372 associated with EMT, ectomesenchyme, and genes upregulated in the dorsal root ganglia (DRG) vs  
373 ectomesenchyme in NCCs. Gene expression is represented as fold change against control +/- SE. Bar  
374 diagram shows the expression fold changes in cells treated with *siRNA* individually for *Twist1/Chd8* or  
375 *Whsc1* (grey bar) and *siRNA* for *Twist1* in combination with *Chd8* or *Whsc1* (yellow bar). Expression  
376 were normalized with the average expression of 3 housekeeping genes (*Gapdh*, *Tbp*, *Actb*). Each group  
377 was compared to control knockdown treatment. P-values computed by one-way ANOVA. \*P < 0.05.

378 The migratory capacity was also evaluated in O9-1 cells, which are developmentally equivalent  
379 to ectomesenchymal NCCs (Ishii *et al.*, 2012). NCCs were treated with *siRNA* to knockdown  
380 *Chd7*, *Chd8* and *Whsc1* activity individually (single-gene knockdown) and in combination with  
381 *Twist1-siRNA* (compound knockdown; Figure S3C, see Methods). NCCs treated with *Chd8-*  
382 *siRNA* or *Whsc1-siRNA* but not *Chd7-siRNA* showed impaired motility (relative to control-  
383 *siRNA* treated cells), which was exacerbated by the additional knockdown of *Twist1* (Figure  
384 6C). Impaired motility in *Twist1*, *Chd8* and *Whsc1* knockdowns was accompanied by reduced  
385 expression of EMT genes (*Pdgfra*, *Pcolce*, *Tcf12*, *Ddr2*, *Lamb1* and *Snai2*) (Figure 6D, S3D)  
386 and ectomesenchyme markers (*Sox9*, *Spp1*, *Gli3*, *Klf4*, *Snai1*), while genes that are enriched in  
387 the sensory neurons located in the dorsal root ganglia (Ishii *et al.*, 2012) were upregulated  
388 (*Sox2*, *Sox10*, *Cdh1*, *Gap43*; Figure 6E). Combined knockdowns had a stronger impact on the  
389 expression of the target genes than individual knockdowns for *Twist1*, *Chd8* and *Whsc1*  
390 (Figures 6D, E; S3D). These findings suggest that the acquisition of ectomesenchyme  
391 propensity (cell mobility, EMT and mesenchyme differentiation) requires the activity of  
392 TWIST1-CHD8/WHSC1.

### 393 **TWIST1 and chromatin regulators for cell fate choice in neuroepithelial cells and** 394 **lineage trajectory of neural crest cells**

395 The genomic and embryo phenotypic data collectively suggest a requirement of TWIST1-  
396 chromatin regulators in the establishment of NCC identity in heterogeneous neuroepithelial  
397 populations. To understand how TWIST1-chromatin regulators coordinates NCC and other  
398 identities during neural differentiation, we studied the module factors during *in vitro* neural  
399 differentiation of ESCs. We assessed the lineage propensity of neuroepithelial cells derived  
400 from single-gene heterozygous ESCs (*Twist1*<sup>+/-</sup>, *Chd7*<sup>+/-</sup>, *Chd8*<sup>+/-</sup> and *Whsc1*<sup>+/-</sup>) and compound  
401 heterozygous ESCs (*Twist1*<sup>+/-</sup>;*Chd7*<sup>+/-</sup>, *Twist1*<sup>+/-</sup>;*Chd8*<sup>+/-</sup> and *Twist1*<sup>+/-</sup>;*Whsc1*<sup>+/-</sup>). ESCs were  
402 cultured in neurogenic differentiation media, followed by selection and expansion of NECs  
403 (Figure 7A) (Bajpai *et al.*, 2010; Varshney *et al.*, 2017). Samples were collected at day 0

404 (ESCs), day 3 and day 12 of differentiation and assessed for the expression of cell markers and



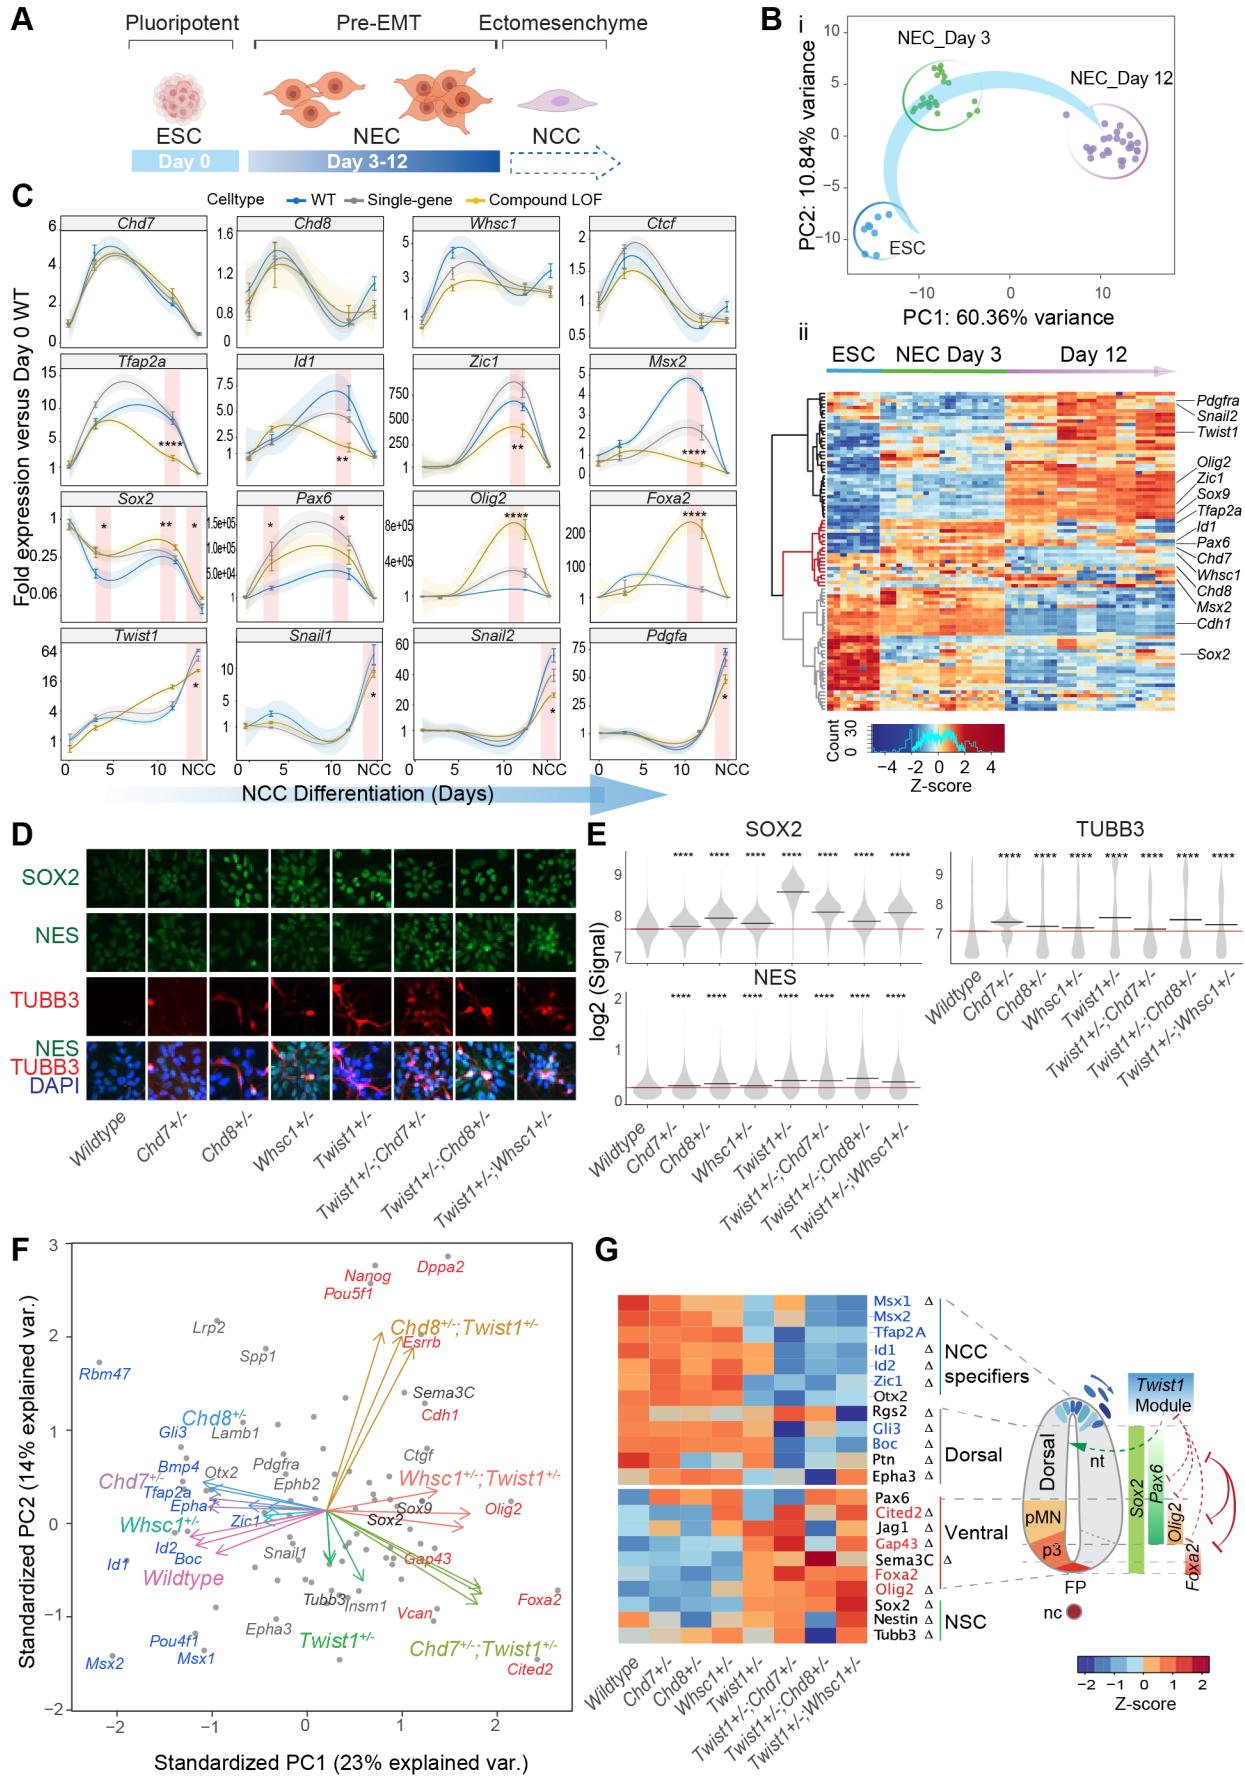

405

406 **Figure 7. The TWIST1-chromatin regulators predispose NCC propensity and facilitates dorsal-**

407 **ventral neuroepithelial specification.** **A.** Experimental strategy of neural differentiation *in vitro*  
408 (Bajpai *et al.*, 2010; Varshney *et al.*, 2017). **B.** i. Principal component analysis (PCA) of the Fluidigm  
409 high-throughput qPCR data for all cell lines collected as ESC, and neuroepithelial cells (NECs) at day  
410 0, day 3 and day 12 of differentiation, respectively. Differentiation trajectory from ESC to NEC is  
411 shown for the first two PC axes. ii. Heatmap clustering of normalized gene expressions for all cell lines:  
412 n=3 for each genotype analyzed at day 3 and day 12 of neuroepithelium differentiation and n=1 for  
413 ESCs. Clusters indicate activated (black), transiently activated (red) and repressed (grey) genes during  
414 neural differentiation. Z-score (color-coded) is calculated from log<sub>2</sub> transformed normalized expression.  
415 **C.** Profiles of expression of representative genes during neural differentiation (day 0 to NCC). Mean  
416 expression +/- standard error (SE) are plotted for wildtype, single-gene heterozygous (average of  
417 *Twist1*<sup>+/-</sup>, *Chd7*<sup>+/-</sup>, *Chd8*<sup>+/-</sup> and *Whsc1*<sup>+/-</sup>) or compound heterozygous (average of *Twist1*<sup>+/-</sup>;*Chd7*<sup>+/-</sup>,  
418 *Twist1*<sup>+/-</sup>;*Chd8*<sup>+/-</sup> and *Twist1*<sup>+/-</sup>;*Whsc1*<sup>+/-</sup>) groups. For NCCs, samples were collected O9-1 cells with  
419 siRNA knockdown of single-gene or combinations of *Twist1* and one of the partners. Gene expression  
420 were normalized against the mean expression value of 3 housekeeping genes (*Gapdh*, *Tbp*, *Actb*), and  
421 then the expression of day 0 wildtype ESCs. Shading of trend line represents 90% confidence interval.  
422 Red stripes indicate stages when target genes expressions were significantly affected by the double  
423 knockdown. P-values were calculated using one-way ANOVA. \*P < 0.05, \*\*P < 0.01, \*\*\*P < 0.001,  
424 \*\*\*\* P < 0.0001. ns, not significant. **D.** Immunofluorescence of SOX2 and selected NSC markers and  
425 **E.** quantification of signal intensity +/- SE in single cells of indicated genotypes (X-axis). P-values were  
426 generated using one-way ANOVA with Holm-sidak post-test. \*P < 0.05, \*\*P < 0.01, \*\*\*P < 0.001,  
427 \*\*\*\* P < 0.0001. **F.** PCA plot of the NECs (day 12) showing genes with highest PC loadings (blue =  
428 top 10 loading, red = bottom 10 loading), and vector of each genotype indicating their weight on the  
429 PCs. **G.** Heatmap of genes associated with pattern specification in dorsal-ventral axis of the  
430 neuroepithelium: NCC specifiers, dorsal-, ventral-, pan-NSC in mutant versus wildtype NECs.  
431 Progenitor identities along the neural tube, the reported master TFs and the co-repression (red solid line)  
432 of dorsal and ventral progenitors (pMN, p3 and FP) are illustrated on the right (Briscoe *et al.*,  
433 2000; Alaynick *et al.*, 2011; Kutejova *et al.*, 2016). Repression (red) or promotion (green) of cell fates  
434 by TWIST1-module based on the perturbation data are indicated in dashed lines. FP, floor plate; nc,  
435 notochord; nt, neural tube. Genes with highest PC loadings were indicated in same colors as in D. Z-  
436 scores (color-coded) were calculated from Log<sub>2</sub> fold-change against wildtype cells. Changes in gene  
437 expressions were significant (by one-way ANOVA). Genes identified as target in at least two ChIP-seq  
438 datasets among TWIST1, CHD7 and CHD8 are labelled with Δ.

439 ChIP-seq target genes (Table S5). All cell lines progressed in the same developmental  
440 trajectory (Figure 7B-i) and generated Nestin-positive rosettes typical of NECs (Figure 7D).  
441 Genes were clustered into three groups by patterns of expression: activation, transient  
442 activation, and repression (Figure 7B ii, black, red, grey clusters). Notably, *Chd7*, *Chd8* and

443 *Whsc1* clustered with NCC specifiers that were activated transiently during differentiation  
444 (Figure 7B ii, red).

445 Gene expression profile of the knockout mutant cells (Figure 7C) were analyzed in conjunction  
446 with the gene expression data from NCCs treated with siRNA (representing the “established  
447 NCCs”). In the wildtype cells, *Chd7*, *Chd8*, *Whsc1* as well as ChIP target *Ctcf*, which encodes  
448 a zinc-finger DNA-binding protein that regulates distal promoter-enhancer interactions  
449 (Ghirlando and Felsenfeld, 2016), were expressed early in NEC differentiation (Figure 7C, top  
450 row). This was followed by an incline in the expression of NCC specifiers (*Tfap2a*, *Id1*, *Zic1*  
451 and *Msx2*; Figure 7C, second row) and transcription factors (TFs) associated with NSCs (*Sox2*,  
452 *Pax6*, *Olig2*, and *Foxa2*; Figure 7C, third row). A re-activation of chromatin regulators, except  
453 for *Chd7*, was observed in the NCCs. The expression of EMT/ ectomesenchyme genes such as  
454 *Twist1*, *Snai1*, *Snai2* and *Pdgfra* increased exponentially in established NCCs (Figure 7C,  
455 bottom row).

456 NCC and NSC marker genes responded inversely to the combined perturbation of *Twist1* and  
457 chromatin regulators. Compound loss-of-function (LOF) reduced expression of the NCC  
458 specifiers and unleashed the expression of NSC TFs in Day-12 NECs (Figure 7C, second and  
459 third row). In single-gene heterozygous cells, we observed only modest or no change in the  
460 gene expression. *Sox2*, a driver of the NSC lineage and a repressor of NCC formation  
461 (Mandalos *et al.*, 2014), was repressed concurrently with the increased expression of *Twist1*  
462 and the chromatin regulators during neurogenic differentiation and NCC specification (Figure  
463 7C). However, in the compound heterozygous cells, *Sox2* transcript and protein were both up-  
464 regulated compared to the wild-type cells, together with NSC markers TUBB3 and NES  
465 (Figure 7C-E). Finally, the EMT genes were only affected by the compound knockdown at the  
466 established NCC/ ectomesenchyme stage (Figure 7C, bottom row; see also Figure 6D, E).

467 We focused on effect of gene perturbation on the cell fate bias in late NECs by examining the  
468 expression of a broader panel of neural tube patterning genes (Briscoe *et al.*, 2000; Alaynick  
469 *et al.*, 2011; Kutejova *et al.*, 2016). The difference between WT and mutant cells in the dataset  
470 is primary driven by changes in NCC specifiers and NSC TFs. In the compound mutant NECs,  
471 in addition to NCC specifiers (*Tfap2a*, *Msx1*, *Msx2*, *Zic1*, *Id1* and *Id2*), expression of dorsal  
472 NSC markers were attenuated (*Gli3*, *Rgs2*, *Boc* and *Ptn*; Figure 7F, G). Meanwhile, the pan-  
473 and ventral-NSC markers *Sox2*, *Pax6*, *Olig2*, *Foxa2* and *Cited2* were ectopically induced  
474 (Figure 7F, G: genes in red). ChIP-seq data showed that TWIST1, CHD7 and CHD8 directly

475 bind to the promoters of most of these genes (Figure 4G, S5A, Table S4).

476 Collectively, the findings implicated that in the plastic NEC progenitor populations, TWIST1-  
477 chromatin regulators may help promoting the dorsal fate including the dorsal-most NCC  
478 propensity by counteracting SOX2 and other NSC TFs. Loss of function of the module leads  
479 to the diversion of NECs from the NCC fate to the neurogenic fate, which may contribute to  
480 the deficiency of NCCs and their derivatives observed in the mutant embryos (Figure 3).

## 481 ***Discussion***

### 482 **Proteomic screen and network-based inference of NCC epigenetic regulators**

483 Analysis of protein-protein interaction is a powerful approach to identify the connectivity and  
484 the functional hierarchy of different genetic determinants associated with an established  
485 phenotype (Song and Singh, 2009; Mitra *et al.*, 2013; Sahni *et al.*, 2015; Cowen *et al.*, 2017).  
486 We used TWIST1 as an anchor point and the BioID methodology to visualize the protein  
487 interactome necessary for NCCs development. Network propagation exploiting similarity  
488 network built on prior associations, enabled the extraction of clusters critical for neural crest  
489 function and pathology. Using this high throughput analytic pipeline, we were able to identify  
490 the core components of the TWIST1-CRM that guides NCC lineage development.

491 Among the interacting factors were members of the chromatin regulation cluster, which show  
492 dynamic component switching between cell types, and may confer tissue-specific activities.  
493 The architecture of the modular network reflects the biological organization of chromatin  
494 remodeling machinery, which comprises multi-functional subunits with conserved and cell-  
495 type-specific components (Meier and Brehm, 2014). Previous network studies reported that  
496 disease-causal proteins exist mostly at the center of large clusters and have a high degree of  
497 connectivity (Jonsson and Bates, 2006; Ideker and Sharan, 2008). We did not observe an  
498 overall correlation between disease probability and the degree of connectivity or centrality for  
499 factors in the TWIST1 interactome (Figure S2F). However, the topological characteristics of  
500 the chromatin regulatory cluster resembled the features of disease modules and enriched for  
501 craniofacial phenotypes. In contrast, the "ribosome biogenesis" module that was also densely  
502 inter-connected, was void of relevant phenotypic association (Figure 1C). Network  
503 propagation is, therefore, an efficient way to identify and prioritize important clusters while  
504 eliminating functionally irrelevant ones.

505 Based on these results, we selected core TWIST1-CRM epigenetic regulators CHD7, CHD8,  
506 and WHSC1, and demonstrated their physical and functional interaction with TWIST1. In the  
507 progenitors of the NCCs, these factors displayed overlapping genomic occupancy that  
508 correlated with the active chromatin marks in the fate specification genes in neuroepithelium.

### 509 **Attribute of TWIST1 interacting partners in NCC development**

510 Combinatorial perturbation of the disease “hot-spots” in TWIST1-CRM impacted adversely  
511 on NCC specification and craniofacial morphogenesis in mouse embryos, which phenocopy a  
512 spectrum of human congenital malformations associated with NCC deficiencies (Johnson *et al.*,  
513 1998; Chun *et al.*, 2002; Cai *et al.*, 2003; Bosman *et al.*, 2005; Bernier *et al.*, 2014; Schulz  
514 *et al.*, 2014; Battaglia *et al.*, 2015; Etchevers *et al.*, 2019). These observations revealed CHD8  
515 and WHSC1 as putative determinants for NCC development and neurocristopathies. While  
516 CHD8 is associated with autism spectrum disorder (Bernier *et al.*, 2014; Katayama *et al.*, 2016),  
517 its function for neural crest development has never been reported. Here, we demonstrated that  
518 the loss of *Chd8* affected NCC specification and trigeminal sensory nerve formation *in vivo*, in  
519 a *Twist1* dependent manner. We showed that TWIST1 occupancy is a requisite for CHD8  
520 recruitment to common target genes. CHD8 may subsequently initiate chromatin opening and  
521 recruit H3-lysine tri-methyltransferases (Zhao *et al.*, 2015) such as WHSC1 (Figure S6). We  
522 also showed that WHSC1 is required in combination with TWIST1 to promote NCC fate and  
523 tissue patterning. Unlike CHD8 and WHSC1, CHD7 has been previously implicated in  
524 neurocristopathy (CHARGE syndrome) and the motility of NCCs (Schulz *et al.*, 2014; Okuno  
525 *et al.*, 2017). Our study has corroborated these findings while also showing that CHD7 interacts  
526 with TWIST1 to promote NCC specification. In sum, we propose the TWIST1-CRM as a  
527 unifying model that connects previously unrelated regulatory factors in different rare diseases  
528 and predict their functional dependencies in NCC development (Figure S6). Other epigenetic  
529 regulators identified as part of the TWIST1-interactome, such as PBRM1, ZFP62 and MGA,  
530 are also part of this module and may act to further fine-tune its activity.

### 531 **The phasic activity of TWIST1 and chromatin regulators in the course of NCC** 532 **differentiation**

533 NCCs are derived from the neuroepithelium in a series of cell fate specification events  
534 (Soldatov *et al.*, 2019). TWIST1 and the chromatin regulators cooperatively drive the  
535 progression along the lineage trajectory at different phases of NCC differentiation. *Twist1* is



536 active at every step as its expression steadily increases during differentiation. The functional  
537 interaction with different components of the regulatory module may commence when the  
538 expression of *Chd7*, *Chd8* and *Whsc1* peaks early in the NECs. LOF of the module in NECs  
539 leads to enhanced NSC fate bias at the expense of the NCCs, suggesting that the early activation  
540 of *Twist1*, *Chd7*, *Chd8* and *Whsc1* predilect NCC propensity. In the established NCCs, re-  
541 activation of *Chd8* and *Whsc1* was associated with the expression of genes associated with  
542 NCC identity, EMT, and ectomesenchyme propensity. *Chd7* activity was not coupled with  
543 EMT in the NCCs, suggesting that its role may be different from the other two chromatin  
544 regulators at this stage. The switch of TWIST1 module activity was reflected by activation of  
545 different groups of target genes, suggesting that phase-specific deployment of the regulatory  
546 module is critical for navigating the cells along the lineage trajectory of NCC development.

#### 547 **The competition between TWIST1 module and SOX2 in fate decision**

548 The segregation of NCC and NSC lineages is the first event of NCC differentiation. Our results  
549 show that the lineage allocation may be accomplished by the mutual opposition between core  
550 members of the TWIST1-CRM and NSC TFs such as SOX2. *Sox2* expression is continuously  
551 repressed in the NCC lineage (Wakamatsu *et al.*, 2004; Cimadamore *et al.*, 2011; Soldatov *et*  
552 *al.*, 2019), likely through direct binding and inhibition by TWIST1-CHD8 at *Sox2* promotor.  
553 In *Twist1<sup>+/-</sup>;Chd8<sup>+/-</sup>* mutant embryos, the aberrant upregulation of *Sox2* correlated with  
554 deficiency of NCC derivatives and the expanded neuroepithelium of the embryonic brain. In a  
555 similar context, *Sox2* overexpression in chicken neuroepithelium blocks the production of  
556 TFAP2 $\alpha$ -positive NCC (resulting in the loss of cranial nerve ganglia), and circumvented the  
557 expression of EMT genes and NCC ventral migration (Wakamatsu *et al.*, 2004; Remboutsika  
558 *et al.*, 2011). On the contrary, conditional knockout of *Sox2* results in ectopic formation and  
559 migration of NCCs and thinning of the neuroepithelium (Mandalos *et al.*, 2014).

#### 560 **The TWIST1-chromatin regulator induces NCC specification concurrently with** 561 **dorsoventral polarization of the NSCs**

562 The partitioning of the neural tube into subdomains along the dorsoventral axis is accomplished  
563 by cross-repression of the domain-specific transcriptional activity (Briscoe *et al.*,  
564 2000; Kutejova *et al.*, 2016). Our findings suggest a secondary contribution of the TWIST1-  
565 chromatin regulators to this process. Our data suggest that when NCC and NSC fate programs  
566 are activated in the neural progenitors, TWIST1-chromatin regulators repress both pan- and

567 ventral-NSC TFs (*Sox2*, *Olig2*, *Foxa2*, *Pax6*) and their effectors while concurrently promoting  
568 the dorsal neuroepithelial fate necessary for priming the cells for NCC specification.  
569 Reciprocally, NSC transcription factors, including SOX2, PAX6, and OLIG2 (Hikichi *et al.*,  
570 2013; Mistri *et al.*, 2015; Kutejova *et al.*, 2016) may repress the TWIST1-chromatin regulators  
571 and compete with them at the promoters of NCC specifiers to enhance NSC fate (Figure S5B,  
572 Figure S6). Notably, SOX2 and PAX6 are expected to co-bind and activate genes promoting  
573 the ventral fate (Zhang *et al.*, 2019). These results indicate that the NCC lineage is established  
574 concurrently with neurogenic lineages and that it is abided by the same patterning rules. The  
575 TWIST1-CRM members may therefore also be part of the molecular machinery necessary for  
576 dorsoventral partitioning of the neuroepithelium (Briscoe *et al.*, 2000; Kutejova *et al.*, 2016).

577 In conclusion, by implementing an analytic pipeline to decipher the TWIST1 interactome, we  
578 have a glimpse of the global molecular hierarchy of NCC development. We have characterized  
579 the cooperative function of core components of TWIST1-CRM including the TWIST1 and  
580 chromatin regulators CHD7, CHD8 and WHSC1. We demonstrated that this module is a  
581 dynamic nexus to drive molecular mechanisms for orchestrating NCC lineage progression and  
582 repressing NSC fate, facilitating dorsoventral tissue patterning and enabling the acquisition of  
583 ectomesenchyme propensity. The TWIST1-chromatin regulators and the NSC regulators  
584 coordinate the cross-talk between the neural crest-derived tissues and the neural progenitors of  
585 the CNS, both of which are often affected concurrently in a range of human congenital diseases.

586

## 587 ***Materials and Methods***

### 588 **Cell culture and BioID Protein proximity-labeling**

589 O9-1 cells (passage 20- 22, Millipore cat. #SCC049) were maintained in O9-1 medium: high  
590 glucose DMEM (Gibco), 12.5 % (v/v) heat-inactivated FBS (Fisher Biotec), 10 mM  $\beta$ -  
591 mercaptoethanol, 1X non-essential amino acids (100X, Thermo Fisher Scientific), 1 % (v/v)  
592 nucleosides (100X, Merck) and 10 mil U/mL ESGRO® mouse leukaemia inhibitory factor  
593 (Merck) and 25 ng/mL FGF-2 (Millipore, Cat. #GF003). For each replicate experiment, 1.5  
594  $\times 10^6$  cells per flask were seeded onto 4\*T75 flasks 24 hrs before transfection. The next day  
595 *PcDNA 3.1/Twist1-BirA\*-HA* plasmid or *PcDNA 3.1/GFP-BirA\*-HA* plasmid was transfected  
596 into cells using Lipofectamine® 3000 (Life Technologies) according to the manufacturer's



597 instructions. Biotin (Thermo Scientific, cat. #B20656) was applied to the medium at 50 nM.  
598 Cells were harvested 16 hrs post-transfection, followed by snap-freeze liquid nitrogen storage  
599 or resuspension in lysis buffer. All steps were carried out at 4°C unless indicated otherwise.  
600 Cells were sonicated on the Bioruptor Plus (Diagenode), 30s on/off for five cycles at high  
601 power. An equal volume of cold 50 mM Tris-HCl, pH 7.4, was added to each tube, followed  
602 by two 30s on/off cycles of sonication. Lysates were centrifuged for 15 mins at 14000 rpm.  
603 Protein concentrations were determined by Direct Detect® Infrared Spectrometer (Merck).

604 Cleared lysate with equal protein concentration for each treatment was incubated with pre-  
605 blocked streptavidin Dynabeads® (MyOne Streptavidin C1, Invitrogen™, cat. #65002) for 4  
606 hrs. Beads were collected and washed sequentially in Wash Buffer 1-3 with 8 mins rotation  
607 each, followed by quick washes with cold 1 mL 50 mM Tris-HCl, pH 7.4, and 500 µL  
608 triethylammonium bicarbonate (75 mM). Beads were then collected by spinning (5 min at  
609 2,000 × g) and processed for mass spectrometry analysis.

610 Lysis Buffer: 500mM NaCl, 50 mM Tris-HCl, pH 7.5, 0.2% SDS 0.5% Triton.

611 Add 1x Complete protease inhibitor (Roche), 1 mM DTT fresh

612 Wash Buffer 1: 2 % SDS,

613 Wash Buffer 2: 0.1 % sodium deoxycholate, 1% Triton, 1mM EDTA, 1 mL, 500 mM NaCl,  
614 50 mM HEPES-KOH, pH 7.5

615 Wash Buffer 3: 0.1 % sodium deoxycholate, 0.5% NP40 (Igepal), 1 mM EDTA, 250 mM  
616 NaCl, 10 mM Tris-HCl, pH 7.5

## 617 **Liquid chromatography with tandem mass spectrometry**

618 Tryptic digestion of bead-bound protein was performed in 5% w/w trypsin (Promega, cat.  
619 #V5280), 50mM triethylammonium bicarbonate buffer at 37 °C overnight. The supernatant  
620 was collected and acidified with trifluoroacetic acid (TFA, final concentration 0.5% v/v).  
621 Proteolytic peptides were desalted using Oligo R3 reversed phase resin (Thermo Fisher  
622 Scientific) in stage tips made in-house (Rappsilber *et al.*, 2007). Peptides were fractioned by  
623 hydrophilic interaction liquid chromatography using an UltiMate 3000 HPLC (Thermo Fisher  
624 Scientific) and a TSKgel Amide-80 HILIC 1 mm × 250 mm column. Peptides were eluted in a  
625 gradient from 100% mobile phase B (90% acetonitrile, 0.1% TFA, 9.9% water) to 60% mobile  
626 phase A (0.1% TFA, 99.9% water) for 35 min at 50 µL/min and fractions collected in a 96-  
627 well plate, followed by vacuum centrifugation to dryness. Dried peptide pools were

628 reconstituted in 0.1% formic acid in the water, and 1/10th of samples were analyzed by LC-  
629 MS/MS.

630 Mass spectrometry was performed using an LTQ Velos-Orbitrap MS (Thermo Fisher Scientific)  
631 coupled with an UltiMate RSLCnano-LC system (Thermo Fisher Scientific). A volume of 5  
632  $\mu\text{L}$  was loaded onto a 5 mm C18 trap column (Acclaim PepMap 100, 5  $\mu\text{m}$  particles, 300  $\mu\text{m}$   
633 inside diameter, Thermo Fisher Scientific) at 20  $\mu\text{L}/\text{min}$  for 2.5 min in 99% phase A (0.1%  
634 formic acid in water) and 1% phase B (0.1% formic acid, 9.99% water and 90% acetonitrile).  
635 The peptides were eluted through a 75  $\mu\text{m}$  inside diameter column with integrated laser-pulled  
636 spray tip packed to a length of 20 cm with Reprosil 120 Pur-C18 AQ 3  $\mu\text{m}$  particles (Dr.  
637 Maisch). The gradient was from 7% phase B to 30% phase B in 46.5 min, to 45% phase B in  
638 5 min, and to 99% phase B in 2 min. The mass spectrometer was used to apply 2.3 kV to the  
639 spray tip via a pre-column liquid junction. During each cycle of data-dependent MS detection,  
640 the ten most intense ions within  $m/z$  300-1,500 above 5000 counts in a 120,000 resolution  
641 orbitrap MS scan were selected for fragmentation and detection in an ion trap MS/MS scan.  
642 Other MS settings were: MS target was 1,000,000 counts for a maximum of 500 ms; MS/MS  
643 target was 50,000 counts for a maximum of 300 ms; isolation width, 2.0 units; normalized  
644 collision energy, 35; activation time 10 ms; charge state 1 was rejected; mono-isotopic  
645 precursor selection was enabled; dynamic exclusion was for 10 s.

## 646 **Proteomic data analysis**

### 647 *Pre-processing of raw mass spectrometry data*

648 Raw MS data files were processed using Proteome Discoverer v.1.3 (Thermo Fisher Scientific).  
649 Processed files were searched against the UniProt mouse database (downloaded Nov 2016)  
650 using the Mascot search engine version 2.3.0. Searches were done with tryptic specificity  
651 allowing up to two missed cleavages and tolerance on mass measurement of 10 ppm in MS  
652 mode and 0.3 Da for MS/MS ions. Variable modifications allowed were acetyl (Protein N-  
653 terminus), oxidized methionine, glutamine to pyro-glutamic acid, and deamidation of  
654 asparagine and glutamine residues. Carbamidomethyl of cysteines was a fixed modification.  
655 Using a reversed decoy database, a false discovery rate (FDR) threshold of 1% was used. The  
656 lists of protein groups were filtered for first hits.

657 Processing and analysis of raw peptide-spectrum match (PSM) values were performed in R

658 following the published protocol (Waardenberg, 2017). Data were normalized by the sum of  
659 PSM for each sample (Figure S2B), based on the assumption that the same amount of starting  
660 materials was loaded onto the mass spectrometer for the test and control samples. A PSM value  
661 of 0 was assigned to missing values for peptide absent from the sample or below detection level  
662 (Sharma *et al.*, 2009). Data points filtered by the quality criterion that peptides had to be present  
663 in at least two replicate experiments with a PSM value above 2. The normalized and filtered  
664 dataset was fitted under the negative binomial generalized linear model and subjected to the  
665 likelihood ratio test for TWIST1 vs. control interactions, using the msmsTest and EdgeR  
666 packages (Gregori *et al.*, 2019) (Robinson *et al.*, 2010). Three biological replicates each from  
667 O9-1 and 3T3 cells were analyzed. One set of C3H10T1/2 cell line was analyzed. A sample  
668 dispersion estimate was applied to all datasets. Stringent TWIST1-specific interactions in the  
669 three cell lines were determined based on a threshold of multi-test adjusted p-values ( $\text{adjp}$ ) <  
670 0.05 and fold-change > 3.

#### 671 *Network propagation for functional identification and novel disease gene annotation*

672 Prior knowledge of mouse protein functional associations, weighted based on known protein-  
673 protein interaction (PPI), co-expression, evolutionary conservation, and text mining results,  
674 were retrieved by the Search Tool for the Retrieval of Interacting Genes (STRING) (Szklarczyk  
675 *et al.*, 2015). Intermediate confidence (combined score) of > 0.4 was used as the cut-off for  
676 interactions. The inferred network was imported into Cytoscape for visualization (Shannon *et al.*  
677 *et al.*, 2003). We used MCL algorithm (Enright *et al.*, 2002), which emulates random walks  
678 between TWIST1 interacting proteins to detect clusters in the network, using the STRING  
679 association matrix as the probability flow matrix. Gene Ontology and transcriptional binding  
680 site enrichment analysis for proteins were obtained from the ToppGene database (Chen *et al.*,  
681 2009), with a false-discovery rate < 0.05. The enriched functional term of known nodes was  
682 used to annotate network neighbors within the cluster with unclear roles.

683 Heat diffusion was performed on the network, using twenty-two genes associated with human  
684 and mouse facial malformation (HP:0001999, MP:0000428) as seeds. A diffusion score of 1  
685 was assigned to the seeds, and these scores were allowed to propagate to network neighbors,  
686 and heat stored in nodes after set time = 0.25 was calculated. NetworkAnalyzer (Assenov *et al.*  
687 *et al.*, 2008), which is a feature of Cytoscape, was used to calculate nodes' Degree (number of  
688 edges), Average Shortest Path (connecting nodes), and Closeness Centrality (a measure of how  
689 fast information spreads to other nodes).

## 690 **Co-immunoprecipitation**

### 691 *Protein Immunoprecipitation*

692 For the analysis of protein localization, transfection was performed using Lipofectamine®  
693 3000 (Life Tech) according to manufacturer instructions with the following combinations of  
694 plasmids: pCMV-*Twist1-FLAG* plus one of (*pCMV-gfp-HA*, *pCMV-Tcf3-HA*, *pCMV-Prrx1-*  
695 *HA*, *pCMV-Prrx2-HA*, *pCMV-Chd7-HA*, *pCMV-Chd8-HA*, *pCMV-Dvl1-HA*, *pCMV-Smarcel-*  
696 *HA*, *pCMV-Tfe3-HA*, *pCMV-Whsc1-HA*, *pCMV-Hmg20a-HA*). The cell pellet was lysed and  
697 centrifuged at 14,000 x g for 15 min. Cleared lysate was incubated with  $\alpha$ -TWIST1/  $\alpha$ -FLAG  
698 antibody (1  $\mu$ g/ mL) at 4°C for 2 hrs with rotation. Protein-G agarose beads (Roche) were then  
699 added, and the sample rotated for 30 min at RT °C. Beads were washed in ice-cold wash buffer  
700 six times and transferred to new before elution in 2x LDS loading buffer at 70°C for 10 mins.  
701 Half the eluate was loaded on SDS-PAGE with the “input” controls for western blot analysis.

### 702 *Western Blotting*

703 Protein was extracted using RIPA buffer lysis (1× PBS, 1.5% Triton X-100, 1% IGEPAL, 0.5%  
704 Sodium Deoxycholate, 0.1% SDS, 1 mM DTT, 1x Complete protease inhibitor [Roche]) for  
705 30 minutes at 4°C under rotation. The lysate was cleared by centrifugation at 15000 g, and  
706 protein concentration was determined using the Direct Detect spectrometer (Millipore). 20  $\mu$ g  
707 of protein per sample was denatured at 70°C for 10 mins in 1× SDS Loading Dye (100 mM  
708 Tris pH 6.8, 10% (w/v) SDS, 50% (w/v) Glycerol, 25%(v/v) 2-Mercaptoethanol, Bromophenol  
709 blue) and loaded on a NuPage 4-12% Bis-Tris Gel (Life Technologies, Cat. #NP0322BOX).  
710 Electrophoresis and membrane transfer was performed using the Novex™ (Invitrogen) system  
711 following manufacturer instructions.

712 Primary antibodies used were mouse monoclonal  $\alpha$ -TWIST1 (1:1000, Abcam, Cat. #ab50887),  
713 mouse monoclonal [29D1]  $\alpha$ -WHSC1/NSD2 (1:5000, Abcam, Cat. #ab75359), rabbit  
714 polyclonal  $\alpha$ -CHD7 (1:5000, Abcam, Cat. #ab117522), rabbit polyclonal  $\alpha$ -CHD8 (1:10000,  
715 Abcam, Cat. #ab114126), mouse  $\alpha$ - $\alpha$ -tubulin (1:1000, Sigma, Cat. #T6199), rabbit  $\alpha$ -HA  
716 (1:1000, Abcam, Cat. #ab9110) and mouse  $\alpha$ -FLAG M2 (Sigma, Cat. #F1804). Secondary  
717 antibodies used were HRP-conjugated donkey  $\alpha$ -Rabbit IgG (1:8000, Jackson  
718 Immunoresearch, Cat. #711-035-152) and HRP-conjugated donkey  $\alpha$ -Mouse IgG (1:8000,  
719 Jackson Immunoresearch, Cat. #711-035-150).

## 720 **GST Pull-down**

### 721 *Production and purification of recombinant proteins*

722 Prokaryotic expression plasmids pGEX2T with the following inserts GST-*Twist1*, GST-  
723 *N' Twist1*, GST-*C' Twist1*, GST-*Twist1bhlh*, GST-*Twist1TA*, or GST were transfected in BL21  
724 (DE3) *Escherichia coli* bacteria (Bioline). Bacterial starter culture was made by inoculation of  
725 4 mL Luria broth with 10 µg/mL ampicillin, and grown 37°C, 200 rpm overnight. Starter  
726 culture was used to inoculate 200 mL Luria broth media with 10 µg/mL ampicillin and grown  
727 at 37°C, 200 rpm until the optical density measured OD600 was around 0.5-1.0. The culture  
728 was cooled down to 25°C for 30 min before Isopropyl β-D-1-thiogalactopyranoside (IPTG)  
729 was added to the media at a final concentration of 1 mM. Bacteria were collected by  
730 centrifugation 4 hrs later at 8000 rpm for 10 mins at 4°C.

731 Bacteria were resuspended in 5 % volume of lysis buffer (10 mM Tris-Cl, pH 8.0; 300 mM  
732 NaCl; 1 mM EDTA, 300 mM NaCl, 10 mM Tris.HCl [pH 8.0], 1 mM EDTA, 1x Complete  
733 protease inhibitor [Roche], 1 mM PMSF, 100ng/mL leupeptin, 5mM DTT) and nucleus were  
734 released by 3 rounds of freeze/ thaw cycles between liquid nitrogen and cold water. The sample  
735 was sonicated for 15 s x 2 (consistent; intensity 2), with 3 min rest on ice between cycles.  
736 Triton X-100 was added to a final concentration of 1%. The lysate was rotated for 30 min at  
737 4°C and centrifuged at 14000 rpm for 15 min at 4°C.

738 The supernatant was collected and rotated with 800 µL of 50% Glutathione Sepharose 4B  
739 slurry (GE, cat. # 17-0756-01) for 1 h, at 4°C. Beads were then loaded on MicroSpin columns  
740 (GE cat. #27-3565-01). Column was washed three times with wash buffer (PBS 2X, Triton X-  
741 100 0.1%, imidazole 50 mM, NaCl 500 mM, DTT 1 mM, 1x Complete protease inhibitor  
742 [Roche]) before storage in 50% glycerol (0.01 % Triton). Quantity and purity of the  
743 recombinant protein on beads were assessed by SDS polyacrylamide gel electrophoresis (SDS-  
744 PAGE, NuPAGE 4-12 % bisacrylamide gel, Novex) followed by Coomassie staining or  
745 western blot analysis with anti-TWIST1 (1:1000), anti-GST (1:1000) antibody. Aliquots were  
746 kept at -20°C for up to 6 months.

### 747 *GST pulldown*

748 Cell pellet ( $5 \times 10^6$ ) expressing HA-tagged TWIST1 interaction candidates were thawed in 300  
749 µL hypotonic lysis buffer (HEPES 20 mM, MgCl<sub>2</sub> 1 mM, Glycerol 10%, Triton 0.5 %. DTT 1

750 mM, 1x Complete protease inhibitor [Roche], Benzo nuclease 0.5  $\mu$ l/ ml) and incubated at  
751 room temperature for 15 mins (for nuclease activity). An equal volume of hypertonic lysis  
752 buffer (HEPES 20 mM, NaCl<sub>2</sub> 500 mM, MgCl<sub>2</sub> 1 mM, Glycerol 10%, DTT 1 mM, 1x  
753 Complete protease inhibitor [Roche]) was then added to the lysate. Cells are further broken  
754 down by passaging through gauge 25 needles for 10 strokes and rotated at 4°C for 30 min.  
755 After centrifugation at 12,000 x g, 10 min, 200  $\mu$ L lysate was incubated with 10  $\mu$ L bead slurry  
756 (or the same amount of GST fusion protein for each construct decided by above Coomassie  
757 staining). Bait protein capture was done at 4°C for 4 hrs with rotation.

758 Beads were collected by spin at 2 min at 800  $\times$  g, 4°C, and most of the supernatant was carefully  
759 removed without disturbing the bead bed. Beads were resuspended in 250  $\mu$ L ice-cold wash  
760 buffer, rotated for 10 mins at 4°C and transferred to MicroSpin columns that were equilibrated  
761 with wash buffer beforehand. Wash buffer was removed from the column by spin 30 sec at 100  
762  $\times$  g, 4°C. Beads were washed for 4 more times quickly with ice-cold wash buffer before eluting  
763 proteins in 2X LDS loading buffer 30  $\mu$ L at 70°C, 10 min, and characterized by western blotting.

#### 764 **Generation of mutant ESC by CRISPR-Cas9 editing**

765 CRISPR-Cas9-edited mESCs were generated as described previously (Sibbritt *et al.*, 2019).  
766 Briefly, 1-2 gRNAs for target genes were ligated into pSpCas9(BB)-2A-GFP (PX458, addgene  
767 plasmid #48138, *a gift from Feng Zhang*). Three  $\mu$ g of pX458 containing the gRNA was  
768 electroporated into 1x10<sup>6</sup> A2loxCre ESCs or A2loxCre Twist1<sup>+/-</sup> cells (clone T2-3, generated  
769 by the Vector & Genome Engineering Facility at the Children's Medical Research Institute)  
770 using the Neon® Transfection System (Thermo Fisher Scientific). Electroporated cells were  
771 plated as single cells onto pre-seeded lawns of mouse embryonic fibroblasts (MEF), and GFP  
772 expressing clones grown from single cells were selected under the fluorescent microscope. In  
773 total, 30- 40 clones were picked for each electroporation. For mutant ESC genotyping, clones  
774 were expanded and grown on a gelatin-coated plate for three passages, to remove residue MEFs  
775 contamination.

776 For genotyping, genomic lysate of ESCs was used as input for PCR reaction that amplified  
777 region surrounding the mutation site (+/- 200-500 bp flanking each side of the mutation). The  
778 PCR product was gel purified and sub-cloned into the pGEM®-T Easy Vector System  
779 (Promega) as per manufacturer's protocol. At least ten plasmids from each cell line were  
780 sequenced to ascertain monoallelic frameshift mutation and exclude biallelic mutations.



## 781 **Generation of mouse chimeras from ESCs**

782 *ARC/s* and *DsRed.T3* mice were purchased from the Australian Animal Resources Centre and  
783 maintained as homozygous breeding pairs. ESC clones with monoallelic frameshift mutations  
784 and the parental *A2LoxCre* ESC line were used to generate chimeras. Embryo injections were  
785 performed as previously described (Sibbritt *et al.*, 2019). Briefly, 8-10 ESCs were injected per  
786 eight-cell *DsRed.T3* embryo (harvested at 2.5 dpc from super-ovulated *ARC/s* females crossed  
787 to *DsRed.T3* stud males) and incubated overnight. Ten to twelve injected blastocysts were  
788 transferred to each E2.5 pseudo-pregnant *ARC/s* female recipient. E9.5 and E11.5 embryos  
789 were collected 6 and 8 days after transfer to pseudo-pregnant mice. Embryos showing red  
790 fluorescent signal indicating no or low ESC contribution were excluded from the phenotypic  
791 analysis. Animal experimentations were performed in compliance with animal ethics and  
792 welfare guidelines stipulated by the Children's Medical Research Institute/Children's Hospital  
793 at Westmead Animal Ethics Committee.

## 794 **Whole-mount fluorescent immunostaining of mouse embryos**

795 Whole-mount fluorescent immunostaining of mouse embryos was performed by following the  
796 procedure of (Adameyko *et al.*, 2012) with minor modifications. Embryos were fixed for 6  
797 hours in 4% paraformaldehyde (PFA) and dehydrated through a methanol gradient (25%, 50%,  
798 75%, 100%). After 24 hours of incubation in 100% methanol at 4°C, embryos were transferred  
799 into bleaching solution (1 part of 30% hydrogen peroxide to 2 parts of 100% methanol) for  
800 another 24 hours (4°C). Embryos were then washed with 100% methanol (10 minutes x3 at  
801 room temperature), post-fixed with Dent's Fixative (dimethyl sulfoxide: methanol = 1:4)  
802 overnight at 4°C.

803 Embryos were blocked for 1 hour on ice in blocking solution (0.2 % BSA, 20% DMSO in PBS)  
804 with 0.4% Triton. Primary antibodies mouse 2H3 (for neurofilament 1:1000) and rabbit  $\alpha$ -  
805 TFAP2A (1:1000) or were diluted in blocking solution and incubated for four days at room  
806 temperature, and secondary antibodies (Goat  $\alpha$ -Rabbit Alexa Fluor 633; Goat  $\alpha$ -Mouse Alexa  
807 Fluor 488 and DAPI, Thermo Fisher Scientific) were incubated overnight in blocking solution  
808 at room temperature. Additional information of the antibodies used are listed in Table S6.  
809 Embryos were cleared using BABB (1part benzyl alcohol: 2 parts benzyl benzoate), after  
810 dehydration in methanol, and imaged using a Carl Zeiss Cell Observer SD spinning disc  
811 microscope. Confocal stacks through the embryo were acquired and then collapsed. Confocal



812 stacks were produced containing ~150 optical slices. Bitplane IMARIS software was used for  
813 3D visualization and analysis of confocal stacks. Optical sections of the 3D embryo were  
814 recorded using ortho/oblique functions in IMARIS software. The surface rendering wizard tool  
815 was used to quantify SOX2 expression in the ventricular zone by measuring the  
816 immunofluorescence intensity on three separate z-plane sections per volume of the region of  
817 each embryo. The data were presented graphically as the ratio of intensity/ volume.

### 818 **Generation of TWIST1 inducible expression ESC line**

819 ESC lines generated are listed in Table S6. A2loxCre Mouse ESCs (Mazzoni *et al.*, 2011) was  
820 a gift from Kyba Lab (Lillehei Heart Institute, Minnesota, USA). A2loxCre with Twist1 bi-  
821 allelic knockout background was generated by CRISPR-Cas9, as described below. The  
822 inducible *Twist1* ESC line was generated using the inducible cassette exchange method  
823 described previously (Iacovino *et al.*, 2014). The TWIST1 coding sequence was then cloned  
824 from the mouse embryo cDNA library into the p2lox plasmid downstream of the Flag tag  
825 (Iacovino *et al.*, 2014). The plasmid was transfected into A2loxCre (*Twist1*<sup>-/-</sup>) treated with 1  
826 µg/mL doxycycline for 24 hrs. The selection was performed in 300 µg/mL of G418 (Gibco)  
827 antibiotic for one week. Colonies were then picked and tested for TWIST1 expression  
828 following doxycycline treatment.

### 829 **NEC differentiation of the ESCs**

830 ESC lines generated in this study were differentiated into neural epithelial cells (NECs)  
831 following established protocols (Bajpai *et al.*, 2010; Varshney *et al.*, 2017) with minor  
832 modifications. ESCs were expanded in 2i/LIF media (Ying *et al.*, 2008) for 2-3 passages.  
833 Neurogenic differentiation was initiated by plating ESC in AggreWells (1x 10<sup>6</sup> per well) using  
834 feeder independent mESC. Colonies were then lifted from AggreWells and grown in  
835 suspension in Neurogenic Differentiation Media supplemented with 15% FBS with gentle  
836 shaking for 3 days. Cell colonies were transferred to gelatin-coated tissue culture plates and  
837 cultured for 24 h at 37 °C under 5% CO<sub>2</sub>.

838 Cells were selected in insulin-transferrin-selenium (ITS)-Fibronectin media for 6-8 days at  
839 37 °C and 5% CO<sub>2</sub>, with a change of media every other day. Accutase™ (Stemcell  
840 Technologies) was used to dissociate cells from the plate, allowing the removal of cell clumps.  
841 NECs were collected by centrifugation and plated on Poly-L-ornithine (50 µg/mL, Sigma-

842 Aldrich) and Laminin (1  $\mu\text{g}/\text{mL}$ , Novus Biological) coated dishes. For expansion of the cell  
843 line, cells were cultured in Neural Expansion Media (1.5  $\text{mg}/\text{mL}$  Glucose, 73  $\mu\text{g}/\text{mL}$  L-  
844 glutamine, 1x N2 media supplement [R & D systems] in Knockout DMEM/F12 [Invitrogen],  
845 10  $\text{ng}/\text{mL}$  FGF-2 and 1  $\mu\text{g}/\text{mL}$  Laminin [Novus Biologicals]). During this period, cells were  
846 lifted using Accutase<sup>TM</sup> and cell rosette clusters were let settle and were removed for two  
847 passages to enrich for pre-EMT NCC populations.

## 848 **Chromatin immunoprecipitation Sequencing (ChIP-seq)**

849 ESC with genotype *Twist1*<sup>-/-</sup>; *Flag-Twist1* O/E and *Twist1*<sup>-/-</sup> were differentiated into NEC for  
850 3 days following established protocol (Varshney *et al.*, 2017) and were collected in ice-cold  
851 DPBS. Following a cell count, approximately  $2 \times 10^7$  cells were allocated per cell line per ChIP.  
852 ChIP-seq assays were performed as previously described (Bildsoe *et al.*, 2016). In brief,  
853 chromatin was crosslinked and sonicated on the Bioruptor Plus (Diagenode) using the  
854 following program: 30 seconds on/off for 40 minutes on High power. The supernatant was  
855 incubated with  $\alpha$ -TWIST1 (Abcam, at. #ab50887) antibody conjugated Dynabeads overnight  
856 at 4 °C. The protein-chromatin crosslinking is reversed by incubation at 65 °C for 6 h. The  
857 DNA is purified using RNase A and proteinase K treatments, extracted using phenol-  
858 chloroform-isoamyl alcohol (25:24:1, v/v) and precipitated using glycogen and sodium acetate.  
859 The precipitated or input chromatin DNA was purified and converted to barcoded libraries  
860 using the TruSeq ChIP Sample Prep Kit (Illumina). Then 101 bp paired-end sequencing was  
861 performed on the HiSeq 4000 (Illumina).

## 862 **ChIP-sequencing data analysis**

863 ChIP-seq quality control results and analysis can be found in Figure S4. Adaptors from raw  
864 sequencing data were removed using Trimmomatic (Bolger *et al.*, 2014) and aligned to the  
865 *mm10* mouse genome (GENCODE GRCm38.p5; (Frankish *et al.*, 2019) using BWA aligner  
866 (Li and Durbin, 2009), and duplicates/unpaired sequences were removed using the picardtools  
867 (<http://broadinstitute.github.io/picard/>). MACS2 package (Zhang *et al.*, 2008) was used for  
868 ChIP-seq peak calling for both *Twist1*<sup>-/-</sup>; *Flag-Twist1* O/E and *Twist1*<sup>-/-</sup> IP samples against  
869 genomic input. IDR analysis was performed using the P-value as the ranking measure, with an  
870 IDR cut-off of 0.05. Peak coordinates from the two replicates were merged, using the most  
871 extreme start and end positions. The raw and processed data were deposited into the NCBI  
872 GEO database and can be accessed with the accession number GSE130251.

## 873 **ChIP-seq integrative analysis**

874 Public ChIP-seq datasets for CHD7, CHD8 and histone modifications in NECs were selected  
875 based on the quality analysis from the Cistrome Data Browser (<http://cistrome.org/db/#/>) and  
876 ENCODE guideline (Encode, 2012; Mei *et al.*, 2017). Datasets imported for analysis are listed  
877 in Table S6. To facilitate comparison with datasets generated from human samples, TWIST1  
878 ChIP sequences were aligned to the hg38 human genome by BWA. ChIP peak coordinates  
879 from this study were statistically compared using fisher's exact test (cut-off: P-value < 0.05,  
880 odds ratio >10) and visualized using Jaccard similarity score. Analysis were performed with  
881 BEDTools (Quinlan and Hall, 2010). ChIP-seq peaks for TWIST1, CHD7 and CHD8 were  
882 extended to uniform 1 kb regions, and regions bound by single factors or co-occupied by 2 or  
883 3 factors were identified. The Genomic Regions Enrichment of Annotations Tool (GREAT)  
884 was used to assign biological functions to genomic regions by analyzing the annotations of  
885 the nearby genes (Mclean *et al.*, 2010). Significance by both binomial and hypergeometric test  
886 (P<0.05) were used as cut-off. Genes with TSS +/- 5 kb of the peaks were annotated using  
887 ChIPpeakAnno package in R. List of target genes was compared between each CHD7, CHD8,  
888 and TWIST1. Bam files for each experiment were converted to bigwig files for ChIP-seq  
889 density profile, chromosome footprint, and IGV track visual analysis.

## 890 **O9-1 siRNA treatment and scratch assay**

891 Scratch Assays were performed on O9-1 cells following transient siRNA lipofectamine  
892 transfections. O9-1 cells were seeded at a density of  $0.5 \times 10^5$  cells per well on Matrigel-coated  
893 24-well plates on the day of transfection. 20 pmol of siRNA for candidate gene (*Chd7*, *Chd8*  
894 or *Whsc1*) and 20 pmol siRNA for *Twist1* or control was applied per well (24-well-plate), plus  
895 3  $\mu$ L lipofectamine RNAiMAX reagent (Thermo Fisher Scientific, cat. #13778075), following  
896 manufacturer protocol. Knockdown efficiency was assessed by qRT-PCR (Figure S5).

897 48 hours after transfection, a scratch was made in the confluent cell monolayer. Live images  
898 were taken with the Cell Observer Widefield microscope (ZEISS international) under standard  
899 cell culture conditions (37°C, 5% CO<sub>2</sub>). Bright-field images were captured at set tile regions  
900 every 15 mins over a 10 hrs period. The total migration area from the start of imaging to when  
901 the first cell line closed the gap was quantified by Fiji software (Schindelin *et al.*, 2012).

## 902 **cDNA synthesis, pre-amplification, and Fluidigm high-throughput RT-qPCR analysis**

903 cDNA synthesis, from 1 µg total RNA from each sample, was performed using the RT2  
904 Microfluidics qPCR Reagent System (Qiagen, Cat. # 330431). cDNAs were pre-amplified  
905 using the primer Mix for reporter gene sets (Table S5). High-throughput gene expression  
906 analysis (BioMark™ HD System, Fluidigm) was then performed using the above primer set.

907 Raw data were extracted using the Fluidigm Real-Time PCR Analysis Software, and  
908 subsequent analysis was performed in R-studio. Ct values flagged as undetermined or higher  
909 than the threshold ( $Ct > 24$ ) were assigned as missing values. Samples with a measurement for  
910 only one housekeeping gene or samples with measurements for  $< 30$  genes were excluded from  
911 further analysis. Genes missing values for more than 30 samples were also excluded from  
912 further analysis. Data were normalized using expressions of the average of 3 housekeeping  
913 genes (*Gapdh*, *Tbp*, *Actb*). Regularized-log transformation of the count matrix was then  
914 performed, and the PCA loading gene was generated using functions in the DEseq2 package.  
915 Differential gene expression analysis was performed using one-way ANOVA.

## 916 *Acknowledgment*

917 Our work was supported by the National Health and Medical Research Council (NHMRC) of  
918 Australia (Grant ID 1066832), the Australian Research Council (Grant DP 1094008) and Mr.  
919 James Fairfax (Bridgestar Pty Ltd). Imaging analysis was performed at the ACRF Telomere  
920 Analysis Centre and proteomics analysis was performed at the Biomedical Proteomics Facility,  
921 both supported by the Australian Cancer Research Foundation. XCF was supported by the  
922 University of Sydney International Postgraduate Research Scholarship, the Australian  
923 Postgraduate Award and the CMRI Scholarship; KEK was supported by The Danish Council  
924 for Independent Research and FP7 Marie Curie Actions – COFUND (DFE – 1325-00154) and  
925 the Carlsberg Foundation (CF15-1056 and CF16-0066); PO is the CMRI Norman Gregg  
926 Research Fellow; MEG was supported by NHMRC (grant ID 1079160); NF was supported by  
927 a University of Sydney Post-Doctoral Fellowship and the CMRI Norman Gregg Research  
928 Fellowship and PPLT is an NHMRC Senior Principal Research Fellow (Grant ID 1003100,  
929 1110751).

## 930 *Author contribution*

931 X.F., N.F. and P.P.L.T. designed the project; X.F., P.M., and J.Q.J.S. conducted the  
932 experiments; M.G. K.E.K. provided technical assistance with proteomics experiment and  
933 analysis, P.O. and J.S. assisted the transcriptome and imaging experiment; X.F. performed the

934 bioinformatics analysis; X.F., N.F. and P.P.L.T. wrote the manuscript. All authors edited the  
935 manuscript.

936

## 937 *References*

- 938 Adameyko, I., Lallemand, F., Furlan, A., Zinin, N., Aranda, S., Kitambi, S. S., Blanchart, A.,  
939 Favaro, R., Nicolis, S., Lübke, M., Müller, T., Birchmeier, C., Suter, U., Zaitoun, I.,  
940 Takahashi, Y. & Ernfors, P. 2012. Sox2 and Mitf cross-regulatory interactions  
941 consolidate progenitor and melanocyte lineages in the cranial neural crest.  
942 *Development (Cambridge, England)*, 139, 397-410.
- 943 Alaynick, W. A., Jessell, T. M. & Pfaff, S. L. 2011. SnapShot: spinal cord development. *Cell*, 146,  
944 178-1780.
- 945 Alonso-Lopez, D., Campos-Laborie, F. J., Gutierrez, M. A., Lambourne, L., Calderwood, M. A.,  
946 Vidal, M. & De Las Rivas, J. 2019. APID database: redefining protein-protein interaction  
947 experimental evidences and binary interactomes. *Database (Oxford)*, 2019.
- 948 Assenov, Y., Ramírez, F., Schelhorn, S.-E. E., Lengauer, T. & Albrecht, M. 2008. Computing  
949 topological parameters of biological networks. *Bioinformatics (Oxford, England)*, 24,  
950 282-284.
- 951 Bajpai, R., Chen, D. A., Rada-Iglesias, A., Zhang, J., Xiong, Y., Helms, J., Chang, C.-P. P., Zhao,  
952 Y., Swigut, T. & Wysocka, J. 2010. CHD7 cooperates with PBAF to control multipotent  
953 neural crest formation. *Nature*, 463, 958-962.
- 954 Baker, C. V., Bronner-Fraser, M., Le Douarin, N. M. & Teillet, M. A. 1997. Early- and late-  
955 migrating cranial neural crest cell populations have equivalent developmental  
956 potential in vivo. *Development (Cambridge, England)*, 124, 3077-3087.
- 957 Batsukh, T., Pieper, L., Koszucka, A. M., Von Velsen, N., Hoyer-Fender, S., Elbracht, M.,  
958 Bergman, J., Hoefsloot, L. H. & Pauli, S. 2010. CHD8 interacts with CHD7, a protein  
959 which is mutated in CHARGE syndrome. *Human Molecular Genetics*, 19, 2858-2866.
- 960 Battaglia, A., Carey, J. C. & South, S. T. 2015. Wolf-Hirschhorn syndrome: A review and update.  
961 *American journal of medical genetics. Part C, Seminars in medical genetics*, 169, 216-  
962 223.
- 963 Bernier, R., Golzio, C., Xiong, B., Stessman, H. A., Coe, B. P., Penn, O., Witherspoon, K., Gerds,  
964 J., Baker, C. & Silfhout, A. T. 2014. Disruptive CHD8 mutations define a subtype of  
965 autism early in development. *Cell*, 158, 263-276.
- 966 Bialek, P., Kern, B., Yang, X., Schrock, M., Sosic, D., Hong, N., Wu, H., Yu, K., Ornitz, D. M.,  
967 Olson, E. N., Justice, M. J. & Karsenty, G. 2004. A twist code determines the onset of  
968 osteoblast differentiation. *Developmental cell*, 6, 423-435.
- 969 Bildsoe, H., Loebel, D., Jones, V. J., Chen, Y.-T., Behringer, R. R. & Tam, P. 2009. Requirement  
970 for Twist1 in frontonasal and skull vault development in the mouse embryo.  
971 *Developmental Biology*, 331, 176-188.
- 972 Bildsoe, H., Fan, X., Wilkie, E. E., Ashoti, A., Jones, V. J., Power, M., Qin, J., Wang, J., Tam, P. P.  
973 L. & Loebel, D. a. F. 2016. Transcriptional targets of TWIST1 in the cranial mesoderm  
974 regulate cell-matrix interactions and mesenchyme maintenance. *Developmental  
975 biology*, 418, 189-203.
- 976 Blentic, A., Tandon, P., Payton, S., Walshe, J., Carney, T., Kelsh, R. N., Mason, I. & Graham, A.  
977 2008. The emergence of ectomesenchyme. *Developmental dynamics : an official*



- 978 *publication of the American Association of Anatomists*, 237, 592-601.
- 979 Bolger, A. M., Lohse, M. & Usadel, B. 2014. Trimmomatic: a flexible trimmer for Illumina  
980 sequence data. *Bioinformatics (Oxford, England)*, 30, 2114-2120.
- 981 Bosman, E. A., Penn, A. C., Ambrose, J. C., Kettleborough, R., Stemple, D. L. & Steel, K. P. 2005.  
982 Multiple mutations in mouse *Chd7* provide models for CHARGE syndrome. *Human*  
983 *Molecular Genetics*, 14, 3463-3476.
- 984 Brewer, S., Feng, W., Huang, J., Sullivan, S. & Williams, T. 2004. Wnt1-Cre-mediated deletion  
985 of AP-2 $\alpha$  causes multiple neural crest-related defects. *Developmental Biology*, 267,  
986 135-152.
- 987 Briscoe, J., Pierani, A., Jessell, T. M. & Ericson, J. 2000. A homeodomain protein code specifies  
988 progenitor cell identity and neuronal fate in the ventral neural tube. *Cell*, 101, 435-  
989 445.
- 990 Cai, J., Shoo, Sorauf, T. & Jabs, W. E. 2003. A novel mutation in the TWIST gene, implicated in  
991 Saethre-Chotzen syndrome, is found in the original case of Robinow-Sorauf  
992 syndrome. *Clinical genetics*, 64, 79-82.
- 993 Chen, J., Bardes, E. E., Aronow, B. J. & Jegga, A. G. 2009. ToppGene Suite for gene list  
994 enrichment analysis and candidate gene prioritization. *Nucleic acids research*, 37, 11.
- 995 Chun, K., Teebi, A. S., Jung, J. H., Kennedy, S., Laframboise, R., Meschino, W. S., Nakabayashi,  
996 K., Scherer, S. W., Ray, P. N. & Teshima, I. 2002. Genetic analysis of patients with the  
997 Saethre-Chotzen phenotype. *American journal of medical genetics*, 110, 136-143.
- 998 Cimadamore, F., Fishwick, K., Giusto, E., Gnedeva, K., Cattarossi, G., Miller, A., Pluchino, S.,  
999 Brill, L. M., Bronner-Fraser, M. & Terskikh, A. V. 2011. Human ESC-derived neural crest  
1000 model reveals a key role for SOX2 in sensory neurogenesis. *Cell stem cell*, 8, 538-551.
- 1001 Connerney, J., Andreeva, V., Leshem, Y., Muentener, C., Mercado, M. A. & Spicer, D. B. 2006.  
1002 Twist1 dimer selection regulates cranial suture patterning and fusion. *Developmental*  
1003 *dynamics : an official publication of the American Association of Anatomists*, 235,  
1004 1345-1357.
- 1005 Cowen, L., Ideker, T., Raphael, B. J. & Sharan, R. 2017. Network propagation: a universal  
1006 amplifier of genetic associations. *Nature Reviews Genetics*, 18.
- 1007 Encode 2012. An integrated encyclopedia of DNA elements in the human genome. *Nature*,  
1008 489, 57-74.
- 1009 Enright, A. J., Van Dongen, S. & Ouzounis, C. A. 2002. An efficient algorithm for large-scale  
1010 detection of protein families. *Nucleic acids research*, 30, 1575-1584.
- 1011 Ernst, J., Kheradpour, P., Mikkelson, T. S., Shores, N., Ward, L. D., Epstein, C. B., Zhang, X.,  
1012 Wang, L., Issner, R., Coyne, M., Ku, M., Durham, T., Kellis, M. & Bernstein, B. E. 2011.  
1013 Mapping and analysis of chromatin state dynamics in nine human cell types. *Nature*,  
1014 473, 43-49.
- 1015 Etchevers, H. C., Dupin, E. & Douarin, N. M. 2019. The diverse neural crest: from embryology  
1016 to human pathology. *Development*, 146.
- 1017 Fan, X., Loebel, D. a. F., Bildsoe, H., Wilkie, E. E., Tam, P. P. L., Qin, J. & Wang, J. 2016. Tissue  
1018 interactions, cell signaling and transcriptional control in the cranial mesoderm during  
1019 craniofacial development. *AIMS Genetics*, 3, 74-98.
- 1020 Fan, X., Waardenberg, A. J., Demuth, M., Osteil, P., Sun, J., Loebel, D. a. F., Graham, M., Tam,  
1021 P. P. L. & Fossat, N. 2020. TWIST1 homodimers and heterodimers orchestrate lineage-  
1022 specific differentiation. *Mol Cell Biol*.
- 1023 Firulli, B. A., Krawchuk, D., Centonze, V. E., Vargesson, N., Virshup, D. M., Conway, S. J.,  
1024 Cserjesi, P., Laufer, E. & Firulli, A. B. 2005. Altered Twist1 and Hand2 dimerization is



- 1025 associated with Saethre-Chotzen syndrome and limb abnormalities. *Nature Genetics*,  
1026 37.
- 1027 Frankish, A., Diekhans, M., Ferreira, A.-M. M., Johnson, R., Jungreis, I., Loveland, J., Mudge, J.  
1028 M., Sisu, C., Wright, J., Armstrong, J., Barnes, I., Berry, A., Bignell, A., Carbonell Sala, S.,  
1029 Chrast, J., Cunningham, F., Di Domenico, T., Donaldson, S., Fiddes, I. T., García Girón,  
1030 C., Gonzalez, J. M., Grego, T., Hardy, M., Hourlier, T., Hunt, T., Izuogu, O. G., Lagarde,  
1031 J., Martin, F. J., Martínez, L., Mohanan, S., Muir, P., Navarro, F. C. P. C. P., Parker, A.,  
1032 Pei, B., Pozo, F., Ruffier, M., Schmitt, B. M., Stapleton, E., Suner, M.-M. M., Sycheva, I.,  
1033 Uszczyńska-Ratajczak, B., Xu, J., Yates, A., Zerbino, D., Zhang, Y., Aken, B., Choudhary,  
1034 J. S., Gerstein, M., Guigó, R., Hubbard, T. J. P. J. P., Kellis, M., Paten, B., Reymond, A.,  
1035 Tress, M. L. & Flicek, P. 2019. GENCODE reference annotation for the human and  
1036 mouse genomes. *Nucleic acids research*, 47.
- 1037 Ghirlando, R. & Felsenfeld, G. 2016. CTCF: making the right connections. *Genes &*  
1038 *development*, 30, 881-891.
- 1039 Ghouzzi, V., Legeai-Mallet, L., Aresta, S., Benoist, C., Munnich, A., De Gunzburg, J. &  
1040 Bonaventure, J. 2000. Saethre-Chotzen mutations cause TWIST protein degradation  
1041 or impaired nuclear location. *Human Molecular Genetics*, 9, 813-819.
- 1042 Gregori, J., Sanchez, A. & Villanueva, J. 2019. msmsTests: LC-MS/MS Differential Expression  
1043 Tests. *R package*.
- 1044 Groves, A. K. & Labonne, C. 2014. Setting appropriate boundaries: fate, patterning and  
1045 competence at the neural plate border. *Developmental biology*, 389, 2-12.
- 1046 Gu, S., Boyer, T. G. & Naski, M. C. 2012. Basic helix-loop-helix transcription factor Twist1  
1047 inhibits transactivator function of master chondrogenic regulator Sox9. *Basic helix-*  
1048 *loop-helix transcription factor Twist1 inhibits transactivator function of master*  
1049 *chondrogenic regulator Sox9*.
- 1050 Hamamori, Y., Wu, H. Y., Sartorelli, V. & Kedes, L. 1997. The basic domain of myogenic basic  
1051 helix-loop-helix (bHLH) proteins is the novel target for direct inhibition by another  
1052 bHLH protein, Twist. *Molecular and cellular biology*, 17, 6563-6573.
- 1053 Hamamori, Y., Sartorelli, V., Ogryzko, V., Puri, P. L., Wu, H. Y., Wang, J. Y., Nakatani, Y. & Kedes,  
1054 L. 1999. Regulation of histone acetyltransferases p300 and PCAF by the bHLH protein  
1055 twist and adenoviral oncoprotein E1A. *Cell*, 96, 405-413.
- 1056 Hikichi, T., Matoba, R., Ikeda, T., Watanabe, A., Yamamoto, T., Yoshitake, S., Tamura-Nakano,  
1057 M., Kimura, T., Kamon, M., Shimura, M., Kawakami, K., Okuda, A., Okochi, H., Inoue,  
1058 T., Suzuki, A. & Masui, S. 2013. Transcription factors interfering with dedifferentiation  
1059 induce cell type-specific transcriptional profiles. *Proc Natl Acad Sci U S A*, 110, 6412-7.
- 1060 Iacovino, M., Roth, M. E. & Kyba, M. 2014. Rapid genetic modification of mouse embryonic  
1061 stem cells by Inducible Cassette Exchange recombination. *Methods in molecular*  
1062 *biology (Clifton, N.J.)*, 1101, 339-351.
- 1063 Ideker, T. & Sharan, R. 2008. Protein networks in disease. *Genome Research*, 18, 644-652.
- 1064 Ishii, M., Arias, A. C., Liu, L., Chen, Y.-B. B., Bronner, M. E. & Maxson, R. E. 2012. A stable cranial  
1065 neural crest cell line from mouse. *Stem cells and development*, 21, 3069-3080.
- 1066 Johnson, D., Horsley, S. W., Moloney, D. M., Oldridge, M., Twigg, S., Walsh, S., Barrow, M.,  
1067 Njølstad, P. R., Kunz, J., Ashworth, G. J., Wall, S. A., Kearney, L. & Wilkie, A. 1998. A  
1068 Comprehensive Screen for TWIST Mutations in Patients with Craniosynostosis  
1069 Identifies a New Microdeletion Syndrome of Chromosome Band 7p21.1. *The American*  
1070 *Journal of Human Genetics*, 63, 1282-1293.
- 1071 Jonsson, P. F. & Bates, P. A. 2006. Global topological features of cancer proteins in the human

- 1072 interactome. *Bioinformatics (Oxford, England)*, 22, 2291-2297.
- 1073 Kang, P. & Svoboda, K. K. H. 2005. Epithelial-Mesenchymal Transformation during Craniofacial  
1074 Development. *Journal of Dental Research*, 84, 678-690.
- 1075 Katayama, Y., Nishiyama, M., Shoji, H., Ohkawa, Y., Kawamura, A., Sato, T., Suyama, M.,  
1076 Takumi, T., Miyakawa, T. & Nakayama, K. I. 2016. CHD8 haploinsufficiency results in  
1077 autistic-like phenotypes in mice. *Nature*, 537, 675-679.
- 1078 Kim, D. & Roux, K. J. 2016. Filling the Void: Proximity-Based Labeling of Proteins in Living Cells.  
1079 *Trends in Cell Biology*, 26, 804-817.
- 1080 Kutejova, E., Sasai, N., Shah, A., Gouti, M. & Briscoe, J. 2016. Neural Progenitors Adopt Specific  
1081 Identities by Directly Repressing All Alternative Progenitor Transcriptional Programs.  
1082 *Developmental cell*, 36, 639-653.
- 1083 Lasrado, R., Boesmans, W., Kleinjung, J., Pin, C., Bell, D., Bhaw, L., Mccallum, S., Zong, H., Luo,  
1084 L., Clevers, H., Vanden Berghe, P. & Pachnis, V. 2017. Lineage-dependent spatial and  
1085 functional organization of the mammalian enteric nervous system. *Science (New York,  
1086 N.Y.)*, 356, 722-726.
- 1087 Laursen, K. B., Mielke, E., Iannaccone, P. & Füchtbauer, E.-M. M. 2007. Mechanism of  
1088 transcriptional activation by the proto-oncogene Twist1. *The Journal of biological  
1089 chemistry*, 282, 34623-34633.
- 1090 Li, H. & Durbin, R. 2009. Fast and accurate short read alignment with Burrows–Wheeler  
1091 transform. *Bioinformatics*, 25, 1754-1760.
- 1092 Li, X., Wang, W., Wang, J., Malovannaya, A., Xi, Y., Li, W., Guerra, R., Hawke, D. H., Qin, J. &  
1093 Chen, J. 2015. Proteomic analyses reveal distinct chromatin-associated and soluble  
1094 transcription factor complexes. *Molecular Systems Biology*, 11, 775.
- 1095 Mandalos, N., Rhinn, M., Granchi, Z., Karampelas, I., Mitsiadis, T., Economides, A. N., Dollé, P.  
1096 & Remboutsika, E. 2014. Sox2 acts as a rheostat of epithelial to mesenchymal  
1097 transition during neural crest development. *Frontiers in physiology*, 5, 345.
- 1098 Mandalos, N. P. & Remboutsika, E. 2017. Sox2: To crest or not to crest? *Seminars in cell &  
1099 developmental biology*, 63, 43-49.
- 1100 Marchant, L., Linker, C., Ruiz, P., Guerrero, N. & Mayor, R. 1998. The inductive properties of  
1101 mesoderm suggest that the neural crest cells are specified by a BMP gradient.  
1102 *Developmental biology*, 198, 319-329.
- 1103 Mayor, R., Guerrero, N. & Martínez, C. 1997. Role of FGF and Noggin in Neural Crest Induction.  
1104 *Developmental Biology*, 189, 1-12.
- 1105 Mazzoni, E. O., Mahony, S., Iacovino, M., Morrison, C. A., Mountoufaris, G., Closser, M., Whyte,  
1106 W. A., Young, R. A., Kyba, M., Gifford, D. K. & Wichterle, H. 2011. Embryonic stem cell–  
1107 based mapping of developmental transcriptional programs. *Nature Methods*, 8.
- 1108 Mclean, C. Y., Bristor, D., Hiller, M., Clarke, S. L., Schaar, B. T., Lowe, C. B., Wenger, A. M. &  
1109 Bejerano, G. 2010. GREAT improves functional interpretation of cis-regulatory regions.  
1110 *Nature Biotechnology*, 28, 495-501.
- 1111 Mei, S., Qin, Q., Wu, Q., Sun, H., Zheng, R., Zang, C., Zhu, M., Wu, J., Shi, X., Taing, L., Liu, T.,  
1112 Brown, M., Meyer, C. A. & Liu, S. X. 2017. Cistrome Data Browser: a data portal for  
1113 ChIP-Seq and chromatin accessibility data in human and mouse. *Nucleic Acids  
1114 Research*, 45.
- 1115 Meier, K. & Brehm, A. 2014. Chromatin regulation: How complex does it get? *Epigenetics*, 9,  
1116 1485-1495.
- 1117 Mistri, T. K., Devasia, A. G., Chu, L. T., Ng, W. P., Halbritter, F., Colby, D., Martynoga, B.,  
1118 Tomlinson, S. R., Chambers, I., Robson, P. & Wohland, T. 2015. Selective influence of

- 1119 Sox2 on POU transcription factor binding in embryonic and neural stem cells. *EMBO*  
1120 *Rep*, 16, 1177-91.
- 1121 Mitra, K., Carvunis, A.-R., Ramesh, S. & Ideker, T. 2013. Integrative approaches for finding  
1122 modular structure in biological networks. *Nature Reviews Genetics*, 14, 719-732.
- 1123 Morishita, M., Mevius, D. & Luccio, E. D. 2014. In vitro histone lysine methylation by NSD1,  
1124 NSD2/MMSET/WHSC1 and NSD3/WHSC1L. *BMC Structural Biology*, 14, 25.
- 1125 Nimura, K., Ura, K., Shiratori, H., Ikawa, M., Okabe, M., Schwartz, R. J. & Kaneda, Y. 2009. A  
1126 histone H3 lysine 36 trimethyltransferase links Nkx2-5 to Wolf–Hirschhorn syndrome.  
1127 *Nature*, 460, 287-291.
- 1128 Okuno, H., Mihara, F., Ohta, S., Fukuda, K., Kurosawa, K., Akamatsu, W., Sanosaka, T.,  
1129 Kohyama, J., Hayashi, K., Nakajima, K., Takahashi, T., Wysocka, J., Kosaki, K. & Okano,  
1130 H. 2017. CHARGE syndrome modeling using patient-iPSCs reveals defective migration  
1131 of neural crest cells harboring CHD7 mutations. *eLife*, 6.
- 1132 Ota, M. S., Loebel, D., O'Rourke, M. P., Wong, N., Tsoi, B. & Tam, P. 2004. Twist is required for  
1133 patterning the cranial nerves and maintaining the viability of mesodermal cells.  
1134 *Developmental Dynamics*, 230, 216-228.
- 1135 Quinlan, A. R. & Hall, I. M. 2010. BEDTools: a flexible suite of utilities for comparing genomic  
1136 features. *Bioinformatics*, 26, 841-842.
- 1137 Rada-Iglesias, A., Bajpai, R., Swigut, T., Brugmann, S. A., Flynn, R. A. & Wysocka, J. 2011. A  
1138 unique chromatin signature uncovers early developmental enhancers in humans.  
1139 *Nature*, 470, 279-283.
- 1140 Ran, F. A., Hsu, P. D., Wright, J., Agarwala, V., Scott, D. A. & Zhang, F. 2013. Genome  
1141 engineering using the CRISPR-Cas9 system. *Nature protocols*, 8, 2281-2308.
- 1142 Rappsilber, J., Mann, M. & Ishihama, Y. 2007. Protocol for micro-purification, enrichment,  
1143 pre-fractionation and storage of peptides for proteomics using StageTips. *Nature*  
1144 *protocols*, 2, 1896-1906.
- 1145 Remboutsika, E., Elkouris, M., Iulianella, A., Andoniadou, C. L., Poulou, M., Mitsiadis, T. A.,  
1146 Trainor, P. A. & Lovell-Badge, R. 2011. Flexibility of neural stem cells. *Frontiers in*  
1147 *physiology*, 2, 16.
- 1148 Robinson, M. D., McCarthy, D. J. & Smyth, G. K. 2010. edgeR: a Bioconductor package for  
1149 differential expression analysis of digital gene expression data. *Bioinformatics*, 26,  
1150 139-140.
- 1151 Roux, K. J., Kim, D., Raida, M. & Burke, B. 2012. A promiscuous biotin ligase fusion protein  
1152 identifies proximal and interacting proteins in mammalian cells. *The Journal of Cell*  
1153 *Biology*, 196, 801-810.
- 1154 Sahni, N., Yi, S., Taipale, M., Fuxman bass, J. I., Coulombe-Huntington, J., Yang, F., Peng, J.,  
1155 Weile, J., Karras, G. I., Wang, Y., Kovács, I. A., Kamburov, A., Krykbaeva, I., Lam, M. H.,  
1156 Tucker, G., Khurana, V., Sharma, A., Liu, Y.-Y., Yachie, N., Zhong, Q., Shen, Y., Palagi, A.,  
1157 San-Miguel, A., Fan, C., Balcha, D., Dricot, A., Jordan, D. M., Walsh, J. M., Shah, A. A.,  
1158 Yang, X., Stoyanova, A. K., Leighton, A., Calderwood, M. A., Jacob, Y., Cusick, M. E.,  
1159 Salehi-Ashtiani, K., Whitesell, L. J., Sunyaev, S., Berger, B., Barabási, A.-L., Charloteaux,  
1160 B., Hill, D. E., Hao, T., Roth, F. P., Xia, Y., Walkout, A., Lindquist, S. & Vidal, M. 2015.  
1161 Widespread Macromolecular Interaction Perturbations in Human Genetic Disorders.  
1162 *Cell*, 161, 647-660.
- 1163 Saint-Jeannet, J. P., He, X., Varmus, H. E. & Dawid, I. B. 1997. Regulation of dorsal fate in the  
1164 neuraxis by Wnt-1 and Wnt-3a. *Proceedings of the National Academy of Sciences of*  
1165 *the United States of America*, 94, 13713-13718.

- 1166 Sauka-Spengler, T. & Bronner-Fraser, M. 2008. A gene regulatory network orchestrates neural  
1167 crest formation. *Nature Reviews Molecular Cell Biology*, 9, 557-568.
- 1168 Schindelin, J., Arganda-Carreras, I., Frise, E., Kaynig, V., Longair, M., Pietzsch, T., Preibisch, S.,  
1169 Rueden, C., Saalfeld, S., Schmid, B., Tinevez, J.-Y. Y., White, D. J., Hartenstein, V., Eliceiri,  
1170 K., Tomancak, P. & Cardona, A. 2012. Fiji: an open-source platform for biological-  
1171 image analysis. *Nature methods*, 9, 676-682.
- 1172 Schulz, Y., Wehner, P., Opitz, L., Salinas-Riester, G., Bongers, E. M., Van Ravenswaaij-Arts, C.  
1173 M., Wincent, J., Schoumans, J., Kohlhase, J., Borchers, A. & Pauli, S. 2014. CHD7, the  
1174 gene mutated in CHARGE syndrome, regulates genes involved in neural crest cell  
1175 guidance. *Human genetics*, 133, 997-1009.
- 1176 Shannon, P., Markiel, A., Ozier, O., Baliga, N. S., Wang, J. T., Ramage, D., Amin, N., Schwikowski,  
1177 B. & Ideker, T. 2003. Cytoscape: a software environment for integrated models of  
1178 biomolecular interaction networks. *Genome research*, 13, 2498-2504.
- 1179 Sharan, R., Ulitsky, I. & Shamir, R. 2007. Network-based prediction of protein function.  
1180 *Molecular systems biology*, 3, 88.
- 1181 Sharma, K., Weber, C., Bairlein, M., Greff, Z., Kéri, G., Cox, J., Olsen, J. V. & Daub, H. 2009.  
1182 Proteomics strategy for quantitative protein interaction profiling in cell extracts.  
1183 *Nature Methods*, 6.
- 1184 Sibbritt, T., Osteil, P., Fan, X., Sun, J., Salehin, N., Knowles, H., Shen, J. & Tam, P. P. L. 2019.  
1185 Gene Editing of Mouse Embryonic and Epiblast Stem Cells. *Methods Mol Biol*, 1940,  
1186 77-95.
- 1187 Singh, S. & Gramolini, A. O. 2009. Characterization of sequences in human TWIST required for  
1188 nuclear localization. *BMC cell biology*, 10, 47.
- 1189 Soldatov, R., Kaucka, M., Kastriti, M. E., Petersen, J., Chontorotzea, T., Englmaier, L.,  
1190 Akkuratova, N., Yang, Y., Häring, M., Dyachuk, V., Bock, C., Farlik, M., Piacentino, M.  
1191 L., Boismoreau, F., Hilscher, M. M., Yokota, C., Qian, X., Nilsson, M., Bronner, M. E.,  
1192 Croci, L., Hsiao, W.-Y. Y., Guertin, D. A., Brunet, J.-F. F., Consalez, G. G., Ernfors, P.,  
1193 Fried, K., Kharchenko, P. V. & Adameyko, I. 2019. Spatiotemporal structure of cell fate  
1194 decisions in murine neural crest. *Science (New York, N.Y.)*, 364.
- 1195 Song, J. & Singh, M. 2009. How and when should interactome-derived clusters be used to  
1196 predict functional modules and protein function? *Bioinformatics (Oxford, England)*, 25,  
1197 3143-3150.
- 1198 Soo, K., O'rourke, M. P., Khoo, P.-L. L., Steiner, K. A., Wong, N., Behringer, R. R. & Tam, P. P.  
1199 2002. Twist function is required for the morphogenesis of the cephalic neural tube  
1200 and the differentiation of the cranial neural crest cells in the mouse embryo.  
1201 *Developmental biology*, 247, 251-270.
- 1202 Spicer, D. B., Rhee, J., Cheung, W. L. & Lassar, A. B. 1996. Inhibition of myogenic bHLH and  
1203 MEF2 transcription factors by the bHLH protein Twist. *Science (New York, N.Y.)*, 272,  
1204 1476-1480.
- 1205 Szklarczyk, D., Franceschini, A., Wyder, S., Forslund, K., Heller, D., Huerta-Cepas, J., Simonovic,  
1206 M., Roth, A., Santos, A., Tsafou, K. P., Kuhn, M., Bork, P., Jensen, L. J. & Von Mering, C.  
1207 2015. STRING v10: protein-protein interaction networks, integrated over the tree of  
1208 life. *Nucleic acids research*, 43, 52.
- 1209 Theveneau, E. & Mayor, R. 2012. Neural crest migration: interplay between chemorepellents,  
1210 chemoattractants, contact inhibition, epithelial–mesenchymal transition, and  
1211 collective cell migration. *Wiley Interdisciplinary Reviews: Developmental Biology*, 1,  
1212 435-445.

- 1213 Tischfield, M. A., Robson, C. D., Gilette, N. M., Chim, S., Sofela, F. A., Delisle, M. M., Gelber, A.,  
1214 Barry, B. J., Mackinnon, S., Dagi, L. R., Nathans, J. & Engle, E. C. 2017. Cerebral Vein  
1215 Malformations Result from Loss of Twist1 Expression and BMP Signaling from Skull  
1216 Progenitor Cells and Dura. *Developmental cell*, 42, 445-46100000.
- 1217 Varshney, M. K., Inzunza, J., Lupu, D., Ganapathy, V., Antonson, P., Rüegg, J., Nalvarte, I. &  
1218 Gustafsson, J.-Å. 2017. Role of estrogen receptor beta in neural differentiation of  
1219 mouse embryonic stem cells. *Proceedings of the National Academy of Sciences*, 114.
- 1220 Vincentz, J. W., Firulli, B. A., Lin, A., Spicer, D. B., Howard, M. J. & Firulli, A. B. 2013. Twist1  
1221 controls a cell-specification switch governing cell fate decisions within the cardiac  
1222 neural crest. *PLoS genetics*, 9.
- 1223 Vokes, S. A., Ji, H., Mccuine, S., Tenzen, T., Giles, S., Zhong, S., Longabaugh, W. J. R., Davidson,  
1224 E. H., Wong, W. H. & McMahon, A. P. 2007. Genomic characterization of Gli-activator  
1225 targets in sonic hedgehog-mediated neural patterning. *Development*, 134, 1977-1989.
- 1226 Waardenberg, A. J. 2017. Statistical Analysis of ATM-Dependent Signaling in Quantitative  
1227 Mass Spectrometry Phosphoproteomics. *ATM Kinase: Methods and Protocols*.
- 1228 Wakamatsu, Y., Endo, Y., Osumi, N. & Weston, J. A. 2004. Multiple roles of Sox2, an HMG-box  
1229 transcription factor in avian neural crest development. *Developmental dynamics : an  
1230 official publication of the American Association of Anatomists*, 229, 74-86.
- 1231 Ying, Q.-L. L., Wray, J., Nichols, J., Batlle-Morera, L., Doble, B., Woodgett, J., Cohen, P. & Smith,  
1232 A. 2008. The ground state of embryonic stem cell self-renewal. *Nature*, 453, 519-523.
- 1233 Zhang, S., Bell, E., Zhi, H., Brown, S., Imran, S. a. M. a. M., Azuara, V. & Cui, W. 2019. OCT4 and  
1234 PAX6 determine the dual function of SOX2 in human ESCs as a key pluripotent or  
1235 neural factor. *Stem cell research & therapy*, 10, 122.
- 1236 Zhang, Y., Liu, T., Meyer, C. A., Eeckhoute, J., Johnson, D. S., Bernstein, B. E., Nusbaum, C.,  
1237 Myers, R. M., Brown, M., Li, W. & Liu, X. S. 2008. Model-based analysis of ChIP-Seq  
1238 (MACS). *Genome biology*, 9.
- 1239 Zhao, H., Feng, J., Ho, T.-V. V., Grimes, W., Urata, M. & Chai, Y. 2015. The suture provides a  
1240 niche for mesenchymal stem cells of craniofacial bones. *Nature cell biology*, 17, 386-  
1241 396.



1242 **Supplemental Figures**

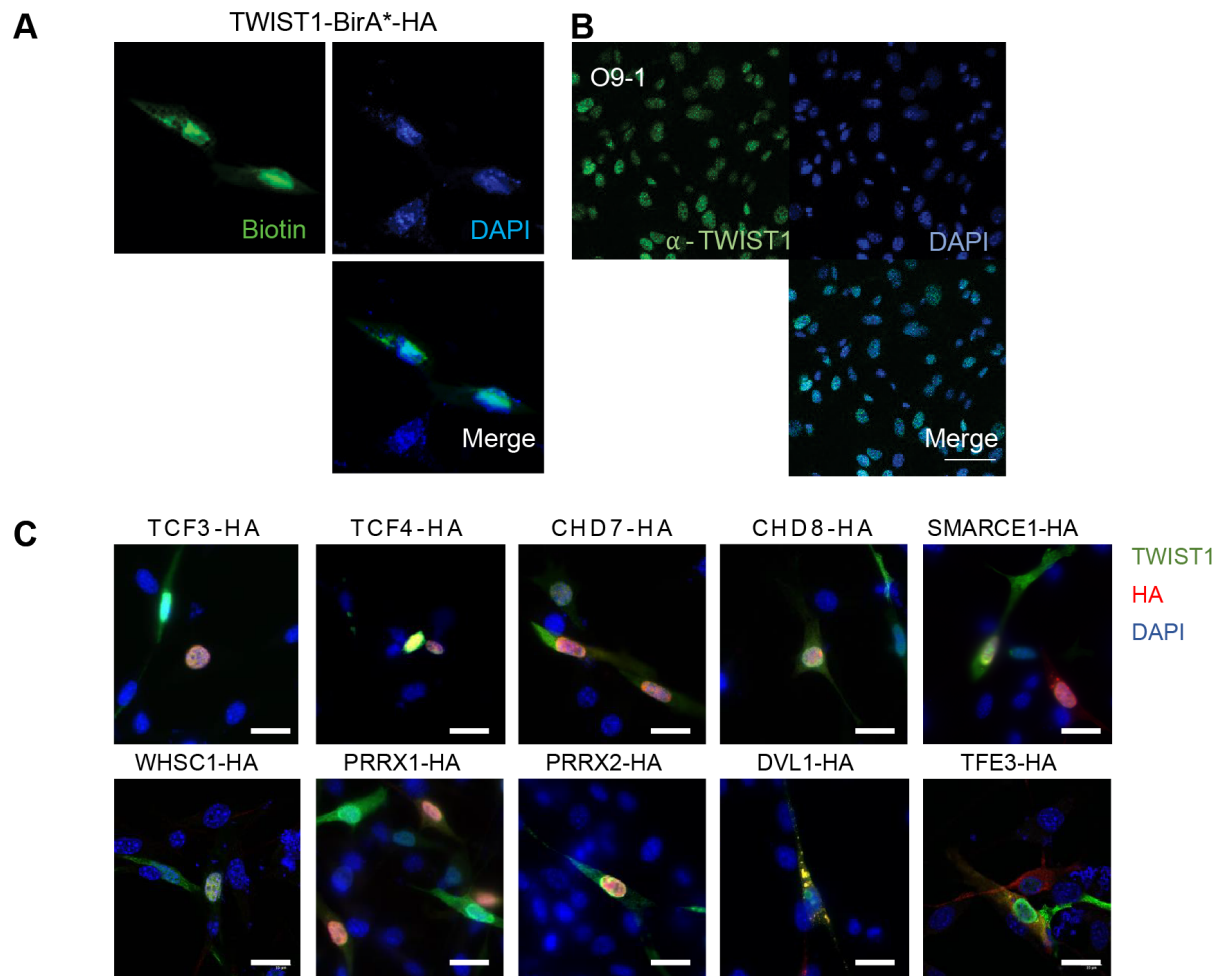

1243

1244 **Figure S1. Nuclear localization of TWIST1-BirA\* biotinylated proteins recapitulates that of the**  
1245 **endogenous TWIST1. A.** Immunofluorescence analysis revealed co-localization of TWIST1-BirA\*  
1246 (HA tagged) and biotinylated proteins (labelled with streptavidin-GFP) in the nucleus in NCCs. Bar =  
1247 20  $\mu$ m. **B.** Expression and localization of endogenous TWIST1 in untransfected cells stained by  $\alpha$ -  
1248 TWIST1. Bar = 50  $\mu$ m. **C.** Immunofluorescence detection of proteins in cells co-expressing FLAG-  
1249 TWIST1 ( $\alpha$ -TWIST1) and HA-tagged proteins ( $\alpha$ -HA). Nuclei were stained by DAPI.



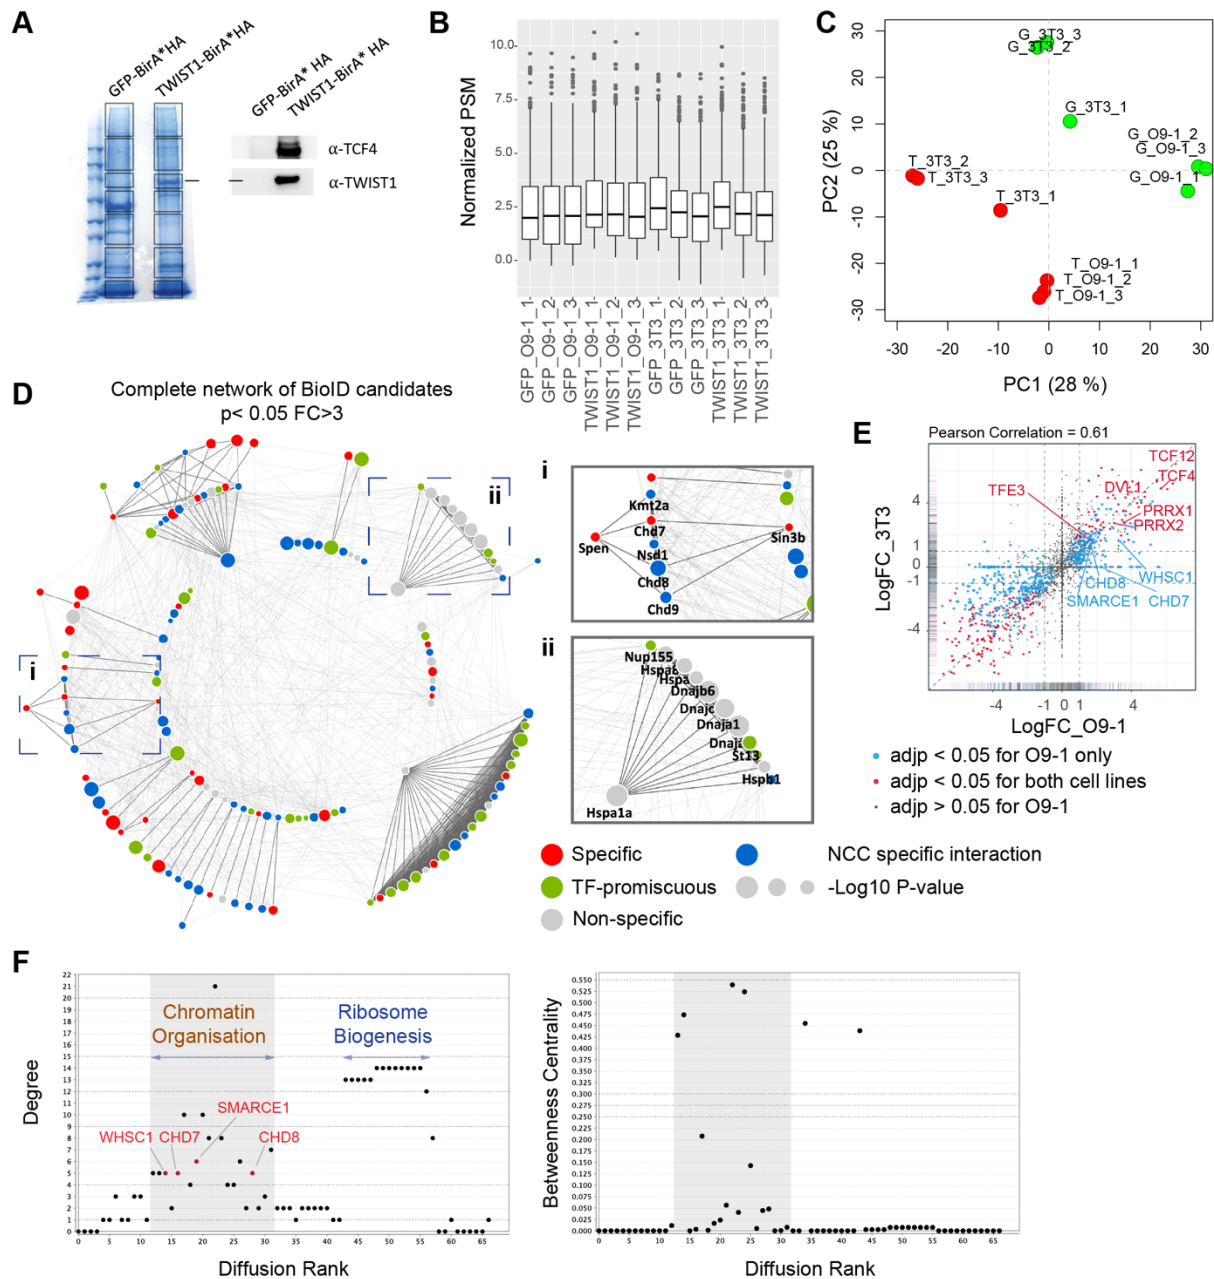

1250

1251 **Figure S2. Identification of core NCC regulators within the TWIST1-CRM.** **A.** Profile of  
 1252 streptavidin-purified proteins in GFP-BirA\* and TWIST1-BirA\*-expressing 3T3 cells visualized by  
 1253 Coomassie staining (left panel). Box: Gel bands sampled for mass spectrometry analysis. Expression  
 1254 of the TWIST1-BirA\*HA encoded by the transgene and TCF4, a known TWIST1 interactor, by  
 1255 Western blot analysis of the streptavidin-beads purified proteins (right panel). **B.** Mean peptide  
 1256 spectrum match (PSM) across samples, normalized by total PSM of the peptide library. **C.** PCA plot of  
 1257 normalized PSM data. Green dots, GFP-BirA\* (G) groups; Red dots, TWIST1-BirA\*(T) groups. **D.**  
 1258 Complete network of 140 BioID candidates ( $P < 0.05$ ; Fold-change > 3; PSM# > 2) interacting  
 1259 physically with TWIST1 in the O9-1 neural crest stem cells. Functional interactions (edges) of these  
 1260 candidates based on prior evidences of co-expression, protein-protein interaction, evolutionary

1261 conservation and text mining were retrieved from STRING database (Szklarczyk *et al.*, 2015). Medium  
1262 confidence (combined score > 0.4) was used as the cut-off for interactions. The MCL algorithm was  
1263 used to generate protein interaction hubs with strongest connection (dark edges). Result from previous  
1264 protein interaction survey of 56 TFs (Li *et al.*, 2015) was referenced to annotate putative specific (red),  
1265 non-specific (grey) or promiscuous TF interactors (green) among the BioID candidates. Blue nodes are  
1266 putative specific TWIST1 partners not annotated in Li *et al.* study. Node size =  $-\text{Log}_{10}(\text{P-value})$ . **i** &  
1267 **ii**. Example clusters. **E**. Pairwise correlation of TWIST1 BioID data from O9-1 NCCs (x-axis) versus  
1268 3T3 fibroblasts (y-axis). Each data point represents one protein, plotted with their log<sub>2</sub> fold change of  
1269 PSM in TWIST1-BirA\* versus GFP group (Log<sub>2</sub>FC). Point density were represented by rug plot next  
1270 to the axis. Adjusted P-values (adjp) were generated with EdgeR package using negative binomial  
1271 model: blue, adjp < 0.05 (significant) for O9-1 but not 3T3, red, adjp < 0.05 for both cell lines, black,  
1272 adjp > 0.05 for O9-1. **F**. Plots generated by NetworkAnalyzer (Assenov *et al.*, 2008) for Diffusion Rank  
1273 of nodes against **(i)** Degree of connection (number of edges), **(ii)** Between-ness centrality, a measures  
1274 of how fast information spreads to other nodes. Cluster where peaks of highly connected nodes were  
1275 labelled in **(i)**. Putative neural crest disease factors are likely to arise in the shaded region.

1276

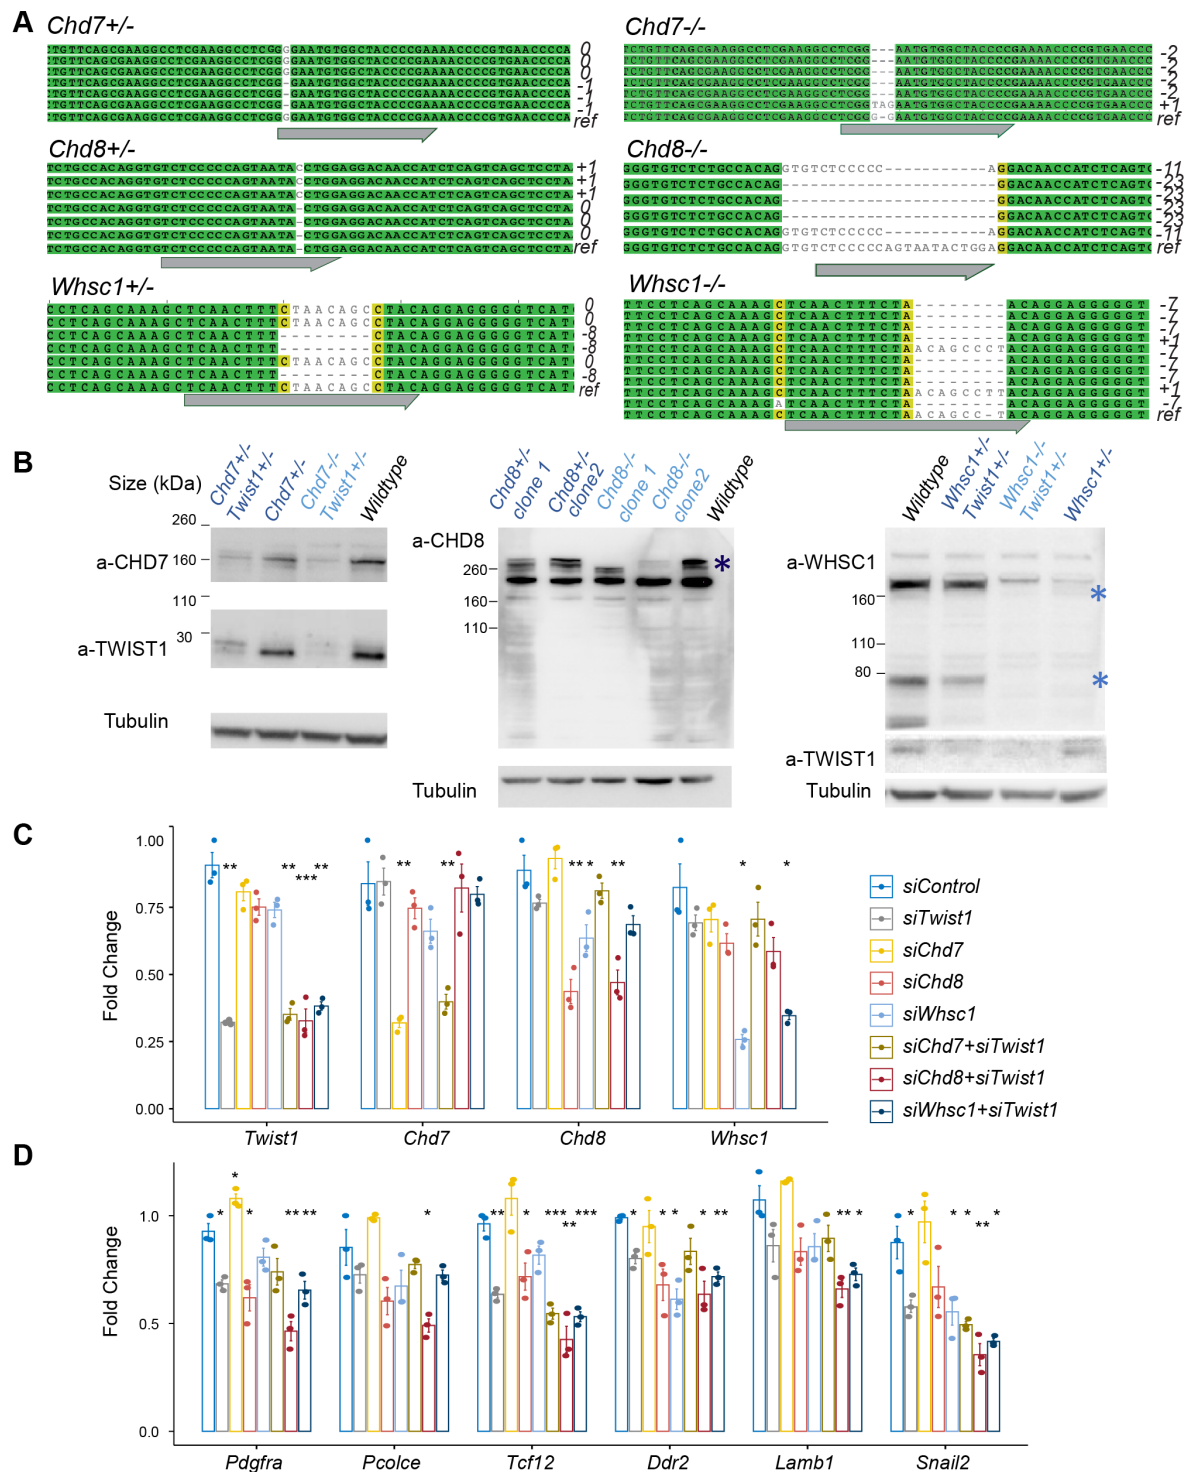

1277

1278 **Figure S3. Characterization of CRISPR knockout clones and siRNA knockdown efficiency. A.**

1279 Genotyping result of CRISPR targeted locus in clones with frame-shift mutations. ref,

1280 reference/wildtype; Grey arrow, guide RNA targeted site. **B.** Western blot analysis of protein using

1281 corresponding antibodies. Expression of Twist1-chromatin regulators was induced by neurogenic

1282 differentiation treatment (day 3). Predicted protein sizes were marked by \* in WHSC1 and CHD8 blots.

1283 qPCR analysis of O9-1 NCCs after 24-hour siRNA treatment (see Methods). **C, D.** qPCR results for

1284 siRNA targeted genes and EMT markers in the knockdown groups. qPCR signals were normalized  
1285 against average expression of three housekeeping genes (*Gapdh*, *Tbp*, *Actb*) and displayed as fold  
1286 change +/- SE against control for each treatment. P-values generated using one-way ANOVA. \*P <  
1287 0.05, \*\*P < 0.01, \*\*\*P < 0.001. ns, not significant.  
1288

1289

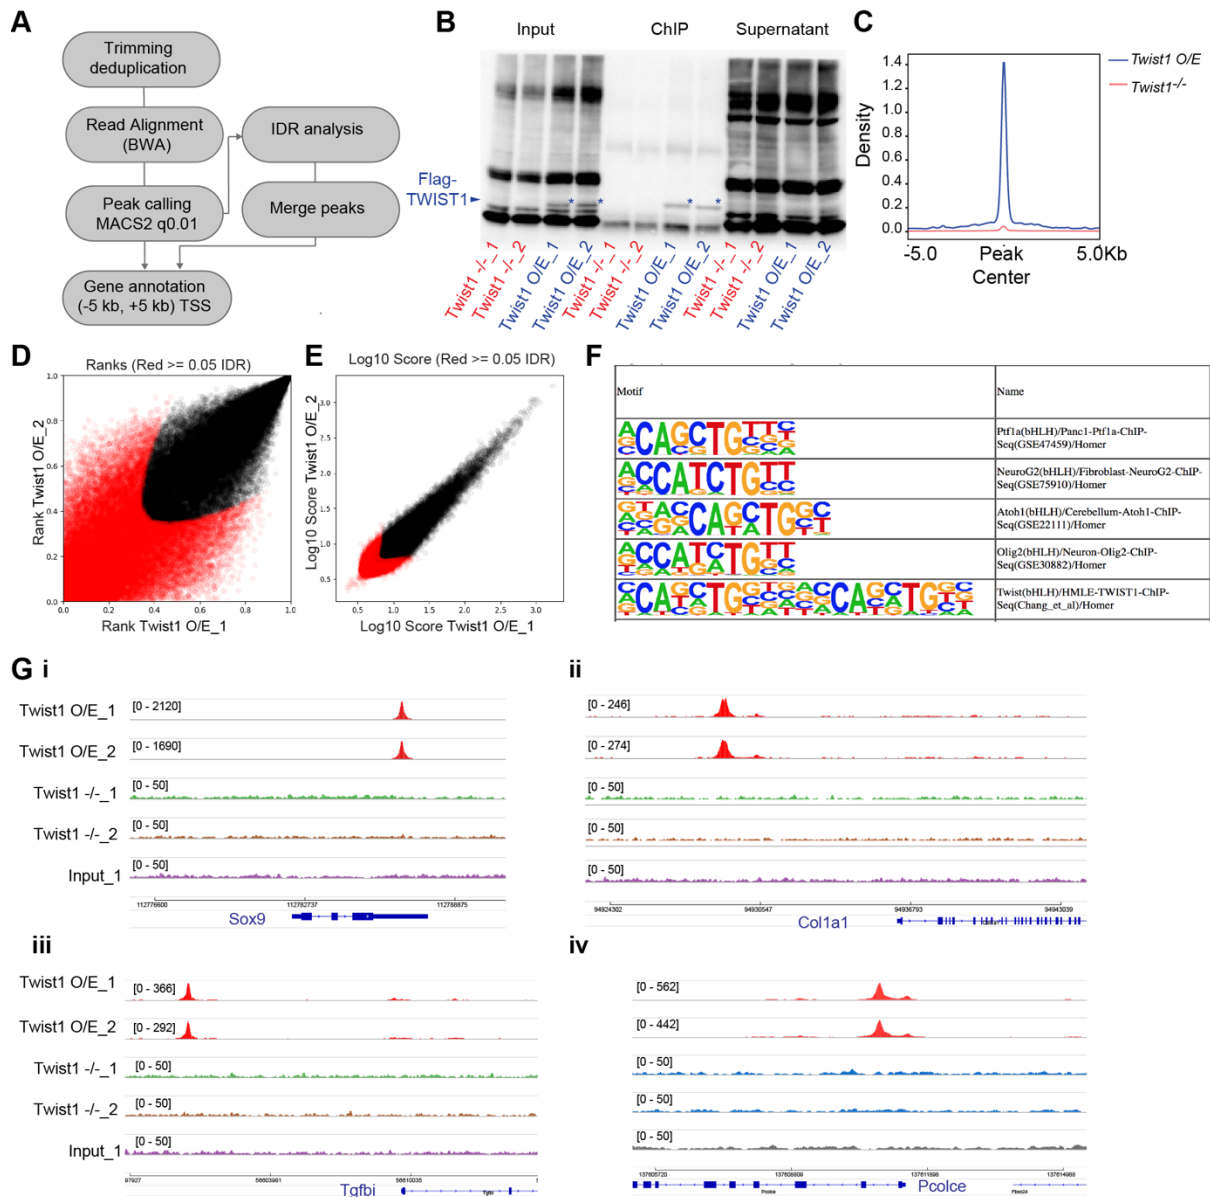

1290

1291 **Figure S4. TWIST1 ChIP-seq experiment in ESC-derived neuroepithelial cells.** A. ChIP-seq data  
 1292 analysis pipeline adapted from ENCODE project (Encode, 2012). B. Quality control of chromatin  
 1293 immunoprecipitation specificity. \* TWIST1 protein band. C. ChIP-seq density profile (rpkm) on mouse  
 1294 genome. D, E. IDR analysis showing peaks with significant correlation between replicate experiments  
 1295 (black dots). F. Motif enriched in TWIST1-bound chromatin regions. G. IGV track showing specific  
 1296 DNA amplification at validated TWIST1 target regions in *Twist1 O/E* but not *Twist1-null* or input ChIP  
 1297 samples.

1298

1299

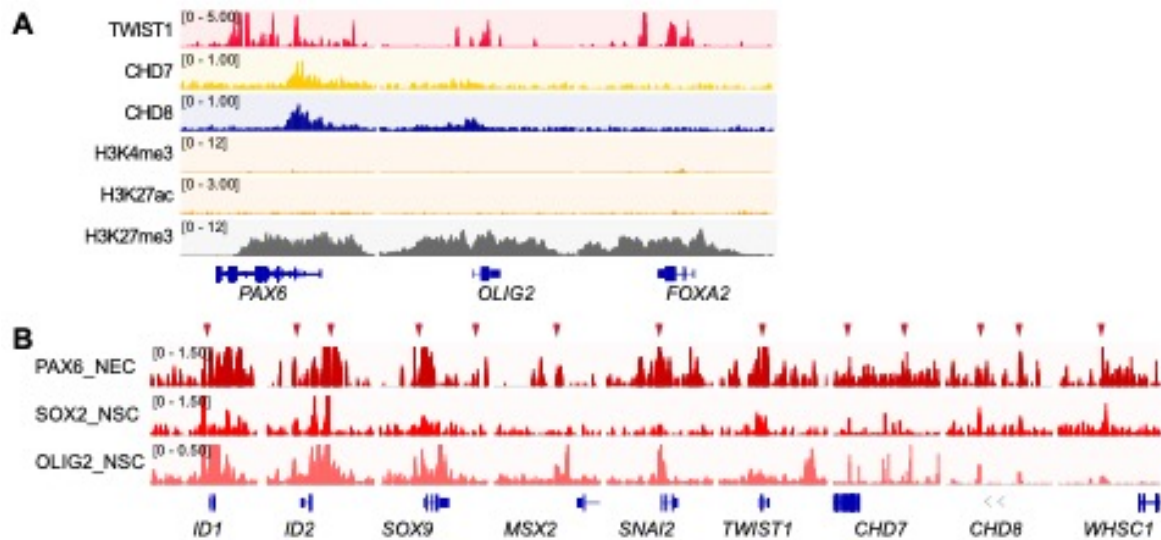

1300

1301 **Figure S5. Chromatin binding of TWIST1 and interactors and NSC transcription factors.** A.  
 1302 ChIP-seq signal of core TWIST1-chromatin regulators and H3K27me3 histone mark at NSC  
 1303 transcription factors, demonstrating repressed chromatin state. Genes diagrams are indicated (bottom  
 1304 row). B. ChIP-seq signal overlaps (red arrows) for NSC transcription factors at gene locus of NCC  
 1305 specification and NCC-CRM factors. Genes diagrams are indicated (bottom row). Data for NSC TFs  
 1306 (Hikichi *et al.*, 2013; Mistri *et al.*, 2015; Kutejova *et al.*, 2016) were obtained from the Cistrome  
 1307 database (Mei *et al.*, 2017).

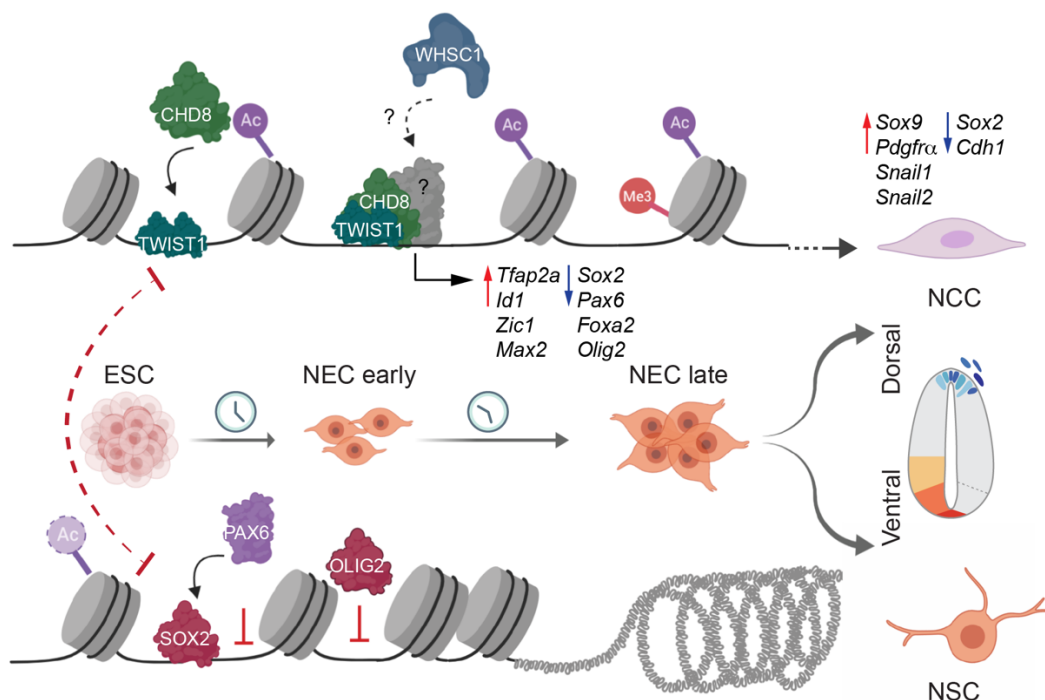

1308

1309 **Figure S6. Molecular model of the NCC vs NSC fate decision in neuroepithelium.** During NCC  
 1310 specification and dorsal-ventral neural tube axis formation, TWIST1 initiates the assembly of chromatin



1311 regulators at the regulatory elements of genes that promote NCC identity and EMT, while repress the  
1312 expression of NSC TFs. Meanwhile, the NSC TFs: SOX2, PAX6 and OLIG2, competitively occupies  
1313 these regions to restrict transcriptional activities of the NCC program and enhance the bias towards  
1314 NSC fates.

1315 ***Supplemental Tables***

1316 **Table S1** BioID EdgeR test result table

1317 **Table S2** TWIST1 protein interaction module and Gene Ontology analysis

1318 **Table S3** BioID candidates selected for validation

1319 **Table S4** Integrative analysis of ChIP datasets

1320 **Table S5** BioMark reporter card setup

1321 **Table S6** Key resources

1322

1323

1324

1325

1326 **Table S3. Information on BioID candidates selected for validation**

1327 Cell line of origin of the candidate is listed. Expression data of the embryonic head was from  
 1328 published study (Fan *et al.*, 2016). Log2 FC = log2 transformed PSM fold-change between TWIST1-  
 1329 BirA\*HA and GFP transfected O9-1 cells. Adjusted p-value was computed from dataset from O9-1  
 1330 cell line, generated by the likelihood ratio test corrected by the Benjamini & Hochberg method in  
 1331 EdgeR (Robinson *et al.*, 2010). The rank of candidates in heat diffusion from genes associated with  
 1332 human and mouse facial malformation are listed.

| <i>Gene ID</i> | <i>Cell line</i> | <i>Expression in embryo</i> | <i>PSM</i> | <i>Log2FC</i> | <i>Adjusted value</i> | <i>p-</i> | <i>Function</i>                                 | <i>Diffusion Rank</i> |
|----------------|------------------|-----------------------------|------------|---------------|-----------------------|-----------|-------------------------------------------------|-----------------------|
| Tfe3           | O9-1 & 3T3       | Y                           | 12.3       | 1.639         | 0.001706              |           | bHLH factor; TGF-beta signaling                 | 24                    |
| Smarce1        | O9-1             | Y                           | 15.5       | 1.762         | 0.0001697             |           | Chromatin regulator<br>SWI/SNF complex          | 19                    |
| Chd7           | O9-1             | Y                           | 11.4       | 2.212         | 0.0001491             |           | Chromodomain<br>Helicase DNA Binding<br>Protein | 16                    |
| Chd8           | O9-1             | Y                           | 46.5       | 1.656         | 2.45E-09              |           | Chromodomain<br>Helicase DNA Binding<br>Protein | 28                    |
| Prrx1          | O9-1 & 3T3       | Y                           | 25.1       | 3.55          | 1.05E-13              |           | DNA binding,<br>transcriptional<br>coactivation | 8                     |
| Prrx2          | O9-1 & 3T3       | Y                           | 10.4       | 3.012         | 9.78E-06              |           | DNA binding,<br>transcriptional<br>coactivation | 7                     |
| Dvl1           | O9-1 & 3T3       | Y                           | 3          | 2.949         | 0.02028               |           | WNT signaling<br>receptor Dishevelled           | 1                     |
| Whsc1          | O9-1             | Y                           | 12.4       | 3.324         | 4.74E-07              |           | Histone methylation<br>H2K36                    | 14                    |
| Tcf12          | O9-1 & 3T3       | Y                           | 10.3       | 6.386         | 8.10E-09              |           | bHLH factor                                     | 8                     |
| Tcf4           | O9-1 & 3T3       | Y                           | 6.4        | 5.7           | 4.58E-06              |           | bHLH Factor                                     | 16                    |

1333

1334
