# Supplementary material for: TWIST1 and chromatin regulatory proteins interact to guide neural crest cell differentiation
Source: bioRxiv preprint, doi:10.1101/2020.09.06.285387, version 1 (2020-09-07)
Supplement: Supplemental_Table_S4 [file 285387_file04.xlsx]

## Sheet: ChIP-seq target overlap
[TWIST1] and [Chd7]:	[TWIST1] and [Chd8]:
LYPLA1	XKR4
ATP6V1H	MRPL15
ST18	LYPLA1
MYBL1	TCEA1
SULF1	ATP6V1H
NCOA2	NPBWR1
TRAM1	RB1CC1
EYA1	ST18
TERF1	PCMTD1
STAU2	SNTG1
UBE2W	RRS1
CRISPLD1	ADHFE1
NA	MYBL1
PAQR8	VCPIP1
EFHC1	SNHG6
TMEM14A	SNORD87
FAM135A	TCF24
COL19A1	PPP1R42
LMBRD1	COPS5
PHF3	CSPP1
RAB23	ARFGEF1
BAG2	PREX2
PTPN18	SULF1
HS6ST1	SLCO5A1
ARID5A	NCOA2
ANKRD39	TRAM1
SEMA4C	LACTB2
MGAT4A	EYA1
TSGA10	MSC
LIPT1	TRPA1
MRPL30	TERF1
TXNDC9	SBSPON
EIF5B	RDH10
PDCL3	RPL7
TPP2	STAU2
KDELC1	UBE2W
BIVM	TMEM70
ERCC5	JPH1
COL5A2	CRISPLD1
NABP1	NA
NEMP2	TFAP2B
MFSD6	MCM3
HIBCH	PAQR8
PMS1	EFHC1
ORMDL1	TRAM2
OSGEPL1	TMEM14A
CCDC150	KCNQ5
GTF3C3	OGFRL1
COQ10B	B3GAT2
HSPD1	SMAP1
HSPE1	SDHAF4
MOB4	FAM135A
RFTN2	COL19A1
TYW5	LMBRD1
SPATS2L	ADGRB3
KCTD18	PHF3
NIF3L1	PIH1D3
PPIL3	PRIM2
TMEM237	RAB23
FZD7	BAG2
SUMO1	BEND6
BMPR2	DST
FAM117B	IMP4
ICA1L	CCDC115
NBEAL1	PTPN18
CYP20A1	FAM168B
ABI2	HS6ST1
PARD3B	UGGT1
INO80D	NEURL3
KLF7	ARID5A
CREB1	KANSL3
METTL21A	FER1L5
PLEKHM3	LMAN2L
PIKFYVE	CNNM4
PTH2R	CNNM3
UNC80	ANKRD39
ACADL	SEMA4C
LANCL1	COX5B
BARD1	ACTR1B
PECR	TMEM131
TMEM169	INPP4A
XRCC5	COA5
RPL37A	UNC50
IGFBP2	MGAT4A
CTDSP1	TSGA10
CNPPD1	LIPT1
DNAJB2	MITD1
TMEM198	MRPL30
CHPF	TXNDC9
MOGAT1	EIF5B
ACSL3	REV1
WDFY1	LONRF2
FBXO36	CHST10
TRIP12	PDCL3
SLC16A14	RPL31
CAB39	TBC1D8
COPS7B	CNOT11
GIGYF2	RNF149
USP40	CREG2
RAMP1	MAP4K4
PER2	SLC9A2
ASB1	MFSD9
MTERF4	POU3F3
D2HGDH	MRPS9
ST8SIA4	TGFBRAP1
PPIP5K2	NCK2
GIN1	UXS1
PAM	TPP2
PIGN	TEX30
KDSR	KDELC1
VPS4B	BIVM
NIFK	ERCC5
CLASP1	GULP1
GLI2	COL5A2
EPB41L5	WDR75
PTPN4	SLC40A1
TMEM177	SLC39A10
DDX18	NABP1
ACTR3	MYO1B
EIF2D	STAT1
SRGAP2	GLS
FAM72A	NAB1
NUCKS1	NEMP2
KLHDC8A	MFSD6
DSTYK	INPP1
RBBP5	HIBCH
PIK3C2B	PMS1
PPP1R12B	ORMDL1
ARL8A	OSGEPL1
NAV1	ASNSD1
CSRP1	STK17B
CACNA1S	HECW2
DDX59	CCDC150
KIF14	GTF3C3
DENND1B	PGAP1
ASPM	ANKRD44
KCNT2	SF3B1
CDC73	COQ10B
GLRX2	HSPD1
TROVE2	HSPE1
UCHL5	MOB4
RGS2	RFTN2
RGS13	MARS2
HMCN1	PLCL1
RNF2	SATB2
FAM129A	TYW5
EDEM3	SPATS2L
TSEN15	KCTD18
COLGALT2	AOX1
SMG7	CLK1
DHX9	NIF3L1
STX6	PPIL3
TOR1AIP2	ORC2
TOR1AIP1	CFLAR
RALGPS2	CASP8
MRPS14	TRAK2
ZBTB37	STRADB
GAS5	TMEM237
SNORD47	ALS2
KLHL20	FZD7
PIGC	SUMO1
DNM3OS	NOP58
METTL13	BMPR2
GORAB	FAM117B
SLC19A2	ICA1L
TIPRL	CARF
DCAF6	WDR12
MPC2	NBEAL1
CREG1	CYP20A1
NUF2	ABI2
ATF6	RAPH1
DUSP12	PARD3B
PFDN2	NRP2
NIT1	INO80D
VANGL2	NDUFS1
PEX19	EEF1B2
DCAF8	SNORA41
CASQ1	ZDBF2
FMN2	GPR1
PLD5	ADAM23
EFCAB2	MDH1B
CDC42BPA	FASTKD2
PARP1	KLF7
MIXL1	CREB1
H3F3A	METTL21A
TMEM63A	CCNYL1
LBR	FZD5
DISP1	PLEKHM3
37316	IDH1
RAB3GAP2	PIKFYVE
IARS2	PTH2R
BPNT1	MAP2
EPRS	UNC80
KCTD3	RPE
PTPN14	KANSL1L
PROX1	ACADL
FLVCR1	LANCL1
DTL	ERBB4
INTS7	IKZF2
RCOR3	SPAG16
KCNH1	VWC2L
HHAT	BARD1
PLEKHG1	ATIC
MTHFD1L	FN1
MTRF1L	MREG
LATS1	PECR
UST	TMEM169
SASH1	XRCC5
SAMD5	SMARCAL1
SHPRH	RPL37A
FBXO30	IGFBP2
EPM2A	IGFBP5
UTRN	TNS1
SF3B5	ARPC2
LTV1	AAMP
FUCA2	PNKD
ADAT2	CATIP
PEX3	CTDSP1
CITED2	MIR26B
TXLNB	USP37
NHSL1	BCS1L
PERP	RNF25
AHI1	STK36
TBPL1	TTLL4
CTGF	WNT6
ENPP3	CRYBA2
MED23	IHH
SMLR1	CNPPD1
TMEM200A	ZFAND2B
ARHGAP18	ABCB6
ECHDC1	ATG9A
RNF146	ANKZF1
HINT3	GLB1L
NCOA7	STK16
CLVS2	TUBA4A
RWDD1	DNAJB2
DSE	PTPRN
TSPYL4	RESP18
HDAC2	GMPPA
MARCKS	ASIC4
FAM229B	TMEM198
TUBE1	CHPF
RPF2	OBSL1
GTF3C6	INHA
SEC63	STK11IP
BEND3	EPHA4
PRDM1	SGPP2
PREP	FARSB
LIN28B	MOGAT1
GRIK2	ACSL3
ASCC3	SCG2
DCBLD1	AP1S3
SLC35F1	WDFY1
ASF1A	SERPINE2
MCM9	CUL3
GJA1	DOCK10
SERINC1	IRS1
PKIB	RHBDD1
FABP7	MFF
LIMS1	DNER
CCDC138	FBXO36
40422	TRIP12
SOWAHC	SLC16A14
P4HA1	CAB39
DNAJB12	ITM2C
DDIT4	GPR55
TYSND1	PSMD1
VPS26A	ARMC9
KIF1BP	NCL
TET1	SNORD82
DNA2	NMUR1
RUFY2	PTMA
HNRNPH3	PDE6D
HERC4	COPS7B
SIRT1	NPPC
LRRTM3	DIS3L2
JMJD1C	PRSS56
REEP3	CHRND
NRBF2	EFHD1
RTKN2	GIGYF2
CDK1	ATG16L1
CCDC6	DGKD
SLC16A9	USP40
TFAM	HJURP
UBE2D1	ARL4C
PCDH15	SH3BP4
SPECC1L	AGAP1
GUCD1	GBX2
SNRPD3	LRRFIP1
PRMT2	RAMP1
FAM207A	UBE2F
SYDE1	SCLY
C2CD4C	ILKAP
TPGS1	HES6
CDC34	PER2
BSG	TRAF3IP1
R3HDM4	ASB1
KISS1R	TWIST2
CNN2	HDAC4
ABCA7	NDUFA10
STK11	GPC1
MIDN	MIR149
EFNA2	ANKMY1
NDUFS7	DUSP28
MEX3D	RNPEPL1
TCF3	CAPN10
KLF16	KIF1A
SLC39A3	MTERF4
DAPK3	PASK
FZR1	PPP1R7
CHST11	HDLBP
NUAK1	FARP2
POLR3B	STK25
RFX4	BOK
TMEM263	THAP4
CRY1	ATG4B
DRAM1	DTYMK
GAS2L3	ING5
ANKS1B	D2HGDH
TMPO	FAM174A
RMST	ST8SIA4
ELK3	PPIP5K2
NTN4	GIN1
VEZT	PAM
FGD6	CDH20
NR2C1	RNF152
SOCS2	PIGN
MRPL42	TNFRSF11A
UBE2N	ZCCHC2
EEA1	PHLPP1
LUM	BCL2
DUSP6	KDSR
LRRIQ1	VPS4B
SLC6A15	CDH7
LIN7A	TSN
PPP1R12A	NIFK
PAWR	CLASP1
E2F7	GLI2
ZDHHC17	INHBB
OSBPL8	TMEM185B
BBS10	EPB41L5
NAP1L1	PTPN4
PHLDA1	TMEM177
KRR1	CFAP221
TPH2	TMEM37
TMEM19	DBI
THAP2	EN1
ZFC3H1	INSIG2
CCT2	CCDC93
FRS2	DDX18
MDM2	DPP10
NUP107	ACTR3
RAP1B	SLC35F5
CAND1	GPR39
HELB	LYPD1
TMBIM4	NCKAP5
LLPH	CCNT2
MSRB3	RAB3GAP1
RASSF3	ZRANB3
SRGAP1	R3HDM1
TMEM5	UBXN4
AVPR1A	MCM6
MIRLET7I	DARS
USP15	CXCR4
FAM19A2	THSD7B
LRIG3	CD55
CTDSP2	YOD1
AGAP2	MAPKAPK2
MBD6	DYRK3
DDIT3	EIF2D
GLI1	SRGAP2
INHBC	FAM72A
R3HDM2	SLC41A1
NACA	RAB29
STAT2	NUCKS1
IL23A	SLC45A3
PAN2	ELK4
ANKRD52	CDK18
ZC3H10	KLHDC8A
ERBB3	NUAK2
IKZF4	TMCC2
SFI1	DSTYK
NF2	RBBP5
NIPSNAP1	MDM4
THOC5	PIK3C2B
EWSR1	PPP1R15B
RHBDD3	PLEKHA6
XBP1	GOLT1A
CCDC117	ETNK2
MRPS24	SOX13
PPIA	SNRPE
H2AFV	ZBED6
PURB	ZC3H11A
CCM2	ATP2B4
TBRG4	BTG2
ADCY1	CHIT1
IGFBP3	MYBPH
HUS1	ADORA1
EGFR	TMEM183A
FBXO48	CYB5R1
PLEK	ADIPOR1
PNO1	KLHL12
WDR92	RABIF
SPRED2	KDM5B
ACTR2	SYT2
CEP68	PPP1R12B
SLC1A4	UBE2T
AFTPH	ARL8A
VPS54	GPR37L1
UGP2	ELF3
CCT4	RNPEP
PUS10	TIMM17A
PEX13	LMOD1
CCDC88A	SHISA4
MTIF2	IPO9
EML6	NAV1
SPTBN1	CSRP1
ACYP2	PHLDA3
PSME4	TMEM9
CHAC2	ASCL5
BOD1	CACNA1S
SH3PXD2B	KIF21B
UBTD2	CAMSAP2
STK10	DDX59
RANBP17	KIF14
FAM196B	NEK7
MAT2B	LHX9
HMMR	DENND1B
NUDCD2	CRB1
RNF145	ASPM
EBF1	KCNT2
THG1L	CDC73
NIPAL4	GLRX2
ZFP62	TROVE2
MGAT1	UCHL5
HNRNPH1	RGS2
CLK4	BRINP3
PHYKPL	PTGS2
N4BP3	TPR
JADE2	HMCN1
UBE2B	IVNS1ABP
CDKL3	SWT1
GDF9	TRMT1L
UQCRQ	RNF2
SLC22A4	FAM129A
CDC42SE2	EDEM3
HINT1	TSEN15
CCDC69	COLGALT2
SPARC	RGL1
GALNT10	ARPC5
SH3BP5L	SMG7
RNF187	NMNAT2
IBA57	LAMC1
COPS3	DHX9
PEMT	NPL
SREBF1	RGS16
DRG2	RNASEL
LLGL1	GLUL
EPN2	IER5
ULK2	STX6
ZSWIM7	XPR1
TTC19	ACBD6
NCOR1	LHX4
PIGL	QSOX1
FBXW10	CEP350
TVP23B	TOR1AIP2
HS3ST3A1	TOR1AIP1
MAP2K4	SOAT1
CFAP52	ABL2
STX8	TOR3A
MYH10	FAM20B
RPL26	RALGPS2
SLC25A35	RASAL2
TMEM107	ASTN1
CYB5D1	RFWD2
DNAH2	MRPS14
EFNB3	CACYBP
ATP1B2	RABGAP1L
NLGN2	ZBTB37
TMEM256	GAS5
PLSCR3	SNORD47
EIF5A	DARS2
ACADVL	CENPL
DLG4	KLHL20
SPAG7	ANKRD45
NUP88	PRDX6
RPAIN	SUCO
MIS12	PIGC
DERL2	DNM3
AIPL1	METTL13
NCBP3	VAMP4
TAX1BP3	PRRC2C
EMC6	PRRX1
MNT	GORAB
HIC1	KIFAP3
MIR212	SCYL3
MIR132	METTL18
INPP5K	SLC19A2
VPS53	NME7
GLOD4	BLZF1
NXN	ATP1B1
BLMH	SFT2D2
ABHD15	TIPRL
NUFIP2	DCAF6
MYO18A	MPC2
PIPOX	MPZL1
SEZ6	CREG1
DHRS13	POU2F1
ERAL1	MAEL
UNC119	ILDR2
WSB1	TADA1
NF1	POGK
SUZ12	FAM78B
CRLF3	UCK2
TEFM	TMCO1
MYO1D	ALDH9A1
TMEM98	MGST3
PEX12	PBX1
APPBP2	NUF2
BRIP1	HSD17B7
INTS2	UAP1
CLTC	NOS1AP
YPEL2	OLFML2B
GDPD1	ATF6
SMG8	DUSP12
COIL	SDHC
HLF	MPZ
NME1	PCP4L1
SPAG9	APOA2
TOB1	TOMM40L
LUC7L3	NDUFS2
ANKRD40	ADAMTS4
CACNA1G	B4GALT3
RSAD1	PPOX
COL1A1	USP21
SLC35B1	UFC1
SNF8	DEDD
SNX11	PFDN2
NFE2L1	NIT1
CDK5RAP3	KLHDC9
FBXL20	USF1
STARD3	VANGL2
PNMT	PEX19
GSDMA	DCAF8
PSMD3	KCNJ9
WIPF2	KCNJ10
P3H4	PIGM
FKBP10	IGSF9
ACLY	TAGLN2
CNP	DUSP23
DNAJC7	CADM3
NKIRAS2	FMN2
STAT3	RGS7
HSD17B1	KMO
BECN1	CHML
PSME3	OPN3
RPL27	PLD5
RND2	ZBTB18
VAT1	ADSS
BRCA1	EFCAB2
NBR1	SMYD3
ETV4	TFB2M
PYY	CNST
NAGS	SCCPDH
LSM12	AHCTF1
G6PC3	CDC42BPA
ATXN7L3	PSEN2
RUNDC3A	ITPKB
FZD2	PARP1
GJC1	LIN9
HEXIM2	MIXL1
GOSR2	ACBD3
CDC27	H3F3A
MRC2	SDE2
TACO1	PYCR2
CCDC47	LEFTY1
SMARCD2	TMEM63A
KPNA2	EPHX1
PITPNC1	NVL
AMZ2	CNIH4
SLC16A6	WDR26
MAP2K6	CNIH3
TTYH2	LBR
SLC9A3R1	ENAH
CDR2L	SRP9
KCTD2	DEGS1
CASKIN2	FBXO28
TSEN54	CAPN2
UNK	DISP1
UBALD2	AIDA
CBX2	BROX
CBX8	MIA3
TBC1D16	TAF1A
CCDC40	DUSP10
BAHCC1	HLX
NPLOC4	MARK1
TSPAN10	RAB3GAP2
HGS	IARS2
ARL16	BPNT1
MRPL12	EPRS
SLC25A10	LYPLAL1
ANAPC11	TGFB2
ALYREF	RRP15
ASPSCR1	KCTD3
DCXR	CENPF
FASN	PTPN14
CCDC57	SMYD2
SLC16A3	PROX1
RAB40B	RPS6KC1
RAB10	ANGEL2
DNAJC27	VASH2
ITSN2	FLVCR1
FAM228B	BATF3
PFN4	NENF
UBXN2A	TMEM206
ATAD2B	PPP2R5A
HS1BP3	DTL
RHOB	INTS7
TTC32	LPGAT1
KCNS3	RCOR3
GEN1	KCNH1
DDX1	HHAT
NBAS	SERTAD4
FAM84A	SYT14
TRIB2	DIEXF
E2F6	PLXNA2
ASAP2	CD46
ITGB1BP1	CR1L
CPSF3	PPP1R14C
ADAM17	PLEKHG1
SOX11	MTHFD1L
DCDC2C	AKAP12
RNASEH1	ZBTB2
PXDN	ARMT1
CBLL1	RMND1
SLC26A4	SYNE1
CCDC71L	FBXO5
SNX13	MTRF1L
ISPD	RGS17
ETV1	CNKSR3
IFRD1	ULBP1
IMMP2L	LRP11
NOVA1	PCMT1
PRKD1	NUP43
G2E3	LATS1
SCFD1	KATNA1
HECTD1	GINM1
HEATR5A	PPIL4
DTD2	UST
NUBPL	SASH1
ARHGAP5	SAMD5
AKAP6	STXBP5
NPAS3	ADGB
SPTSSA	RAB32
EAPP	GRM1
BAZ1A	SHPRH
PPP2R3C	FBXO30
NFKBIA	EPM2A
RALGAPA1	UTRN
MIPOL1	STX11
SEC23A	SF3B5
TRAPPC6B	PLAGL1
PNN	LTV1
RPS29	FUCA2
LRR1	ADAT2
DNAAF2	PEX3
POLE2	AIG1
KLHDC2	HIVEP2
NEMF	ADGRG6
VCPKMT	VTA1
SOS2	CITED2
L2HGDH	TXLNB
ATP5S	HECA
SAV1	ABRACL
NIN	REPS1
TRIM9	CCDC28A
DAAM1	NHSL1
L3HYPDH	HEBP2
JKAMP	ARFGEF3
MNAT1	PERP
PPP2R5E	TNFAIP3
WDR89	IFNGR1
SGPP1	IL20RA
SYNE2	SLC35D3
ZBTB25	MAP3K5
ZBTB1	MAP7
PIGH	BCLAF1
ZFP36L1	MTFR2
ACTN1	AHI1
DCAF5	MYB
EXD2	HBS1L
COX16	SGK1
DNAL1	SLC2A12
PNMA1	TBPL1
PTGR2	EYA4
FAM161B	RPS12
COQ6	SNORA33
ABCD4	STX7
RPS6KL1	MOXD1
EIF2B2	CTGF
FLVCR2	ENPP1
SNW1	ENPP3
GTF2A1	MED23
KCNK10	AKAP7
SPATA7	EPB41L2
PTPN21	SMLR1
ZC3H14	TMEM200A
TTC8	L3MBTL3
FOXN3	ARHGAP18
CALM1	SOGA3
RPS6KA5	ECHDC1
PPP4R3A	RNF146
TRIP11	RSPO3
ATXN3	CENPW
DICER1	TRMT11
CYP46A1	HINT3
SLC25A29	NCOA7
MIR345	HEY2
DYNC1H1	HDDC2
MOK	TPD52L1
RCOR1	RNF217
MARK3	NKAIN2
ADSSL1	CLVS2
WDR60	RSPH4A
SP4	ZUFSP
ITGB8	RWDD1
GDI2	DSE
NET1	TSPYL1
KLF6	TSPYL4
GTPBP4	NT5DC1
LARP4B	HS3ST5
RYR2	HDAC2
B3GALNT2	MARCKS
GLI3	LAMA4
SUGCT	FAM229B
MPLKIP	TUBE1
RALA	FYN
AMPH	TRAF3IP2
STARD3NL	REV3L
PGBD1	SLC16A10
ZSCAN26	RPF2
ZKSCAN8	GTF3C6
HIST1H2BN	AMD1
HIST1H4K	CDC40
HIST1H2AK	WASF1
HIST1H1B	GPR6
HIST1H2BK	FIG4
HIST1H2AH	ZBTB24
HIST1H2BJ	PPIL6
HIST1H4I	SMPD2
HIST1H2AG	CD164
ABT1	CEP57L1
HIST1H4H	SESN1
HIST1H3G	ARMC2
HIST1H3F	FOXO3
HIST1H2BH	SNX3
HIST1H1D	NR2E1
HIST1H3E	OSTM1
HIST1H2BG	SEC63
HIST1H2AD	SCML4
HIST1H2AE	SOBP
HIST1H2BF	PDSS2
HIST1H4D	BEND3
HIST1H1E	QRSL1
HIST1H2BC	RTN4IP1
HIST1H2AC	ATG5
HIST1H4C	PRDM1
HIST1H1C	PREP
HIST1H3B	POPDC3
HIST1H4B	LIN28B
HIST1H1A	HACE1
HIST1H4A	GRIK2
HIST1H3A	ASCC3
ACOT13	SIM1
TDP2	VGLL2
NRSN1	DCBLD1
DUSP22	GOPC
NQO2	NUS1
PRPF4B	SLC35F1
ECI2	CEP85L
RPP40	ASF1A
SSR1	MCM9
RIOK1	TBC1D32
CAGE1	GJA1
TMEM14C	HSF2
MAK	SERINC1
SMIM13	PKIB
TBC1D7	FABP7
SIRT5	SMPDL3A
RANBP9	LIMS1
MCUR1	RANBP2
ATXN1	CCDC138
NUP153	SH3RF3
DEK	SOWAHC
ID4	P4HA1
BICD2	MCU
CENPP	MICU1
NOL8	DNAJB12
SPIN1	DDIT4
HIST1H2AL	ASCC1
S1PR3	ANAPC16
SHC3	SPOCK2
CKS2	CHST3
SECISBP2	PSAP
CPLX2	CDH23
THOC3	SLC29A3
ARL10	UNC5B
NOP16	PCBD1
HIGD2A	SGPL1
CLTB	PALD1
PFN3	EIF4EBP2
GRK6	LRRC20
B4GALT7	PPA1
PCBD2	SAR1A
SMAD5	TYSND1
SPOCK1	H2AFY2
HNRNPA0	COL13A1
KIF27	NEUROG3
RMI1	TSPAN15
HNRNPK	SUPV3L1
AGTPBP1	VPS26A
GOLM1	KIF1BP
ISCA1	DDX21
ZCCHC6	DDX50
DAPK1	STOX1
FANCC	CCAR1
ERCC6L2	TET1
PDCD6	SLC25A16
SDHA	DNA2
CCDC127	RUFY2
ELL2	HNRNPH3
ARSK	ATOH7
TTC37	HERC4
NR2F1	SIRT1
ARRDC3	DNAJC12
ADGRV1	LRRTM3
LYSMD3	JMJD1C
POLR3G	REEP3
MBLAC2	NRBF2
CETN3	EGR2
VCAN	ADO
ATG10	RTKN2
SSBP2	ARID5B
FAM151B	TMEM26
ZFYVE16	RHOBTB1
MTX3	CDK1
LHFPL2	ANK3
TBCA	CCDC6
WDR41	SLC16A9
ZBED3	FAM13C
F2R	PHYHIPL
IQGAP2	BICC1
POC5	TFAM
HMGCR	UBE2D1
HEXB	CISD1
ENC1	IPMK
TNPO1	ZWINT
CENPH	PCDH15
PIK3R1	GNAZ
NLN	RSPH14
SGTB	RAB36
TRAPPC13	BCR
TRIM23	SPECC1L
CWC27	GUCD1
SREK1IP1	SNRPD3
FAM159B	LRRC75B
DEPDC1B	GGT5
RAB3C	CABIN1
GPBP1	PRMT2
MAP3K1	DIP2A
IL6ST	PCNT
PLPP1	SLC19A1
GPX8	COL18A1
SNX18	POFUT2
ARL15	ADARB1
FST	FAM207A
PELO	PTTG1IP
ITGA1	SUMO3
EMB	UBE2G2
PXK	PFKL
PDHB	DNMT3L
RPL15	TRAPPC10
UBE2E1	AGPAT3
NID2	RRP1
GNG2	CSTB
SAYSD1	PDXK
DNAJC9	ILVBL
MRPS16	SYDE1
NDST2	MIER2
KAT6B	C2CD4C
POLR3A	SHC2
RPS24	MADCAM1
ZCCHC24	TPGS1
ARF4	CDC34
APPL1	BSG
FAM208A	POLRMT
WNT5A	FGF22
LRTM1	RNF126
DCP1A	FSTL3
DNAH1	PALM
DPH3	PTBP1
OXNAD1	PLPPR3
SNCG	R3HDM4
MMRN2	KISS1R
BMPR1A	ARID3A
WAPL	WDR18
CCSER2	GRIN3B
PSMC6	TMEM259
DDHD1	CNN2
WDHD1	ABCA7
SOCS4	POLR2E
MAPK1IP1L	GPX4
FBXO34	STK11
AP5M1	CBARP
EXOC5	ATP5D
CCNB1IP1	MIDN
PARP2	CIRBP
RPPH1	EFNA2
ANG	MUM1
RNASE4	NDUFS7
RNASE6	GAMT
NDRG2	DAZAP1
ARHGEF40	RPS15
TOX4	APC2
RAB2B	PCSK4
SALL2	REEP6
LRP10	ADAMTSL5
PRMT5	MEX3D
AJUBA	MBD3
CDH24	UQCR11
EFS	TCF3
MYH7	ATP8B3
NRL	REXO1
DCAF11	KLF16
IPO4	ABHD17A
NFATC4	SCAMP4
CENPJ	ADAT3
PARP4	CSNK1G2
ZMYM5	BTBD2
IFT88	MKNK2
SKA3	MOB3A
MRPL57	IZUMO4
SPATA13	AP3D1
SACS	DOT1L
EBPL	SF3A2
SPRYD7	PLEKHJ1
TRIM13	OAZ1
FAM167A	SPPL2B
MTMR9	LSM7
MSRA	TIMM13
KIF13B	LMNB2
HMBOX1	GADD45B
INTS9	GNG7
ELP3	DIRAS1
ADRA1A	SLC39A3
EBF2	SGTA
NKX2-6	THOP1
TNFRSF10B	MAP2K2
CCAR2	ZBTB7A
PDLIM2	PIAS4
RCBTB2	EEF2
RB1	SNORD37
NUDT15	DAPK3
SUCLA2	ATCAY
ZC3H13	ZFR2
TPT1	MATK
SNORA31	APBA3
TSC22D1	MRPL54
LACC1	TJP3
CCDC122	PIP5K1C
NAA16	CACTIN
WBP4	GIPC3
SUGT1	HMG20B
PCDH17	MFSD12
TDRD3	FZR1
PCDH9	DOHH
DACH1	SMIM24
PIBF1	NFIC
DIS3	NCLN
TBC1D4	GNA11
SLAIN1	AES
NDFIP2	TLE2
SPRY2	TLE6
GPC5	SIRT6
GPC6	ANKRD24
DNAJC3	TDG
PCCA	GLT8D2
FGF14	HCFC2
GHR	NFYB
RPL37	CHST11
SNORD72	APPL2
DAB2	NUAK1
WDR70	CKAP4
SLC1A3	TCP11L2
SPEF2	POLR3B
RAI14	RFX4
AMACR	RIC8B
TARS	TMEM263
SUB1	MTERF2
MTMR12	CRY1
GOLPH3	BTBD11
PDZD2	PWP1
DROSHA	PRDM4
CDH10	ASCL4
BASP1	RTCB
FBXL7	FBXO7
38777	TIMP3
CCT5	HSP90B1
FAM173B	NT5DC3
SDC2	PARPBP
MTDH	NUP37
RPL30	DRAM1
RIDA	GNPTAB
POP1	CHPT1
VPS13B	ARL1
COX6C	UTP20
RRM2B	GAS2L3
UBR5	SCYL2
AZIN1	ACTR6
ATP6V1C1	ANKS1B
RIMS2	APAF1
ZFPM2	IKBIP
EIF3E	SLC25A3
ENY2	TMPO
NUDCD1	RMST
EBAG9	NEDD1
MED30	CDK17
TNFRSF11B	ELK3
MAL2	AMDHD1
NOV	CCDC38
DSCC1	SNRPF
MRPL13	NTN4
MTBP	USP44
HAS2	VEZT
ZHX1	FGD6
TMEM65	NR2C1
RNF139	NDUFA12
LRRC6	TMCC3
ZFAT	CEP83
KHDRBS3	PLXNC1
CHRAC1	CRADD
PTK2	SOCS2
ARC	MRPL42
RHPN1	UBE2N
MAF1	NUDT4
SHARPIN	EEA1
CPSF1	BTG1
VPS28	POC1B
MFSD3	GALNT4
COMMD5	DUSP6
MYH9	TMTC3
TXN2	CEP290
EIF3D	ALX1
GGA1	LRRIQ1
MICALL1	SLC6A15
SLC16A8	METTL25
MAFF	CCDC59
TMEM184B	ACSS3
CSNK1E	LIN7A
FAM227A	MYF6
CBY1	PPP1R12A
CBX6	PAWR
RPL3	SYT1
SNORD43	E2F7
TNRC6B	CSRP2
SGSM3	ZDHHC17
ST13	OSBPL8
XPNPEP3	BBS10
EP300	NAP1L1
ZC3H7B	PHLDA1
TOB2	KRR1
SREBF2	GLIPR1L2
POLDIP3	CAPS2
RNU12	KCNC2
ARFGAP3	ATXN7L3B
MCAT	TRHDE
PNPLA3	TPH2
CDPF1	TBC1D15
MLC1	RAB21
MOV10L1	TMEM19
MAPK11	THAP2
PPP6R2	ZFC3H1
TYMP	LGR5
KLHDC7B	KCNMB4
ALG10B	CNOT2
CPNE8	RAB3IP
KIF21A	CCT2
ABCD2	FRS2
SLC2A13	YEATS4
PDZRN4	CPSF6
YAF2	MDM2
TWF1	SLC35E3
ANO6	NUP107
ARID2	RAP1B
SLC38A4	MDM1
RPAP3	DYRK2
HDAC7	CAND1
KANSL2	GRIP1
TUBA1B	HELB
DNAJC22	TMBIM4
SPATS2	LLPH
MCRS1	HMGA2
TMBIM6	MSRB3
NCKAP5L	LEMD3
AQP5	WIF1
SMARCD1	TBC1D30
CERS5	GNS
LARP4	RASSF3
DIP2B	TBK1
SLC11A2	XPOT
TFCP2	SRGAP1
BIN2	TMEM5
FIGNL2	AVPR1A
ATG101	PPM1H
TNS2	MIRLET7I
AAAS	MON2
CLUAP1	USP15
TFAP4	FAM19A2
UBALD1	LRIG3
TXNDC11	CTDSP2
GSPT1	TSFM
MCM4	METTL21B
PRKDC	METTL1
FGD4	CYP27B1
TOP3B	CDK4
YPEL1	TSPAN31
MIR130B	AGAP2
MIR301B	OS9
THAP7	B4GALNT1
P2RX6	SLC26A10
MRPL40	ARHGEF25
EIF2B5	DTX3
TMEM41A	PIP4K2C
IGF2BP2	KIF5A
ETV5	DCTN2
RFC4	MBD6
LPP	DDIT3
LSG1	MARS
PPP1R2	ARHGAP9
DLG1	GLI1
MELTF	INHBC
PAK2	R3HDM2
PIGX	NDUFA4L2
CEP19	SHMT2
RNF168	NXPH4
PCYT1A	LRP1
SLC51A	STAT6
RUBCN	NAB2
FYTTD1	NEMP1
LRCH3	ZBTB39
UMPS	PRIM1
KALRN	NACA
CCDC14	PTGES3
SEMA5B	ATP5B
DIRC2	BAZ2A
HSPBAP1	RBMS2
PARP9	GLS2
DTX3L	SPRYD4
HGD	MIP
FSTL1	TIMELESS
LRRC58	APOF
TIMMDC1	STAT2
ZBTB20	IL23A
USF3	PAN2
BOC	CNPY2
GTPBP8	CS
TAGLN3	COQ10A
ABHD10	ANKRD52
PLCXD2	NABP2
DPPA4	RNF41
DZIP3	SMARCC2
IFT57	MYL6
CD47	MYL6B
NFKBIZ	ESYT1
ZBTB11	ZC3H10
TFG	RPL41
TMEM45A	PA2G4
TBC1D23	ERBB3
DCBLD2	RPS26
ST3GAL6	IKZF4
NSUN3	SUOX
ARL13B	RAB5B
PROS1	CDK2
EPHA3	PMEL
CGGBP1	DGKA
GBE1	PYM1
ROBO2	DNAJC14
RBM11	SARNP
CXADR	ORMDL2
MRPL39	GDF11
JAM2	CD63
CYYR1	RDH5
LTN1	BLOC1S1
RWDD2B	ITGA7
CCT8	SFI1
SOD1	EIF4ENIF1
PAXBP1	DRG1
IFNAR1	PATZ1
RCAN1	PIK3IP1
CBR3	LIMK2
MORC3	RNF185
HLCS	PLA2G3
RIPPLY3	SMTN
TTC3	TUG1
PIGP	OSBP2
PSMG1	DUSP18
HMGN1	SLC35E4
LCA5L	TCN2
SH3BGR	PES1
B3GALT5	SEC14L2
SCAF8	RNF215
TMEM242	CCDC157
SYNJ2	SF3A1
SERAC1	TBC1D10A
GTF2H5	OSM
EZR	LIF
AGPAT4	HORMAD2
MAP3K4	MTMR3
TCP1	ASCC2
MRPL18	ZMAT5
WTAP	UQCR10
SOD2	CABP7
CHD1	NF2
RGMB	NIPSNAP1
LIX1	THOC5
PRSS27	AP1B1
ATP6V0C	GAS2L1
ABCA3	EWSR1
TSC2	RHBDD3
NTHL1	EMID1
MRPS34	KREMEN1
EME2	ZNRF3
NME3	XBP1
CACNA1H	CCDC117
FAM173A	MRPS24
WDR24	URGCP
RHOT2	DBNL
WFIKKN1	POLM
DUSP1	AEBP1
CREBRF	POLD2
HMGA1	YKT6
TAF11	NUDCD3
PPARD	DDX56
RPL10A	TMED4
TEAD3	OGDH
ARMC12	PPIA
STK38	H2AFV
SRSF3	PURB
PPIL1	SNHG15
PIM1	CCM2
WDR4	TBRG4
NDUFV3	ADCY1
PRAM1	IGFBP3
RAB11B	TNS3
NDUFA7	HUS1
RPS28	UPP1
CD320	VWC2
TNFRSF21	IKZF1
SLC35B2	FIGNL1
SLC29A1	GRB10
TMEM63B	COBL
MRPL14	VSTM2A
MAD2L1BP	EGFR
GTPBP2	FBXO48
SRF	CNRIP1
CNPY3	PLEK
TBCC	PNO1
UBR2	WDR92
FOXP4	ETAA1
KIF6	MEIS1
KAT2B	SPRED2
CCDC94	ACTR2
STAP2	RAB1A
DPP9	CEP68
RPL36	SLC1A4
CLPP	SERTAD2
GTF2F1	AFTPH
KHSRP	LGALSL
GPR108	PELI1
TRIP10	VPS54
FER	UGP2
RAB31	MDH1
TWSG1	WDPCP
MTCL1	OTX1
TMEM200C	B3GNT2
DLGAP1	COMMD1
MYL12B	CCT4
MYL12A	FAM161A
NDC80	XPO1
MEMO1	USP34
TTC27	AHSA2
FAM98A	PUS10
CDC42EP3	PEX13
RMDN2	REL
CYP1B1	PAPOLG
HNRNPLL	BCL11A
SRSF7	FANCL
GEMIN6	PNPT1
MAP4K3	PPP4R3B
PLEKHH2	CCDC88A
PPM1B	MTIF2
EPAS1	CLHC1
PIGF	RPS27A
CRIPT	RTN4
CALM2	EML6
KCNK12	SPTBN1
FOXN2	ACYP2
STON1	PSME4
METTL4	CHAC2
CREM	STC2
BAMBI	BOD1
MAP3K8	CPEB4
EPC1	SNRNP25
RAB18	RHBDF1
MPP7	MPG
ROCK1	NPRL3
ESCO1	SH3PXD2B
SNRPD1	UBTD2
NPC1	STK10
OSBPL1A	FBXW11
IMPACT	FGF18
CDH2	NPM1
DSC2	TLX3
B4GALT6	RANBP17
TRAPPC8	FAM196B
NOL4	SPDL1
MAPRE2	PANK3
INO80C	RARS
GALNT1	WWC1
FHOD3	MAT2B
SFT2D3	HMMR
MAP3K2	NUDCD2
BIN1	CCNG1
WDR36	GABRA1
STARD4	GABRB2
APC	PTTG1
REEP5	C1QTNF2
FAM13B	PWWP2A
KDM3B	TTC1
EGR1	UBLCP1
HSPA9	RNF145
SIL1	EBF1
CYSTM1	CLINT1
HBEGF	LSM11
PCDHAC1	THG1L
DIAPH1	SOX30
PCDH1	ADAM19
RNF14	CYFIP2
NDFIP1	MED7
YIPF5	RACK1
KCTD16	SNORD96A
SH3RF2	TRIM41
LARS	TRIM7
RBM27	ZFP62
MCC	MGAT1
YTHDC2	CNOT6
CCDC112	GFPT2
TMED7	MAPK9
DTWD2	RNF130
DMXL1	TBC1D9B
SRFBP1	SQSTM1
CEP120	MGAT4B
MIR1258	LTC4S
PHAX	MAML1
ALDH7A1	CANX
LMNB1	HNRNPH1
SMIM3	RUFY1
DCTN4	ZFP2
RBM22	CLK4
MYOZ3	COL23A1
NDST1	PHYKPL
ARSI	HNRNPAB
SLC26A2	NHP2
GRPEL2	RMND5B
NEDD4L	N4BP3
MALT1	JADE2
PMAIP1	CDKN2AIPNL
MC4R	UBE2B
GNAL	CDKL3
CHMP1B	PPP2CA
MPPE1	TCF7
IMPA2	VDAC1
CIDEA	FSTL4
AFG3L2	HSPA4
SPIRE1	ZCCHC10
CEP76	AFF4
PSMG2	GDF9
FAM210A	UQCRQ
RNMT	SHROOM1
STARD6	KIF3A
POLI	IL13
SMAD4	RAD50
ME2	IRF1
SMAD2	SLC22A5
HAUS1	SLC22A4
ATP5A1	P4HA2
SETBP1	ACSL6
PQLC1	FNIP1
NETO1	RAPGEF6
SOCS6	CDC42SE2
IGHMBP2	LYRM7
MRPL21	HINT1
CPT1A	GPX3
KMT5B	ANXA6
ALDH3B1	CCDC69
NUDT8	GM2A
LRFN4	SPARC
RBM14	ATOX1
DPP3	G3BP1
SLC29A2	GRIA1
RAB1B	FAM114A2
KLC2	MFAP3
SF3B2	GALNT10
GAL3ST3	SAP30L
DRAP1	CNOT8
MUS81	GEMIN5
CFL1	MRPL22
KAT5	SH3BP5L
MALAT1	RNF187
TIGD3	HIST3H2A
CAPN1	TRIM11
MRPL49	IBA57
ZNHIT2	GUK1
VPS51	MRPL55
SAC3D1	ARF1
ARL2	SNAP47
STIP1	JMJD4
RCOR2	MPRIP
WDR74	PLD6
TAF6L	FLCN
INTS5	NT5M
GANAB	COPS3
B3GAT3	MED9
MTA2	RASD1
TUT1	PEMT
EEF1G	RAI1
FADS2	SREBF1
FADS1	TOM1L2
SYT7	DRC3
SDHAF2	ATPAF2
CPSF7	GID4
VWCE	DRG2
TMEM132A	ALKBH5
TMEM109	LLGL1
MRPL16	FLII
FAM111A	MIEF2
CEP78	TOP3A
VPS13A	SMCR8
PRUNE2	SHMT1
PCSK5	DHRS7B
TRPM6	TMEM11
ABHD17B	NATD1
PTAR1	MAP2K3
TJP2	USP22
PUM3	ALDH3A2
GLIS3	MAPK7
CDC37L1	B9D1
AK3	EPN2
PLGRKT	ULK2
CD274	AKAP10
RIC1	SPECC1
ERMP1	ADORA2B
GLDC	ZSWIM7
CSTF2T	TTC19
CH25H	NCOR1
LIPA	PIGL
SLC16A12	CENPV
PANK1	UBB
KIF20B	SNORD49B
HECTD2	SNORD49A
BTAF1	SNORD65
MYOF	LRRC75A
CEP55	TRIM16
FRA10AC1	TVP23B
LGI1	PMP22
TBC1D12	HS3ST3B1
HELLS	COX10
CCNJ	HS3ST3A1
TLL2	ELAC2
TM9SF3	ARHGAP44
ARHGAP19	MYOCD
DNMBP	MAP2K4
ERLIN1	DNAH9
HIF1AN	TMEM220
KAZALD1	ADPRM
MGEA5	SCO1
HPS6	USP43
PPRC1	CFAP52
NFKB2	STX8
CUEDC2	NTN1
MIR146B	MYH10
ARL3	NDEL1
SFXN2	RPL26
CNNM2	SLC25A35
INA	RANGRF
NT5C2	PFAS
TAF5	CTC1
SFR1	AURKB
GSTO2	BORCS6
SMC3	TMEM107
PDCD4	VAMP2
ADRA2A	PER1
CASP7	HES7
DCLRE1A	ALOXE3
NHLRC2	CNTROB
FAM160B1	TRAPPC1
GFRA1	KCNAB3
RAB11FIP2	CHD3
EIF3A	NAA38
NMT2	CYB5D1
ACBD7	KDM6B
SUV39H2	DNAH2
PHYH	EFNB3
OPTN	WRAP53
CCDC3	ATP1B2
CDC123	SHBG
NUDT5	SAT2
UPF2	FXR2
PROSER2	MPDU1
PRKCQ	SENP3
FBXO18	TNFSF13
ANKRD16	TNFSF12
VIM	POLR2A
HACD1	ZBTB4
ARL5B	CHRNB1
MLLT10	FGF11
DNAJC1	TMEM102
SPAG6	SPEM1
ARHGAP21	NLGN2
MYO3A	TMEM256
ABI1	PLSCR3
MASTL	TMEM95
YME1L1	KCTD11
NXPH2	NEURL4
DPH7	GPS2
INPP5E	EIF5A
NOTCH1	YBX2
FAM69B	SLC2A4
REXO4	CTDNEP1
ADAMTS13	ELP5
VAV2	GABARAP
MRPS2	PHF23
SETX	DVL2
TRUB2	ACADVL
COQ4	DLG4
CERCAM	ASGR1
ODF2	SLC16A13
WDR34	BCL6B
ZER1	MIR497
TBC1D13	PELP1
LRRC8A	ARRB2
IER5L	MED11
ASB6	ZMYND15
FNBP1	CXCL16
GPR107	VMO1
ABL1	GLTPD2
TOR2A	PSMB6
ANGPTL2	PLD2
ZBTB43	MINK1
PBX3	RNF167
RABEPK	SLC25A11
FBXW2	PFN1
ZBTB26	ENO3
GPR21	SPAG7
OLFML2A	CAMTA2
WDR38	INCA1
SCAI	KIF1C
PPP6C	RABEP1
LRP1B	NUP88
ZEB2	RPAIN
RND3	C1QBP
RIF1	DHX33
STAM2	MIS12
FMNL2	DERL2
RPRM	WSCD1
PKP4	AIPL1
TANC1	PITPNM3
WDSUB1	TXNDC17
39142	MED31
RBMS1	SLC13A5
FIGN	TEKT1
COBLL1	MYBBP1A
TTC21B	UBE2G1
SCN7A	ANKFY1
LRP2	CYB5D2
FASTKD1	ZZEF1
METTL8	CAMKK1
DCAF17	NCBP3
HAT1	P2RX5
METAP1D	TAX1BP3
OLA1	EMC6
ATP5G3	CTNS
ITGA4	SHPK
PDE1A	SPATA22
NCKAP1	CLUH
ITGAV	PAFAH1B1
CALCRL	METTL16
TFPI	MNT
CLP1	SGSM2
SERPING1	TSR1
UBE2L6	SRR
TNKS1BP1	SMG6
PTPRJ	HIC1
NR1H3	MIR212
ACP2	MIR132
ARFGAP2	OVCA2
ARHGAP1	RPA1
ATG13	SMYD4
HARBI1	PITPNA
MDK	INPP5K
DGKZ	MYO1C
ALKBH3	VPS53
HSD17B12	FAM57A
MIR670	GEMIN4
TTC17	GLOD4
RAG2	NXN
TRAF6	BHLHA9
LDLRAD3	GOSR1
FJX1	CPD
PDHX	BLMH
APIP	SLC6A4
CAT	SSH2
HIPK3	CORO6
CSTF3	ANKRD13B
DEPDC7	GIT1
ELP4	ABHD15
IMMP1L	TAOK1
METTL15	NUFIP2
KIF18A	MYO18A
SLC12A6	PIPOX
EMC4	SEZ6
KATNBL1	PHF12
AQR	DHRS13
DPH6	FLOT2
SPRED1	ERAL1
FAM98B	FAM222B
THBS1	TRAF4
EIF2AK4	NEK8
BUB1B	TLCD1
INO80	RPL23A
NDUFAF1	SNORD42A
MAPKBP1	SNORD4A
EHD4	SNORD42B
SNAP23	RAB34
CCNDBP1	PROCA1
FRMD5	SDF2
CASC4	SPAG5
CTDSPL2	PIGS
SPG11	UNC119
SHF	SLC46A1
EID1	SARM1
SHC4	VTN
SECISBP2L	TMEM199
FAM227B	POLDIP2
DTWD1	TNFAIP1
SPPL2A	IFT20
STARD7	TMEM97
MERTK	NLK
ZC3H8	LYRM9
ZC3H6	NOS2
SNRPB	WSB1
NOP56	NF1
SNORD110	MIR193A
IDH3B	UTP6
VPS16	SUZ12
PCED1A	CRLF3
LZTS3	ATAD5
AP5S1	TEFM
MAVS	ADAP2
PANK2	RHOT1
PRNP	RHBDL3
PRND	PSMD11
RASSF2	CDK5R1
CHGB	MYO1D
CRLS1	TMEM98
TMX4	CCT6B
PLCB4	LIG3
JAG1	RFFL
ESF1	RAD51D
NDUFAF5	FNDC8
FLRT3	NLE1
RRBP1	SLFN5
RBBP9	PEX12
DTD1	AP2B1
NAA20	RASL10B
XRN2	USP32
GZF1	APPBP2
CST3	PPM1D
GINS1	BCAS3
NANP	TBX2
NSFL1C	TBX4
TBC1D20	BRIP1
ZCCHC3	INTS2
BCL2L1	MED13
TM9SF4	RNFT1
DNMT3B	RPS6KB1
GSS	TUBD1
RBM12	VMP1
PHF20	PTRH2
TGIF2	CLTC
RPN2	DHX40
MROH8	YPEL2
VSTM2L	GDPD1
SNHG17	SMG8
SNHG11	PRR11
ACTR5	SKA2
PPP1R16B	TRIM37
MAFB	PPM1E
SERINC3	RAD51C
PKIG	TEX14
TOMM34	MTMR4
WFDC2	MKS1
WFDC8	MSI2
SPATA25	AKAP1
CTSA	SCPEP1
NEURL2	COIL
PLTP	TRIM25
PCIF1	DGKE
NCOA5	NOG
OCSTAMP	PCTP
ZMYND8	HLF
SULF2	STXBP4
UBE2V1	COX11
ADNP	TOM1L1
SALL4	UTP18
ZFP64	MBTD1
RTFDC1	NME2
PMEPA1	NME1
STX16	SPAG9
CTSZ	TOB1
ADRM1	LUC7L3
DIDO1	ANKRD40
GID8	CACNA1G
ZBTB46	SPATA20
ABHD16B	RSAD1
ZFHX4	ACSF2
PEX2	LRRC59
IL7	EME1
MRPS28	MRPL27
TPD52	XYLT2
LRRCC1	TMEM92
YTHDF3	COL1A1
MIR124-2HG	SGCA
CYP7B1	PPP1R9B
ARMC1	SAMD14
PDE7A	PDK2
CRH	ITGA3
HLTF	DLX3
TBL1XR1	DLX4
NLGN1	TAC4
NCEH1	KAT7
GHSR	FAM117A
FNDC3B	SLC35B1
PLD1	SPOP
TNIK	NXPH3
RPL22L1	NGFR
ACTRT3	PHB
MYNN	PHOSPHO1
PHC3	IGF2BP1
ZMAT3	GIP
ACTL6A	SNF8
USP13	UBE2Z
TTC14	ATP5G1
ATP11B	CALCOCO2
DCUN1D1	SNX11
EXOSC9	CBX1
CCNA2	NFE2L1
BBS12	COPZ2
SPATA5	MIR152
NUDT6	CDK5RAP3
SPRY1	PNPO
ANKRD50	SP2
FAT4	SCRN2
PGRMC2	LRRC46
JADE1	MRPL10
PCDH10	OSBPL7
PCDH18	TBX21
SLC7A11	TBKBP1
NOCT	KPNB1
NDUFC1	RPL23
NAA15	SNORA21
MAML3	LASP1
FOXO1	PLXDC1
FREM2	ARL5C
TRPC4	CACNB1
SMAD9	RPL19
CCDC169	STAC2
PFN2	FBXL20
TSC22D2	MED1
EIF2A	CDK12
SERP1	PPP1R1B
MED12L	STARD3
RAP2B	PNMT
SLC33A1	PGAP3
SSR3	ERBB2
TIPARP	MIEN1
CCNL1	IKZF3
PTX3	ZPBP2
SHOX2	ORMDL3
RSRC1	PSMD3
RARRES1	CSF3
MFSD1	MED24
IL12A	THRA
GOLIM4	NR1D1
PPID	MSL1
ETFDH	CASC3
FAM198B	WIPF2
SFRP2	CDC6
MND1	RARA
TRIM2	GJD3
ARFIP1	TOP2A
DCLK2	IGFBP4
KIRREL	CCR7
PRCC	SMARCE1
HDGF	KRT10
RRNAD1	EIF1
ISG20L2	HAP1
CRABP2	JUP
NES	P3H4
MEF2D	FKBP10
LMNA	NT5C3B
MEX3A	KLHL10
UBQLN4	KLHL11
LAMTOR2	ACLY
FDPS	TTC25
THBS3	CNP
MUC1	DNAJC7
ADAM15	NKIRAS2
ZBTB7B	DHX58
SHC1	KAT2A
CKS1B	HSPB9
PYGO2	RAB5C
PBXIP1	KCNH4
PMVK	HCRT
CHRNB2	GHDC
UBAP2L	STAT5B
CRTC2	STAT5A
CHTOP	STAT3
S100A13	ATP6V0A1
OAZ3	NAGLU
MRPL9	HSD17B1
POGZ	COASY
PSMB4	MLX
PI4KB	PSMC3IP
VPS72	TUBG1
CDC42SE1	TUBG2
MLLT11	PLEKHH3
ARNT	CNTNAP1
MCL1	CCR10
RPRD2	EZH1
ANP32E	VPS25
VPS45	RAMP2
OTUD7B	CNTD1
HIST2H2AB	COA3
HIST2H2BE	BECN1
HIST2H2AC	PSME3
RBM8A	AARSD1
PIAS3	RUNDC1
POLR3C	PTGES3L
RNF115	RPL27
PRKAB2	RND2
VANGL1	VAT1
NRAS	BRCA1
OLFML3	NBR1
HIPK1	ARL4D
DCLRE1B	DHX8
AP4B1	ETV4
RSBN1	SOST
MAGI3	DUSP3
LRIG2	MPP3
SLC16A1	CD300LG
DDX20	MPP2
FAM212B	PYY
LRIF1	NAGS
RBM15	TMEM101
AMPD2	LSM12
GNAT2	G6PC3
CYB561D1	HDAC5
ATXN7L2	ASB16
SCARNA2	TMUB2
TMEM167B	ATXN7L3
TAF13	UBTF
STXBP3	RUNDC3A
FAM102B	SLC25A39
VAV3	GRN
OLFM3	FAM171A2
S1PR1	ITGA2B
SLC30A7	GPATCH8
EXTL2	FZD2
RTCA	CCDC43
SLC35A3	ADAM11
AGL	GJC1
FRRS1	EFTUD2
PLPPR5	CCDC103
SNX7	GFAP
PTBP2	KIF18B
RWDD3	C1QL1
ALG14	DCAKD
CNN3	NMT1
ABCD3	PLCD3
BCAR3	ACBD4
PDE5A	HEXIM1
SEC24D	HEXIM2
NDST3	FMNL1
TRAM1L1	MAP3K14
ARSJ	RPRML
CAMK2D	GOSR2
MIR302B	CDC27
ELOVL6	ITGB3
GAR1	MRC2
CASP6	CYB561
LEF1	ACE
HADH	DCAF7
SGMS2	TACO1
PAPSS1	MAP3K3
INTS12	LIMD2
GSTCD	CCDC47
PPA2	DDX42
CXXC4	FTSJ3
MANBA	PSMC5
SLC39A8	SMARCD2
H2AFZ	PRR29
DNAJB14	ERN1
MTTP	SNORD104
TRMT10A	TEX2
METAP1	POLG2
GTF2B	MIR3064
PKN2	DDX5
SH3GLB1	CEP95
CYR61	SMURF2
DDAH1	KPNA2
BCL10	BPTF
SYDE2	NOL11
SSX2IP	PITPNC1
GNG5	PSMD12
RPF1	HELZ
ADGRL2	CACNG4
DNAJB4	PRKCA
FUBP1	CEP112
NEXN	GNA13
USP33	AMZ2
PIGK	ARSG
ST6GALNAC5	SLC16A6
ST6GALNAC3	WIPI1
CRYZ	PRKAR1A
TYW3	FAM20A
CTH	ABCA5
SRSF11	MAP2K6
LRRC40	KCNJ2
TMEM68	SOX9
TGS1	SSTR2
SDCBP	COG1
TOX	SLC39A11
CHD7	FAM104A
CLVS1	CPSF4L
ASPH	CDC42EP4
DPY19L4	SDK2
RAD54B	RPL38
PDP1	TTYH2
TMEM55A	BTBD17
DECR1	GPR142
NBN	RAB37
OSGIN2	SLC9A3R1
MMP16	TMEM104
RMDN1	NAT9
GGH	GRIN2C
PNISR	FDXR
MMS22L	OTOP2
NDUFAF4	USH1G
UFL1	HID1
FUT9	CDR2L
BACH2	KCTD2
ANKRD6	ATP5H
UBE2J1	ARMC7
PM20D2	NT5C
SRSF12	SUMO2
PNRC1	NUP85
RNGTT	GGA3
CNR1	MRPS7
ORC3	MIF4GD
RARS2	SLC25A19
SMIM8	GRB2
LINGO2	TMEM94
ACO1	CASKIN2
DDX58	TSEN54
TMEM215	LLGL2
BAG1	SMIM5
CHMP5	RECQL5
DCAF12	SAP30BP
KIF24	GALK1
NUDT2	H3F3B
RPP25L	UNK
VCP	WBP2
PIGO	TRIM47
STOML2	TRIM65
FAM214B	MRPL38
CD72	FBF1
TLN1	ACOX1
CREB3	EVPL
[truncated: 8,740 more rows]

## Sheet: ChIP-peak-presence on IGV track
	CHD7	CHD8	TWIST1	Total peak positive
Lamb1	1	1	1	3
Sox2	1	1	1	3
Etv1	1	1	1	3
Asah1	1	1	1	3
Wasf2	1	1	1	3
Jag1	1	1	1	3
Itga9	1	1	1	3
Ctgf	1	1	1	3
Vcan	1	1	1	3
Prrx1	1	1	1	3
Pdgfc	1	1	1	3
Flrt3	1	1	1	3
Fgf10	1	1	1	3
Epha3	1	1	1	3
Ddit4	1	1	1	3
Adamts1	1	1	1	3
Rapgef3		1	1	2
Neurod1	1	1	1	3
Efnb1		1	1	2
Spock1	1	1		2
Rdh10		1	1	2
Id2		1	1	2
Fermt2		1	1	2
Jup	1	1	1	3
Sema3c	1	1	1	3
Ifrd1	1	1		2
Bmp6		1	1	2
Tyro3	1	1	1	3
Tcf12	1	1	1	3
Jam2	1	1	1	3
Dll3	1	1	1	3
Tsc1		1	1	2
Sema4g		1	1	2
Pitx3		1	1	2
Myd88		1	1	2
Foxd1		1	1	2
Tky2	1	1		2
Sdcbp	1	1		2
Obsl1	1	1		2
Lin7a	1	1		2
Adgrv1	1	1		2
Gab2		1		1
Spp		1	1	2
Insm1		1	1	2
Foxg1		1	1	2
Cd82		1	1	2
Adora1		1		1
Rab43	1	1	1	3
Luzp1	1	1	1	3
Arf4	1	1	1	3
Six4	1	1	1	3
Pcolce	1	1	1	3
Cacnb3	1	1	1	3
Pfn2	1	1	1	3
Khsrp	1	1	1	3
Nefm	1	1	1	3
Plk3	1	1	1	3
Pias3	1	1	1	3
Cltc	1	1	1	3
Fez1	1	1	1	3
Dag1	1	1	1	3
Gli3	1	1	1	3
Cdon	1	1	1	3
Bmp4	1	1	1	3
My010	1	1	1	3
Tgfbr2	1	1	1	3
Kcnd2	1	1	0.5	2.5
Cnr1	1	1	0.5	2.5
Hes3	1	1	0.5	2.5
App	1	1	0.5	2.5
Myh10	1	1	0.5	2.5
Adora2b	1	1	0.5	2.5
Dppa4	1	1		2
Enpp4	1	1		2
Akap2	1	1		2
Flnb		1		1
Kctd12		1	1	2
Bhlhe40		1	1	2
Camk2n1		1	1	2
Stc2		1	1	2
Uba2	1	1		2
Cpne5	1		1	2
Slc8a3		1	1	2
Syngr1	1	1		2
Prom1	1	1		2
Zic1	1	1	1	3
Zic4	1	1	1	3
Ap2a		1	1	2
Evl		1	1	2
Xbp1	1	1		2
Vps26a	1	1		2
Nedd4	1	1		2
Bmp2		1	1	2
Alx4		1	1	2
Mthfd1	1	1		2
Bicc1		1		1
Bnip3l		1		1
Ptpn13		1		1
Pou4f1		1	1	2
